# Supplementary material
Source: MDPI journal article supplement (https://www.mdpi.com/2813-0391/2/1/6)
Supplement: s1 [file s1]

Archive with 10 entries (10 files):
- S2_Detailed WMS-DSC matrix descriptio_R2_clean.pdf
- WMS-DSC_Tool_2023_Bangkok.xlsx
- WMS-DSC_Tool_2023_Brunei.xlsx
- WMS-DSC_Tool_2023_Hanoi.xlsx
- WMS-DSC_Tool_2023_Jakarta.xlsx
- WMS-DSC_Tool_2023_KualaLumpur.xlsx
- WMS-DSC_Tool_2023_Manila.xlsx
- WMS-DSC_Tool_2023_Phnom Penh.xlsx
- WMS-DSC_Tool_2023_Singapore.xlsx
- WMS-DSC_Tool_2023_Vientiane.xlsx
