# Supplementary material
Source: MDPI journal article supplement (https://www.mdpi.com/2813-0391/2/1/6)
Supplement: s1 [file s1 › WMS-DSC_Tool_2023_Bangkok.xlsx]

## Sheet: Results Overview
Overview of the results for the assessment of City, Country regarding								Overview of the results for the assessment of City, Country regarding
Governance, Sector and Market								Collection and Transport, Waste Disposal, Energy Recovery, Waste Recycling, Prevention and Reuse
		Stage 1	Stage 2	Stage 3	Stage 4	Stage 5				Stage 1	Stage 2	Stage 3	Stage 4	Stage 5
Governance	G.1 Duties and targets							Collection and transport	CT.1 Waste collection
	G.2 Laws, Regulations and Agreements								CT.2 Service provider
	G.3 Nomenclature								CT.3 Collection rates
	G.4 National level WM								CT.4 Separate collection
	G.5 Regional level WM								CT.5 Collection of recyclables
	G.6 Municipal level WM								CT.6 Waste transport
	G.7 Stakeholder cooperation								CT.7 Transfer stations
	G.8 Control mechanisms								CT.8 Collection of hazardous wastes
	G.9 Authorization and public participation							Waste disposal	WD.1 Waste disposal
	G.10 Quality standards and threshold values								WD.2 Operational measures
	G.11 Data collection, reporting and evaluation								WD.3 Leachate water management
	G.12 Education								WD.4 Landfill gas management
	G.13 Research								WD.5 Other means of disposal
	G.14 Awareness building							Energy recovery	ER.1 Thermal disposal and energy recovery
	G.15 Occupational health and safety								ER.2 Incineration plants
	G.16 Environmental protection								ER.3 Energy and raw material recovery
Sector and Market	SM.1 Sector development							Waste recycling	WR.1 Waste recycling
	SM.2 Jobs								WR.2 Composting
	SM.3 Informal sector								WR.3 Fermentation
	SM.4 WM system structure and organization								WR.4 Sorting and recycling plants
	SM.5 Financial funding								WR.5 Refuse derived fuel
	SM.6 Enterprises								WR.6 Recycling of construction and demolition waste
	SM.7 Recycling market								WR.7 Recycling rates
									WR.8 Diversion rate and Circular material use rate
								Prevention and reuse	PR.1 Prevention
									PR.2 Circular business and usage models
									PR.3 Product design
									PR.4 Process optimization and operational disposal strategies
									PR.5 Waste generation
									PR.6 Zero-waste index
								m	Subcomponent is met
								pm	Subcomponent is partly met
									Subcomponent is not met or data is not available

## Sheet: Collection and Transport
	Stage 1		Stage 2		Stage 3		Stage 4		Stage 5		Rationale / Source
Collection and transport (CT.1 - CT.8)
CT.1	CT.1.1.1 Lack of systematic collection; limited collection	nm	CT.1.2.1 Collection is systematic, but inefficient	nm	CT.1.3.1 Efficient collection through optimizing measures and concepts	m	CT.1.4.1 Underground systems in public spaces	nm	CT.1.5.1 Waste bins have no negative effect on landscape	nm	CT.1.3.1 + CT.1.3.2 + CT.1.3.3 -->m; CT.1.4.3 --> pm: The BMA Department of Environment has primary responsibility for the city’s waste management and works closely with its 50 district offices. There are about 1,894 waste collection trucks, ranging in size for waste collection services. Waste is collected directly from accessible households, institutions and businesses by municipal garbage colle…
	CT.1.1.2 Lack of uniform collection bins	nm	CT.1.2.2 Use of uniform aboveground systems	pm	CT.1.3.2 Use of new bin systems (e.g. waste locks)	m	CT.1.4.2 Waste bins with fill level sensors	nm	CT.1.5.2 Avoid of container overfilling (smart bins)	nm
			CT.1.2.3 Collection points are within 200m distance	pm	CT.1.3.3 Service provision of cleaning up bins	m	CT.1.4.3 Introduction of digitalization measures	pm	CT.1.5.3 Smart waste container separation	nm
	CT.1.1.3 Missing of basic principles of urban hygiene, major littering exists	nm	CT.1.2.4 Urban hygiene principles are partially met, but littering in public spaces remains a problem	pm					CT.1.5.4 Full maintainance of urban hygiene principles and no littering in public spaces	nm
CT.2	CT.2.1.1 Collection mostly by waste pickers	nm	CT.2.2.1 Collection mostly by formal sector	nm	CT.2.3.1 Collection mostly by formal or organized informal sector	m			CT.2.5.1 Waste collection exclusively by formal sector	nm	CT.2.3.1 --> m: Actors involve in Bangkok's recycling system: informal, semi-formal and formal sector: municipal garbage collectors sometimes hire informal workers to help them separate waste, which is then directly sold to junkshops for supplementary income. Access to waste transfer stations can be contentious with some facilities choosing to source their own informal workers to sort materials. …
CT.3	CT.3.1.1 Collection rate (CR): urban ≤ 50% OR no data	nm	CT.3.2.1 CR: urban > 50 and ≤ 70%	nm	CT.3.3.1 CR: urban > 70 and ≤ 80%	nm	CT.3.4.1 CR: urban > 80 and ≤ 95%	nm	CT.3.5.1 CR: urban > 95% and ≤ 100%	m	CT.3.5.1 --> m: MSW collection coverage upto 99% in Bangkok [3]. However, there is no data available for the rural areas.
	rural ≤ 30% OR no data	m	rural > 30 and ≤ 50%	nm	rural > 50 and ≤ 80%	nm	rural > 80 and ≤ 95%	nm	rural > 95% and ≤ 100%	nm
CT.4	CT.4.1.1 Collective collection of residual waste	nm	CT.4.2.1 First forms of separation at source collection (2 fractions)	nm	CT.4.3.1 Mandatory waste collection for households and businesses (>3 fractions)	pm	CT.4.4.1 Reduction of illegal collection (e.g. electronics)	nm	CT.4.5.1 All recyclables are collected separately	nm	CT.4.2.3 + CT.4.3.2 + CT.4.3.4 --> m; CT.4.2.2 + CT.4.3.1 --> pm: In 2020, the Bangkok Metropolitan Authority (BMA) launched a 3R (reduce, reuse, recycle) programme in 50 districts to promote waste reduction and separation at source. However, critics argue that similar campaigns have been unsuccessful in the past due to low levels of household awareness [1].
	CT.4.1.2 Recyclables solely collected by waste pickers	nm	CT.4.2.2 Recyclables collected by (in)formal sector	pm	CT.4.3.2 Set up of recycling centers	m
					CT.4.3.3 Rate of incorrect sorting > 30%	na	CT.4.4.2 Rate of incorrect sorting > 10 to ≤ 30%	na	CT.4.5.2 Rate of incorrect sorting ≤ 10%	na
			CT.4.2.3 Separate collection of hospital waste	m	CT.4.3.4 Separate collection of: electrical, construction, demolition, agricultural and forestry waste	m
CT.5	CT.5.1.1 CR are missing, only estimations are available or data is not publicly available	m	CT.5.2.1 Recyclables CR:		CT.5.3.1 Recyclables CR:		CT.5.4.1 Recyclables CR:		CT.5.5.1 Recyclables CR:		CT.5.1.1 --> CR for specific waste stream is missing
			Metals: ≤ 50%	na	Metals: > 50 and ≤ 70%		Metals: > 70 and ≤ 90%		Metals: > 90%
			Paper: ≤ 30%	na	Paper: > 30 and ≤ 70%		Paper: > 70 and ≤ 90%		Paper: > 90%
			Glass: ≤ 30%	na	Glass: > 30 and ≤ 70%		Glass: > 70 and ≤ 90%		Glass: > 90%
			Organics: ≤ 30%	na	Organics: > 30 and ≤ 70%		Organics: > 70 and ≤ 90%		Organics: > 90%
			Plastics : ≤ 10%	na	Plastics: > 10 and ≤ 50%		Plastics: > 50 and ≤ 90%		Plastics: >90%
			Textiles: ≤ 10%	na	Textiles: > 10 and ≤ 50%		Textiles: > 50 and ≤ 90%		Textiles: >90%
CT.6	CT.6.1.1 Formal: Only use of simple vehicles	nm	CT.6.2.1 Formal: Mostly use of large fleets and automation	pm	CT.6.3.1 Formal: Waste firms improve vehicle fleets (incl. compactors, lifters).	m	CT.6.4.1 Use vehicles depending on waste type	pm	CT.6.5.1 Higly engineered and fully automated vehicles		CT.6.2.1 + CT6.2.2 + CT.6.3.2 --> pm; CT.6.3.1 -->m: There are about 1.894 waste collection truck operating in Bangkok which the model is varied e.g. 2T/5T truck, lifiting container truck, compressed truck [4]; while informal sector e.g Selengs - who travel around on small motorcycle or tricycles collecting recycable wastes, where some informal sector also have small size truck. [1;4]
	CT.6.1.2 Informal: Only use of pack animals, handcarts, etc.	nm	CT.6.2.2 Informal: Mostly use of small or modified vehicles	pm	CT.6.3.2 Informal: Mostly use of modernized small trucks	pm	See WM 3.4.1
CT.7	CT.7.1.1 Direct transport of waste to landfills or dumps	nm	CT.7.2.1 Introduction of transfer stations (TS)	nm	CT.7.3.1 TS increase collection efficiency	m			CT.7.5.1 All existing TS are state of the art	nm	CT.7.3.1 + CT.7.3.2 --> m: Waste collected is transfered to three transfer stations namely Sai Mai; On Nut and Nongkhaem transfer stations. Recycable waste is also sorted , where organic also goes directly to waste composting processor at On Nut transfer station. [1]
	CT.7.1.2 Roads used as transfer areas for waste	nm	CT.7.2.2 Simple TS are unrestricted accessible to public	nm	CT.7.3.2 Advanced TS with restricted access to public.	m
CT.8	CT.8.1.1 Lack of separate collection of hazardous waste (HW) from households	nm	CT.8.2.1 Small HW quantities from households are collected separatly	pm	CT.8.3.1 Disposal of small quantities of HW is free of charge	pm	CT.8.4.1 Full collection of HW flows	nm	CT.8.5.1 HW quantities are reduced to a minimum	nm	CT.8.2.1 + CT.8.3.1 + CT.8.4.1 --> pm; CT.8.3.2 --> m: There is a speate collection of Hazardous waste from industrial. Household hazardous waste such as mobiles phone, charger can be dropped at selected location free of charge though AIS - E-waste Green network program. [5] According to the Pollution Control Department’s Thailand State of Pollution 2016 report, the Thai industrial sector produce…
	CT.8.1.2 Lack of separate collection of industrial HW	nm			CT.8.3.2 Industrial HW is collected almost separately	pm
m	fully met
pm	partially met
nm	not met
na	not available

## Sheet: Waste Disposal
	Stage 1		Stage 2		Stage 3		Stage 4		Stage 5		Rationale / Source
Waste disposal (WD.1 - WD.5)
WD.1	WD.1.1.1 Lack of targeted and centralized waste disposal	nm	WD.1.2.1 Targeted and centralized waste disposal in minimum controlled landfills	m	WD.1.3.1 Introduction of landfill classes	pm	WD.1.4.1 Mineral waste is predominantly landfilled	na	WD.1.5.1 Waste landfilling gets less important	nm	WD.1.2.1 + WD.1.2.2 -->m; WD.1.3.1 + WD.1.3.3 + WD.1.3.4 + WD.1.4.2 +WD.1.4.4 + WD.1.4.6 --> pm: For Bangkok, after recycable materials are sorted at transfer station, the remaining solid waste is disposed at landfill sites located outside of the Bangkok metropolitan area. Waste from Sai Mai and Nong Khaem transfer stations is taken to a landfill site in Kamphaeng Saen District, Nakhon Pathom Pro…
	WD.1.1.2 Disposal in open dumps, uncontrolled landfills, roads etc.	nm	WD.1.2.2 Open burning and dumping is illegal, but still practiced	m	WD.1.3.2 Non-hazardous and hazardous waste are no longer disposed together	nm	WD.1.4.2 Recyclables are rarely landfilled	pm	WD.1.5.2 Small quantities of waste are landfilled	nm
	WD.1.1.3 Open burning for eliminiation and energy recovery	nm			WD.1.3.3 Liquid waste is no longer disposed in landfills	nm	WD.1.4.3 After-use of landfills gets more relevant	nm	WD.1.5.3 Reuse of closed landfill areas for other purposes	nm
					WD.1.3.4 Conversion of (in)active landfills to sanitary standard.	pm	WD.1.4.4 Waste is disposed exclusively on sanitary landfills	pm	WD.1.5.4 Importance of rehabilitation of old landfills	nm
							WD.1.4.5 Safe disposal of disaster waste on approved sites	na	WD.1.5.5 Full avoidance of illegal dumping	nm
	WD.1.1.4 Open dump and controlled dump predominate	nm	WD.1.2.3 Controlled or engineered landfill predominate	m			WD.1.4.6 Sanitary landfill predominates	pm	WD.1.5.6 All (in)active landfills have sanitary landfill standard	nm
WD.2	WD.2.1.1 Lack of disposal controls (waste registration)	nm	WD.2.2.1 Registration of waste type, etc. before disposal	m	WD.2.3.1 Registration and compaction of waste are the norm	pm			WD.2.5.1 All existing and new landfills comply with the current state of art	nm	WD.3.2.1 + WD.3.2.2 + WD.3.2.3 --> m; WD.3.4.1 + WD.3.3.1 --> pm: Located about 40 minutes by car outside Nakhon Pathom, Thailand, the East and West Kamphaeng Saen landfill sites are among the largest landfills in the region, taking in approximately 5-7,000 tonnes of waste per day between them. The landfills are owned and managed by two private Thai companies that have contracted with the Bangkok…
	WD.2.1.2. Waste is burned on dumping sites	nm	WD.2.2.2 Waste burning on landfill sites is missing	pm	WD.2.3.2 Systematic pre-treatment of waste is mandatory	pm
	WD.2.1.3 Landfill access controls are lacking or inadequate	nm	WD.2.2.3 Compaction and daily cover of waste	m	WD.2.3.3 Systematic landfill management is carried out	pm
			WD.2.2.4 Site drawing showing landfill boundary and filling area in place	m	WD.2.3.4 Realization of measures for (post-)closure management	pm
	WD.2.1.4 Dumping sites are not staffed or only in short times for site checking	nm	WD.2.2.5 Site is staffed during operational hours	m
WD.3	WD.3.1.1 Leachate infiltrates soil or evaporates	nm	WD.3.2.1 Available leachate collection	m	WD.3.3.1 Leachate collection and treatment in all active landfills	pm	WD.3.4.1 Compliance of strict limits at water monitoring	pm	WD.3.5.1 Decrease of leachate and toxicity	nm
	WD.3.1.2 Lack of surface and groundwaster monitoring	nm	WD.3.2.2 Recirculation of leachate in the landfill body	m
			WD.3.2.3 Surface and groundwater is monitored	m
WD.4	WD.4.1.1 Landfill gas is released into the atmosphere	nm	WD.4.2.1 Implementation of passive collection or flaring of landfill gas	m	WD.4.3.1 Landfill gas collection for energy recovery and gas monitoring	m	WD.4.4.1 Compliance of strict limits for gas monitoring	pm	WD.4.5.1 Controlled flaring of landfill gas only in emergencies and when it is unprofitable (small gas quantities)	nm	WD.4.2.1 + WD.4.3.1 --> m; WD.4.4.1 --> pm: At Kamphaeng Saen Landfill, which accepts approximately 5,000 tonnes of waste per day from Bangkok, this project captures and utilises landfill gas (LFG) to generate renewable electricity and avoid the release of potent greenhouse gases (GHGs). [7;9]
WD.5	WD.5.1.1 Waste burning or dumping on high seas and coastal waters	nm			WD.5.3.1 Waste burning or dumping on high seas and coastal waters is prohibited, but still takes place	m			WD.5.5.1 Avoidance of waste burning or dumping on high seas and coastal waters	nm	WD.5.3.1 --> m: Approximately 51,000 tons of the uncollected and improperly disposed plastic waste in Thailand gets washed into the sea each year. Along Thailand’s 3219km coastline – rich in coastal and marine biodiversity – plastic pollution is impacting the beaches, coral zone and mangrove ecosystems and ranking the 6th biggest contributor of marin plastic litter. [11]
m	fully met
pm	partially met
nm	not met
na	not available

## Sheet: Energy Recovery
	Stage 1		Stage 2		Stage 3		Stage 4		Stage 5		Rationale / Source
Energy Recovery (ER.1 - ER.3)
ER.1	ER.1.1.1 Controlled energy recovery or thermal disposal is missing	nm	Availability of organizational criteria:		ER.1.3.1 ER is used to treat large waste quantities of the city inside or outside the country	nm	ER.1.4.1 ER is essential treatment alternative	pm	ER.1.5.1 Incinerated waste amount decreases due to higher recycling rates	na	Organizational and technical criteria + ER.1.2.3 + ER.1.3.2 --> pm; ER.1.3.3 --> m: The waste chracteristics and calorific value showed the suitablility for AD/thermal recovery of energy. In 2014, The government aims to generate energy from MSW upto 160 MW, which almost 50 projects in MSW have been submitted with the majority of small scale power project <10 MW. [8] In 2016, Bangkok opened its fi…
			I) controlled landfills	m	ER.1.3.2 Agreements regulate waste delivery, energy sales and pricing	pm
			II) qualified staff	m	ER.1.3.3 At least 150.000 tons/y of suitable waste are available for incineration	m	ER.1.4.2 Lower heating value has to be at least 11 MJ/kg	na
			III) systematic collection	m
			IV) Sorting at source is implemented	m
			V) Basic WM laws and rules are developed	m
			VI) Incineration plants are positioned in political plans	m
			VII) Political and social will is given	pm
			VIII) Total costs for the plant are secured	m
			IX) Public or private actors are experienced in managing incineration plants efficiently	pm
			X) Spare parts can be purchased locally or imported	na
			Availibility of technical criteria:
			I) stable supply of combustible waste	m
			II) lower heating value at least 7 MJ/kg	na
			III) Bottom and fly ash can be treated safely	pm
	ER.1.1.2 Co-incineration of waste is missing	nm	ER.1.2.3 Co-incineration of specific waste or RDFs in industrial firing plants	pm	ER.1.3.4 ER as alternative for landfilling; energy-intensive industries often make use of it	pm
ER.2	ER.2.1.1 Waste incinerators are neither operating or planned in the country	nm	ER.2.2.1 Incineration plants (incl. flue gas cleaning - FGC) are in planning or construction in the country or simple incineration plants without FGC are in operation with engineered process controls (incl. continous monitoring and recording of operating parameters)	m	ER.2.3.1 Operation of waste incinerators with FGC	na	ER.2.4.1 High-tech and state of the art processes ensure reliability and safe emission elimination	na	ER.2.5.1 Automatic and homogenous waste input	na
					I) Continuous monitoring of operating parameters and emissions	pm	ER.2.4.2 Flue gas controls compliant with applicable environmental standards	na
					II) Monitoring systems are routinely calibrated	m
					III) Maintenance plans or schedules are in place	m
					IV) Evidence that equipment is well maintained	m
					V) Fire extinguishers available on site	m
ER.3	ER.3.1.1 Raw material and ER through controlled waste incineration is missing	nm	ER.3.2.1 Possible recovery of energy through waste incineration	m	ER.3.3.1 Selling of recovered energy (electrical, thermal, combination)	na			ER.3.5.1 Increased replacing of primary energy resources	na	ER.3.2.1 + Recycling of incineration residues is missing --> m: There is a recovery of energy from incinerations. However, the detailed technical aspects are not really public available and the recycling of incineration residues are not widely discussed.
					ER.3.3.2 Incineration or RDF plants are located in areas with moderate heat demand and good transport and energy infrastructure exists	na
			ER.3.2.2 Recycling of incineration residues is missing	m	ER.3.3.3 Recovered metals from incineration process are sold; other by-products are treated safely, but recycled rarely	na	ER.3.4.1 Increased recycling and reuse of slags	na	ER.3.5.2 Almost complete reintroduction of by-products from incineration into the economic cycle	na
m	fully met
pm	partially met
nm	not met
na	not available

## Sheet: Waste Recycling
	Stage 1		Stage 2		Stage 3		Stage 4		Stage 5		Rationale / Source
Waste recycling (WR.1 - WR.8)
WR.1	WR.1.1.1 Material recycling is rarely done, but open-loop recycling and downcycling predominate	nm			WR.1.3.1 Extension of waste treatment by mechanical, biological, etc. treatment options	m	WR.1.4.1 (Semi-)closed-loop recycling and upcycling increase	pm	WR.1.5.1 (Semi-)closed-loop recycling dominates	nm	WR.1.3.1 + WR.1.3.2 --> pm; WR1.4.1 +WR.1.4.2 + WR.1.4.3 -->pm: There are approximately 23 mechnical biological treatment plant throughout the country [3]. Together with the transfer stations, recycable waste such as plastic, paper, glass, metal, can be dirvert from dispose of at landfill and go for material recycling [1] Out of the volume of 26.19 million tons/year of municipal solid waste gener…
							WR.1.4.2 Dialogues between manufactures and recyclers take place to identify and solve recycling problems	pm	WR.1.5.2 Implementation of circular bioeconomy	nm
	WR.1.1.2 Ensured input for recycling plants is lacking	nm			WR.1.3.2 Input for recycling plants is partly ensured	m	WR.1.4.3 Input for recycling plants is fully ensured	pm
WR.2	WR.2.1.1 Organic waste is landfilled or is composted at home or used as animal food	m	WR.2.2.1 Recycling of organics in simple or open composting plants or with mobile aggregates	pm	WR.2.3.1 Introduction of static, closed composting in tunnels / containers with sorting technologies	na	WR.2.4.1 Integration of (quasi-) dynamic processes in existing plants	na	WR.2.5.1 Microplastics is removed from compost	nm	WR.2.1.1 --> m; WR.2.21 + WR.2.2.2 + WR.2.3.2 -->pm: Organic waste in particular has the highest unrealized potential, making up 83% of total waste generated by weight and 90% of total waste thrown out as trash. Households face difficulties in composting due to lack of knowledge and appropriate storage facilities and lack of economic incentive [2]. Throughout the country, there is approximately 3…
			WR.2.2.2 Compost has low compost quality	pm	WR.2.3.2 Increased use of compost in agriculture & landscape management	pm	WR.2.4.2 High quality compost, which still contains microplastic	na	WR.2.5.2 Very high quality and purity level of compost	nm
							WR.2.4.3 Increased use of compost in the private sector	na
WR.3	WR.3.1.1 No planned or operation fermentation plants	nm	WR.3.2.1 Planning or construction of fermentation plants	pm	WR.3.3.1 Fermentation plants recycle organics	pm			WR.3.5.1 Biogas plants are an essential component of CE	nm	WR.3.2.1 + WR.3.3.1 + WR.3.3.2 + WR.3.3.3 --> pm: back in 2014, there were fermentation project aiming for energy recovery in different locations outside of Bangkok [8]. There are number of biogas plants and homescale biogas from animal manure and food waste fermentation for household consumption. However, no further details on the technical aspects can be found.
					WR.3.3.2 Separation of impurities for energetical use of biogas (e.g. in combined heat and power plants)	pm	WR.3.4.1 Introduction of CO2-separation stage at plants	na
							WR.3.4.2 Feeding of biomethan into the natural gas grid	na
					WR.3.3.3 Fermentation residues are used as fertilizers	pm	WR.3.4.3 Very high quality of digestates	na	WR.3.5.2 Mostly full removal of microplastics from digestates	nm
WR.4	WR.4.1.1 Manual sorting of recyclables	m	WR.4.2.1 Partially automated sorting of recyclables (incl. shredding and separation units)	m	WR.4.3.1 Increase of sorting efficiencies through mechanical separation, screening aggregates	m	WR.4.4.1 Generation of high-quality fractions through modern sorting facilities	pm	WR.4.5.1 Increasingly digitalized recycling technologies	nm	WR.4.1.1 + WR.4.2.1 + WR.4.3.1 --> m; WR.4.1.2 + WR.4.2.2 + WR.4.3.2 + WR.4.3.3 + WR.4.4.1 --> pm: After sorting by informal waste collectors, recyclable materials are sold to waste dealer shops – also referred to as junk shops or scrap shops, including both licensed and unlicensed dealers. These waste dealers often trade among themselves, with the largest dealers among them selling plastic in bu…
	WR.4.1.2 Inefficient recovery of valuable materials from electronic waste	pm	WR.4.2.2 Recovery of metals and RDFs in mechanical-biological plants	pm	WR.4.3.2 Generation of high quality mono-fractions	pm			WR.4.5.2 Increasing use of digitalization measures to rise recyclability of products	nm
					WR.4.3.3 Use of stabilate processes to separate metals and RDFs	pm	WR.4.4.2 Production of methanol or synthesis gas from raw material plastic recycling	na
									WR.4.5.3 Safe recycling of waste containing harmful substances	nm
WR.5	WR.5.1.1 Lack of RDFs recovery from waste	pm	WR.5.2.1 Start of RDF recovery from waste treatment plants	pm	WR.5.3.1 Increasing recovery of RDFs from waste	na			WR.5.5.1 RDF is decreasing due higher closed loop recycling	nm	WR.5.1.1 + WR.5.2.1 --> pm: Waste-to-Energy method is processed by putting solid waste in the processing procedure to generate energy in the form of electricity or an alternative energy source of refuse derived fuel (RDF). The volume of waste collected for this purpose was about 0.10 million tons, or 2%, of the total volume of the utilized waste. [15]
WR.6	WR.6.1.1 Only conventional demolition of buildings	pm	WR.6.2.1 Mostly conventional demolition of buildings	pm	WR.6.3.1 Semi-selective demolition occurs predominantly	na	WR.6.4.1 Predomination of selective demolition	na	WR.6.5.1 Only selective demolition occurs	nm	WR.6.1.1 + WR.6.1.2 + WR.6.1.3 + WR.6.2.1 + WR.6.2.2 + WR.6.2.3 + WR.6.3.3 --> pm: As for the amount of C&D waste in Thailand, especially in Bangkok area, since most of the building’s construction is done by demolishing or renovating the existing building area, thus the construction waste is generated at an average of 5.81 tons per 100 square meters of the building construction permit, equivalent…
	WR.6.1.2 Depollution is done rarely	pm	WR.6.2.2 More frequent de-pollution	pm			WR.6.4.2 Depollution is usual practice in demolition	na
	WR.6.1.3 C&D waste disposal on landfills/dumps predominates	pm	WR.6.2.3 Rare use of C&D material as filler or surface excavations	pm	WR.6.3.2 Increased use of C&D materials as filler or for landfill construction	na	WR.6.4.3 Increased high quality recycled construction material	na	WR.6.5.2 Almost complete recycling of C&D waste, little is landfilled	nm
					WR.6.3.3 Emerging of recycling routes for C&D materials (road construction)	pm	WR.6.4.4 Thermal treatment or landfilling of non-recyclable construction materials	na	WR.6.5.3 Prohibition of non-recyclable materials for construction	nm
							WR.6.4.5 Use of robotics for efficient sorting	na
WR.7	WR.7.1.1 Precise recycling rate numbers are missing	m	WR.7.2.1 Recycling rates:		WR.7.3.1 Recycling rates:		WR.7.4.1 Recycling rates:		WR.7.5.1 Recycling rates:		WR.7.1.1 --> m; WR.7.3.1 + WR.7.4.1 --> pm: The majority of the recycling rate for diffrent streams are missing. Only few that available as mentioned in UNEP report (>90% (Metal) 50% - 60% (Paper, Construction) <50% (Others) [18] According to World Bank, plastic was 17.6% . However, as not all waste stream rates are present; it is assigned to mixed stages.
			Metals: ≤ 40 %	nm	Metals: > 40 and ≤ 70 %	nm	Metals: > 70 and ≤ 90 %	m	Metals: > 90 %	nm
			Paper: ≤ 40 %	nm	Paper: > 40 and ≤ 70 %	m	Paper: > 70 and ≤ 90 %	nm	Paper: > 90 %	nm
			Glass: ≤ 40 %	na	Glass: > 40 and ≤ 70 %	na	Glass: > 70 and ≤ 90 %	na	Glass: > 90 %	na
			Composites: ≤ 20 %	na	Composites: > 20 and ≤ 60 %	na	Composites: > 60 and ≤ 90 %	na	Composites: > 90 %	na
			Plastics: ≤ 20 %	m	Plastics: > 20 and ≤ 60 %	nm	Plastics: > 60 and ≤ 90 %	nm	Plastics: > 90 %	nm
			WR.7.2.2 Recycling rates:		WR.7.3.2 Recycling rates:		WR.7.4.2 Recycling rates:		WR.7.5.2 Recycling rates:
			E-Waste: > 10 and ≤ 40 %	na	E-Waste: > 40 and ≤ 70 %	nm	E-Waste: > 70 and ≤ 90 %	nm	E-Waste: > 90 %	nm
			C&D waste: > 10 and ≤ 40 %	nm	C&D waste: > 40 and ≤ 70 %	m	C&D waste: > 70 and ≤ 90 %	nm	C&D waste: > 90 %	nm
WR.8	WR.8.1.1 CMUR: ≤ 1 % OR no data	m	WR.8.2.1 CMUR: > 1 % ≤ 10 %	na	WR.8.3.1 CMUR: > 10 % ≤ 30 %	na	WR.8.4.1 CMUR: > 30 % ≤ 70 %	na	WR.8.5.1 CMUR: > 70 %	na	N/A
	WR.8.1.2 DR: ≤ 0,1 OR no data	m	WR.8.2.2 DR: > 0,1 ≤ 0,2	na	WR.8.3.2 DR: > 0,2 ≤ 0,4	na	WR.8.4.2 DR: > 0,4 ≤ 0,7	na	WR.8.5.2 DR: > 0,7 ≤ 1,0	na
m	fully met
pm	partially met
nm	not met
na	not available

## Sheet: Prevention and Reuse
	Stage 1		Stage 2		Stage 3		Stage 4		Stage 5		Rationale / Source
Prevention and reuse (PR.1 - PR.6)
PR.1	PR.1.1.1 Prevention is motivated by poverty	nm	PR.1.2.1 Prevention is motivated by lack of resources	pm					PR.1.5.1 Decoupling of GDP and waste generation	nm	PR.1.2.1 + PR.1.3.3 -->m; PR1.3.1 + PR.1.3.2 + PR1.4.1 --> pm: Thailand’s Environmental Quality Management Plan (2017-2022) calls for unified efforts to support food waste reduction by the public and private sectors; The Policy and Plan to Promote and Preserve the National Environmental Quality (2017-2036) notes the issue of food waste management, and public information – through the development …
					PR.1.3.1 Higher political priority for food waste issues	pm	PR.1.4.1 Formulation of food waste avoidance targets and implementation of measures	pm	PR.1.5.2 Food waste is reduced to a minimum	nm
					PR.1.3.2 Few disposables are banned or permitted exceptionnally	pm	PR.1.4.2 All disposables are banned or permitted exceptionnally	nm	PR.1.5.3 CE reduces negative impacts of materials and products by avoiding resources or waste	nm
							PR.1.4.3 Prohibited destruction of unsold durable goods	nm	PR.1.5.4 Increase of bans for substances and products	nm
					PR.1.3.3 Emerging initiatives to educate the population regarding closing-loops	m			PR.1.5.5 CE provides long use of raw materials in the cycle	nm
							PR.1.4.4 Ensured lifetime-extension of buildings before construction	na	PR.1.5.6 Full deconstruction of buildings is ensured before their realization	nm
									PR.1.5.7 Consumption decisions based on waste prevention	nm
PR.2	PR.2.1.1 Lack of circular business and usage models	nm	PR.2.2.1 Spare parts of End-of-life (EoL) products are used for repair	pm	PR.2.3.1 Increased use of EoL spare parts	pm			PR.2.5.1 Permanent provision of spare parts through digitalization	nm	PR.2.2.1 + PR.2.2.2 + PR.2.3.1 + PR.2.3.2 + PR.2.3.3 + PR.2.3.4 + PR.2.3.5 + PR.2.4.2 --> pm ; PR.3.1.1 + PR.3.1.2 + PR.3.1.3 + PR.3.2.1 + PR.3.2.2 + PR.3.3.1 --> pm: PR.4.1.1 + PR.4.2.1 + PR.4.3.1 --> pm: In Thailand, social enterprises have a big part to play in advancing the circular economy. These organizations focus on making a positive impact while conducting their operations sustainably by…
					PR.2.3.2 Small use of professional repair by small part of the population	pm	PR.2.4.1 High use of professional repair by big part of the population	na
					PR.2.3.3 Minimum one online spare market exists	m	PR.2.4.2 Various online spare markets exist	pm	PR.2.5.2 Spare part markets are an integral part of CE	nm
					PR.2.3.4 Product service systems (sharing and leasing) are offered	pm			PR.2.5.3 Sharing and leasing are an integral part of CE	nm
			PR.2.2.2 Voluntary take-back systems for certain wastes (e.g. pharmaceuticals, batteries) exist	pm	PR.2.3.5 Introduction of take-back or deposit systems for certain wastes (e.g. beverage packaging)	pm	PR.2.4.3 Deposit obligation to all single-use beverage packaging and change of deposit contribution	nm	PR.2.5.4 Innovative take-back and collection systems enable reuse and high-quality recycling	nm
							PR.2.4.4 Introduction of deposits on material relevant products (e.g. tablets, smartphones)	nm
PR.3	PR.3.1.1 Companies neglect EoL issues of their products	pm	PR.3.2.1 Pioneer companies are considering EoL issues of their products	pm	PR.3.3.1 Through Eco-design several manufacturers are producing in a more environmental friendly way	pm	PR.3.4.1 Increased use of homogenous easy separable, harmfree and secondary materials; less use of disruptive substances	nm	PR.3.5.1 High use of secondary, recyclable or biobased materials for product manufacture	nm
	PR.3.1.2 Innovative composite materials are causing disposal problems due to the negligence of EoL in the product design phase	pm					PR.3.4.2 Recyclability, durability and upgradability is generally considered in product design phase	na	PR.3.5.2 EoL concepts for innovative products prior to market introduction are elaborated to minimize problems at the EoL phase	nm
	PR.3.1.3 Companies neglect recyclability, material saving and substitution of hazardous substances during product design phase	pm	PR.3.2.2 Some companies consider recyclability, material savings and substitution of hazardous substances in product design phase	pm					PR.3.5.3 Product recyclability is one basic condition for product marketing	nm
							PR.3.4.3 Increasing life cycle assessment of products	na	PR.3.5.4 Almost all companies consider all life cycle phases	nm
					PR.3.3.2 Pioneer companies set voluntarly a minimum use rates for secondary resources in their products	pm	PR.3.4.4 Legal minimum use rates for recyclates in plastic products: between ≥ 30 % and < 60 %	na	PR.3.5.5 Legal minimum use rates or recyclates in plastic products: ≥ 60 %	nm
PR.4	PR.4.1.1 Neglection of issues for proper waste disposal and waste avoidance in companies	pm	PR.4.2.1 Pioneer companies consider issues as improving their waste disposal and prevent waste	pm	PR.4.3.1 Evaluation of production processes	pm	PR.4.4.1 Inreased investigation of resource efficiency potentials	na	PR.4.5.1 Waste avoidance and closing loops practice in companies	nm
					PR.4.3.2 Substitution of some hazardous materials with non or less hazardous materials	na	PR.4.4.2 Several companies are substituting hazardous with non-hazardous substances	na	PR.4.5.2 Use of pollutants in CE, if controlled circulation considering thresholds is ensured	nm
PR.5	PR.5.1.1 WG: ≥ 2 kg/cap + d	nm	PR.5.2.1 WG: ≥ 1,5 < 2 kg/cap + d	nm	PR.5.3.1 WG: ≥ 1 < 1,5 kg/cap + d	m	PR.5.4.1 WG: ≥ 0,5 < 1 kg/cap + d	nm	PR.5.5.1 WG: < 0,5 kg/cap + d	nm	PR.5.3.1 --> 1.35 kg/day [3]
PR.6	PR.6.1.1 ZWI: ≤ 0,05	m	PR.6.2.1 ZWI: > 0,05 ≤ 0,15	na	PR.6.3.1 ZWI: > 0,15 ≤ 0,4	na	PR.6.4.1 ZWI: > 0,4 ≤ 0,9	na	PR.6.5.1 ZWI: ≥ 0,9	na	PR.6.1.1 --> categorized in very low Zero waste index <0.05
m	fully met
pm	partially met
nm	not met
na	not available

## Sheet: References
Ref. No	Description
1	ESCAP (2017). Closing the loop - Sai Mai District, Bangkok. Available online: https://repository.unescap.org/bitstream/handle/20.500.12870/231/ESCAP-2019-RP-Closing-the-loop-Saimai-Bangkok-case-study.pdf?sequence=1&isAllowed=y
2	SEI (2022). Household waste and circular economy in Bangkok. Available online: https://www.sei.org/wp-content/uploads/2022/12/household-waste-bangkok-sei2022.051.pdf
3	GIZ (2017). Circular Economy Briefing Series - Country profile Thailand. Available online: https://www.giz.de/en/downloads/giz2018_Thailand-Country-Profile_web.pdf
4	Bangkok Metropolitan Administration (2016). Solid Waste Management in Bangkok. Available online: https://www.jesc.or.jp/Portals/0/center/training/10thasia3r/8.10thasia3r_bangkok.pdf
5	E-waste Green Network (2023). Dropoff points. Available online: https://ewastethailand.com/
6	Thailand Development Research Institute (2018). Tackling Thailand's hazardous waste control crisis. Available online: https://tdri.or.th/en/2018/07/tackling-thailands-hazardous-waste-control-crisis/
7	Climate Impact Partner (2023). Khamphaeng Sean Landfill gas, Thailand. Available online: https://www.climateimpact.com/global-projects/kamphaeng-saen-landfill-gas-thailand/
8	Asian Institute of Technology (2014). An overview of MSW Waste to Energy and Climate co-benefit a case study Thailand. Available online: https://ir3s.ifi.u-tokyo.ac.jp/3e-nexus/pdf/022414/session02-01.pdf
9	World Bank (2016). Financing Landfill Gas Projects in Developing countries.
10	UN-Habitat (2022). A study tour to Thailand’s Saen Suk solid waste final disposal site. Available online: https://fukuoka.unhabitat.org/en/information/story/4737/
11	Sea Circular (2023). Profile - Thailand. Available online: https://www.sea-circular.org/country/thailand/
12	Mongabay (2022). As Waste to Energy incinerators spread in Southeast Asia, so do concerns. Available online: https://news.mongabay.com/2022/12/as-waste-to-energy-incinerators-spread-in-southeast-asia-so-do-concerns/
13	Bangkok Post (2012). Incineration plant a first for Bangkok. Available online: https://www.bangkokpost.com/business/327644/incineration-plant-a-first-for-bangkok
14	Bunditsakulchai, P.; Liu, C. Integrated Strategies for Household Food Waste Reduction in Bangkok. Sustainability 2021, 13, 7651. https://doi.org/10.3390/su13147651
15	UNCRD (2017). Country chapter State of 3Rs in Asia and the Pacific - The Kingdom of Thailand. Available online: https://www.uncrd.or.jp/content/documents/5695[Nov%202017]%20Thailand.pdf
16	Doan, D., Chinda, T., (2016). Modeling Construction and Demolition Waste Recycling Program in Bangkok: Benefit and Cost Analysis
17	TIIS (2023). Construction and building materials.
18	UNEP (2017). Waste Management in ASEAN countries. Available online: https://wedocs.unep.org/bitstream/handle/20.500.11822/21134/waste_mgt_asean_summary.pdf?sequence=1&amp%3BisAllowed=
19	UNEP (2021) Using green and digital technologies to reduce food waste at consumer level case study - Bangkok Thailand
20	Stratsea (2023). Thailand's waste crisis and Circular Economy. Available online: https://stratsea.com/thailands-waste-crisis-and-circular-economy/
21	Steam Platform (2023). Leadership & Partnership Platform for Smart Circular Economy Transformation. Available online: https://www.steamplatform.org/about
22	ThaiBev (2023). Waste and Packaging Management and Circular Economy. Available online: https://sustainability.thaibev.com/2020/en/waste_management.php
23	Zaman, A., Swapan, M. Performance evaluation and benchmarking of global waste management systems, Resources, Conservation and Recycling, Volume 114, 2016, Pages 32-41, ISSN 0921-3449, https://doi.org/10.1016/j.resconrec.2016.06.020.
	Additional readings:
	Homhuel, S. (2019). Solid Waste Administration of Bangkok Metropolitan. Available online: https://repository.rmutr.ac.th/handle/123456789/1459
	GGGI (2021). Thailand Country Planning Framework (CPF) 2022-2026. Available online: https://gggi.org/wp-content/uploads/2023/02/GGGI-Thailand-CPF_FIN-compressed.pdf
	Reuters (2018). Thailand is new dumping ground for world's high-tech trash. Available online: https://www.reuters.com/article/us-thailand-pollution-ewaste/thailand-is-new-dumping-ground-for-worlds-high-tech-trash-police-say-idUSKCN1IV0T9
	OECD (2022). Marine plastics pollution in Thailand. Available online: https://www.oecd.org/ocean/topics/ocean-pollution/marine-plastics-pollution-Thailand.pdf
