# Supplementary material
Source: MDPI journal article supplement (https://www.mdpi.com/2813-0391/2/1/6)
Supplement: s1 [file s1 › WMS-DSC_Tool_2023_Brunei.xlsx]

## Sheet: Results Overview
Overview of the results for the assessment of City, Country regarding								Overview of the results for the assessment of City, Country regarding
Governance, Sector and Market								Collection and Transport, Waste Disposal, Energy Recovery, Waste Recycling, Prevention and Reuse
		Stage 1	Stage 2	Stage 3	Stage 4	Stage 5				Stage 1	Stage 2	Stage 3	Stage 4	Stage 5
Governance	G.1 Duties and targets							Collection and transport	CT.1 Waste collection
	G.2 Laws, Regulations and Agreements								CT.2 Service provider
	G.3 Nomenclature								CT.3 Collection rates
	G.4 National level WM								CT.4 Separate collection
	G.5 Regional level WM								CT.5 Collection of recyclables
	G.6 Municipal level WM								CT.6 Waste transport
	G.7 Stakeholder cooperation								CT.7 Transfer stations
	G.8 Control mechanisms								CT.8 Collection of hazardous wastes
	G.9 Authorization and public participation							Waste disposal	WD.1 Waste disposal
	G.10 Quality standards and threshold values								WD.2 Operational measures
	G.11 Data collection, reporting and evaluation								WD.3 Leachate water management
	G.12 Education								WD.4 Landfill gas management
	G.13 Research								WD.5 Other means of disposal
	G.14 Awareness building							Energy recovery	ER.1 Thermal disposal and energy recovery
	G.15 Occupational health and safety								ER.2 Incineration plants
	G.16 Environmental protection								ER.3 Energy and raw material recovery
Sector and Market	SM.1 Sector development							Waste recycling	WR.1 Waste recycling
	SM.2 Jobs								WR.2 Composting
	SM.3 Informal sector								WR.3 Fermentation
	SM.4 WM system structure and organization								WR.4 Sorting and recycling plants
	SM.5 Financial funding								WR.5 Refuse derived fuel
	SM.6 Enterprises								WR.6 Recycling of construction and demolition waste
	SM.7 Recycling market								WR.7 Recycling rates
									WR.8 Diversion rate and Circular material use rate
								Prevention and reuse	PR.1 Prevention
									PR.2 Circular business and usage models
									PR.3 Product design
									PR.4 Process optimization and operational disposal strategies
									PR.5 Waste generation
									PR.6 Zero-waste index
								m	Subcomponent is met
								pm	Subcomponent is partly met
									Subcomponent is not met or data is not available

## Sheet: Collection and Transport
	Stage 1		Stage 2		Stage 3		Stage 4		Stage 5		Rationale / Source
Collection and transport (CT.1 - CT.8)
CT.1	CT.1.1.1 Lack of systematic collection; limited collection	nm	CT.1.2.1 Collection is systematic, but inefficient	pm	CT.1.3.1 Efficient collection through optimizing measures and concepts	pm	CT.1.4.1 Underground systems in public spaces	nm	CT.1.5.1 Waste bins have no negative effect on landscape	nm	CT.1.2.1 + CT1.2.3 + CT1.2.4 + CT1.3.1 + CT.1.3.2 + CT1.3.3 --> pm; CT1.2.2 --> m - House to house collection especially in Brunei Muara and Kampong Air, service provided by registered private waste collection companies with electrical waste compactors and skips (1). The households were provided with company's waste bin upon registeration. In 2022, there are 24 companies registered, where they pr…
	CT.1.1.2 Lack of uniform collection bins	nm	CT.1.2.2 Use of uniform aboveground systems	m	CT.1.3.2 Use of new bin systems (e.g. waste locks)	pm	CT.1.4.2 Waste bins with fill level sensors	nm	CT.1.5.2 Avoid of container overfilling (smart bins)	nm
			CT.1.2.3 Collection points are within 200m distance	m	CT.1.3.3 Service provision of cleaning up bins	pm	CT.1.4.3 Introduction of digitalization measures	nm	CT.1.5.3 Smart waste container separation	nm
	CT.1.1.3 Missing of basic principles of urban hygiene, major littering exists	nm	CT.1.2.4 Urban hygiene principles are partially met, but littering in public spaces remains a problem	pm					CT.1.5.4 Full maintainance of urban hygiene principles and no littering in public spaces	nm
CT.2	CT.2.1.1 Collection mostly by waste pickers	nm	CT.2.2.1 Collection mostly by formal sector	pm	CT.2.3.1 Collection mostly by formal or organized informal sector	pm			CT.2.5.1 Waste collection exclusively by formal sector	nm	CT.2.2.1 + CT.2.3.1 --> pm (1) 26 % of public sector haulers, 34% of registered and approved hauler and 40% of unregistered haulers. Informal sector involve in collection, transportation and disposal of emerging waste stream (4)
CT.3	CT.3.1.1 Collection rate (CR): urban ≤ 50% OR no data	nm	CT.3.2.1 CR: urban > 50 and ≤ 70%	nm	CT.3.3.1 CR: urban > 70 and ≤ 80%	nm	CT.3.4.1 CR: urban > 80 and ≤ 95%	m	CT.3.5.1 CR: urban > 95% and ≤ 100%	nm	CT.3.3.1 --> pm there is no rural collection rate available - however, it was estimated that in Urban Area of Brunei at the rate of 90% of Waste collected. (4)
	rural ≤ 30% OR no data	m	rural > 30 and ≤ 50%	na	rural > 50 and ≤ 80%	na	rural > 80 and ≤ 95%	na	rural > 95% and ≤ 100%	na
CT.4	CT.4.1.1 Collective collection of residual waste	m	CT.4.2.1 First forms of separation at source collection (2 fractions)	pm	CT.4.3.1 Mandatory waste collection for households and businesses (>3 fractions)	pm	CT.4.4.1 Reduction of illegal collection (e.g. electronics)	nm	CT.4.5.1 All recyclables are collected separately	nm	CT.4.2.2 + CT4.2.1 + CT4.2.3.2 + CT 4.3.1 + CT.4.3.2 --> pm; CT4.1.1 + CT4.2.3 + CT.4.3.4 --> m; Informal sector is involving in waste collection, particularly for recycable waste (4); separate waste colelction of hospital waste and according to the international standards of hospital waste and Guideline on Health care waste (5). For other type of waste such as C&D, it was covered by waste collec…
	CT.4.1.2 Recyclables solely collected by waste pickers	pm	CT.4.2.2 Recyclables collected by (in)formal sector	pm	CT.4.3.2 Set up of recycling centers	pm
					CT.4.3.3 Rate of incorrect sorting > 30%	na	CT.4.4.2 Rate of incorrect sorting > 10 to ≤ 30%	na	CT.4.5.2 Rate of incorrect sorting ≤ 10%	na
			CT.4.2.3 Separate collection of hospital waste	m	CT.4.3.4 Separate collection of: electrical, construction, demolition, agricultural and forestry waste	pm
CT.5	CT.5.1.1 CR are missing, only estimations are available or data is not publicly available	m	CT.5.2.1 Recyclables CR:		CT.5.3.1 Recyclables CR:		CT.5.4.1 Recyclables CR:		CT.5.5.1 Recyclables CR:		CT.5.1.1. Information is not available
			Metals: ≤ 50%	na	Metals: > 50 and ≤ 70%	na	Metals: > 70 and ≤ 90%	na	Metals: > 90%	na
			Paper: ≤ 30%	na	Paper: > 30 and ≤ 70%	na	Paper: > 70 and ≤ 90%	na	Paper: > 90%	na
			Glass: ≤ 30%	na	Glass: > 30 and ≤ 70%	na	Glass: > 70 and ≤ 90%	na	Glass: > 90%	na
			Organics: ≤ 30%	na	Organics: > 30 and ≤ 70%	na	Organics: > 70 and ≤ 90%	na	Organics: > 90%	na
			Plastics : ≤ 10%	na	Plastics: > 10 and ≤ 50%	na	Plastics: > 50 and ≤ 90%	na	Plastics: >90%	na
			Textiles: ≤ 10%	na	Textiles: > 10 and ≤ 50%	na	Textiles: > 50 and ≤ 90%	na	Textiles: >90%	na
CT.6	CT.6.1.1 Formal: Only use of simple vehicles	nm	CT.6.2.1 Formal: Mostly use of large fleets and automation	m	CT.6.3.1 Formal: Waste firms improve vehicle fleets (incl. compactors, lifters).	m	CT.6.4.1 Use vehicles depending on waste type	nm	CT.6.5.1 Higly engineered and fully automated vehicles	nm	CT.6.3.1 + CT.6.3.2. --> m; CT.6.2.2 + CT.6.3.2 --> pm : registered waste collection service companies, used compactors and skips (1; 6) However, there is no further information on informal sector vehicles use - but similar expectation to Malaysia and Singapore.
	CT.6.1.2 Informal: Only use of pack animals, handcarts, etc.	nm	CT.6.2.2 Informal: Mostly use of small or modified vehicles	pm	CT.6.3.2 Informal: Mostly use of modernized small trucks	pm	See WM 3.4.1
CT.7	CT.7.1.1 Direct transport of waste to landfills or dumps	nm	CT.7.2.1 Introduction of transfer stations (TS)	m	CT.7.3.1 TS increase collection efficiency	pm			CT.7.5.1 All existing TS are state of the art	nm	CT.7.3.1 --> m; CT.7.3.1 + CT. 7.3.2 --> pm: Sungai Akar transfer Station - also E-waste collection Depo (for the general public only) Sungai Akar Transfer Station. Currently Enviro Idaman is doing waste operation in the whole of Brunei Darussalam. One of the facilities that operated by EnviroIdaman is waste transfer station which located at Sungai Akar. This transfer station received about 350 t…
	CT.7.1.2 Roads used as transfer areas for waste	nm	CT.7.2.2 Simple TS are unrestricted accessible to public	nm	CT.7.3.2 Advanced TS with restricted access to public.	pm
CT.8	CT.8.1.1 Lack of separate collection of hazardous waste (HW) from households	pm	CT.8.2.1 Small HW quantities from households are collected separatly	pm	CT.8.3.1 Disposal of small quantities of HW is free of charge	na	CT.8.4.1 Full collection of HW flows	na	CT.8.5.1 HW quantities are reduced to a minimum	na	CT.8.1.1; CT.8.1.2 + CT.8.2.1 + CT. 8.3.2 --> pm; Service providers also covered the industrial waste - hazardous waste (2) however, due to the inadequate of presents countrol or ignorance, it could be asuumed that the direct disposal of HW without proper treatment maybe occured (8).
	CT.8.1.2 Lack of separate collection of industrial HW	pm			CT.8.3.2 Industrial HW is collected almost separately	pm
m	fully met
pm	partially met
nm	not met
na	not available

## Sheet: Waste Disposal
	Stage 1		Stage 2		Stage 3		Stage 4		Stage 5		Rationale / Source
Waste disposal (WD.1 - WD.5)
WD.1	WD.1.1.1 Lack of targeted and centralized waste disposal	nm	WD.1.2.1 Targeted and centralized waste disposal in minimum controlled landfills	m	WD.1.3.1 Introduction of landfill classes	nm	WD.1.4.1 Mineral waste is predominantly landfilled	na	WD.1.5.1 Waste landfilling gets less important	nm	WD.1.2.1 + WD1.2.3. + WD.1.3.4 --> m; WD.1.3.2. pm: There is no information documented regarding open burning activities in Bandar Seri. The sanitary landfill is recently contructed and operated - most of the waste are diposed there. About 400-500 tonnes of waste goes to Sungai Paku Landfill daily, where the landfill is expected to be used up by 2025 [9]
	WD.1.1.2 Disposal in open dumps, uncontrolled landfills, roads etc.	nm	WD.1.2.2 Open burning and dumping is illegal, but still practiced	na	WD.1.3.2 Non-hazardous and hazardous waste are no longer disposed together	pm	WD.1.4.2 Recyclables are rarely landfilled	na	WD.1.5.2 Small quantities of waste are landfilled	nm
	WD.1.1.3 Open burning for eliminiation and energy recovery	nm			WD.1.3.3 Liquid waste is no longer disposed in landfills	nm	WD.1.4.3 After-use of landfills gets more relevant	nm	WD.1.5.3 Reuse of closed landfill areas for other purposes	nm
					WD.1.3.4 Conversion of (in)active landfills to sanitary standard.	m	WD.1.4.4 Waste is disposed exclusively on sanitary landfills	nm	WD.1.5.4 Importance of rehabilitation of old landfills	nm
							WD.1.4.5 Safe disposal of disaster waste on approved sites	na	WD.1.5.5 Full avoidance of illegal dumping	nm
	WD.1.1.4 Open dump and controlled dump predominate	nm	WD.1.2.3 Controlled or engineered landfill predominate	m			WD.1.4.6 Sanitary landfill predominates	nm	WD.1.5.6 All (in)active landfills have sanitary landfill standard	nm
WD.2	WD.2.1.1 Lack of disposal controls (waste registration)	nm	WD.2.2.1 Registration of waste type, etc. before disposal	pm	WD.2.3.1 Registration and compaction of waste are the norm	pm			WD.2.5.1 All existing and new landfills comply with the current state of art	nm	WD.2.2.1 + WD.2.2.2 + WD.2.2.3 + WD.2.2.4 + WD.2.2.5 + WD.2.3.4 --> pm; WD.3.1.1 + WD.3.1.2 + WD.3.2.1 + WD.3.2.2 + WD.3.2.3 --> pm; WD.4.1.1. + WD.4.2.1 --> pm: The new sanitary landfill ensures all the waste dispose there meet the minimum sanitary landfill standards. Sungai Paku Engineered Landfill. Besides operating Sungai Akar Transfer Station, Enviro Idaman also has been operating the one an…
	WD.2.1.2. Waste is burned on dumping sites	nm	WD.2.2.2 Waste burning on landfill sites is missing	pm	WD.2.3.2 Systematic pre-treatment of waste is mandatory	na
	WD.2.1.3 Landfill access controls are lacking or inadequate	nm	WD.2.2.3 Compaction and daily cover of waste	pm	WD.2.3.3 Systematic landfill management is carried out	pm
			WD.2.2.4 Site drawing showing landfill boundary and filling area in place	pm	WD.2.3.4 Realization of measures for (post-)closure management	nm
	WD.2.1.4 Dumping sites are not staffed or only in short times for site checking	nm	WD.2.2.5 Site is staffed during operational hours	pm
WD.3	WD.3.1.1 Leachate infiltrates soil or evaporates	pm	WD.3.2.1 Available leachate collection	pm	WD.3.3.1 Leachate collection and treatment in all active landfills	pm	WD.3.4.1 Compliance of strict limits at water monitoring	na	WD.3.5.1 Decrease of leachate and toxicity	nm
	WD.3.1.2 Lack of surface and groundwaster monitoring	pm	WD.3.2.2 Recirculation of leachate in the landfill body	pm
			WD.3.2.3 Surface and groundwater is monitored	pm
WD.4	WD.4.1.1 Landfill gas is released into the atmosphere	pm	WD.4.2.1 Implementation of passive collection or flaring of landfill gas	pm	WD.4.3.1 Landfill gas collection for energy recovery and gas monitoring	nm	WD.4.4.1 Compliance of strict limits for gas monitoring	na	WD.4.5.1 Controlled flaring of landfill gas only in emergencies and when it is unprofitable (small gas quantities)	nm
WD.5	WD.5.1.1 Waste burning or dumping on high seas and coastal waters	na			WD.5.3.1 Waste burning or dumping on high seas and coastal waters is prohibited, but still takes place	na			WD.5.5.1 Avoidance of waste burning or dumping on high seas and coastal waters	nm	na - no information documented regarding open burning in Bandar Seri
m	fully met
pm	partially met
nm	not met
na	not available

## Sheet: Energy Recovery
	Stage 1		Stage 2		Stage 3		Stage 4		Stage 5		Rationale / Source
Energy Recovery (ER.1 - ER.3)
ER.1	ER.1.1.1 Controlled energy recovery or thermal disposal is missing	pm	Availability of organizational criteria:		ER.1.3.1 ER is used to treat large waste quantities of the city inside or outside the country	nm	ER.1.4.1 ER is essential treatment alternative	nm	ER.1.5.1 Incinerated waste amount decreases due to higher recycling rates	nm	ER.1.1.1 + ER.1.2.3 + organizational criteria --> pm: Bandar Seri - Brunei has the basic components of the organizational criteria that is suitable for establishing incineration plant. The government is also considering having such plan in the upcoming year - in order to reduce the pressure on the current sanitary landfill lifespans.Brunei's Sungai Paku Engineered Landfill site, which covers 104 …
			I) controlled landfills	m	ER.1.3.2 Agreements regulate waste delivery, energy sales and pricing	nm
			II) qualified staff	m	ER.1.3.3 At least 150.000 tons/y of suitable waste are available for incineration	pm	ER.1.4.2 Lower heating value has to be at least 11 MJ/kg	nm
			III) systematic collection	m
			IV) Sorting at source is implemented	nm
			V) Basic WM laws and rules are developed	m
			VI) Incineration plants are positioned in political plans	m
			VII) Political and social will is given	m
			VIII) Total costs for the plant are secured	m
			IX) Public or private actors are experienced in managing incineration plants efficiently	m
			X) Spare parts can be purchased locally or imported	m
			Availibility of technical criteria:
			I) stable supply of combustible waste	pm
			II) lower heating value at least 7 MJ/kg	pm
			III) Bottom and fly ash can be treated safely	na
	ER.1.1.2 Co-incineration of waste is missing	pm	ER.1.2.3 Co-incineration of specific waste or RDFs in industrial firing plants	pm	ER.1.3.4 ER as alternative for landfilling; energy-intensive industries often make use of it	nm
ER.2	ER.2.1.1 Waste incinerators are neither operating or planned in the country	m	ER.2.2.1 Incineration plants (incl. flue gas cleaning - FGC) are in planning or construction in the country or simple incineration plants without FGC are in operation with engineered process controls (incl. continous monitoring and recording of operating parameters)	nm	ER.2.3.1 Operation of waste incinerators with FGC	nm	ER.2.4.1 High-tech and state of the art processes ensure reliability and safe emission elimination	nm	ER.2.5.1 Automatic and homogenous waste input	nm	ER.2.1.1 --> m : There is no existing incineration plant in Bandar Seri - Brunei, however the inciernation is in planned from the government waste management plan [12]
					I) Continuous monitoring of operating parameters and emissions	nm	ER.2.4.2 Flue gas controls compliant with applicable environmental standards	nm
					II) Monitoring systems are routinely calibrated	nm
					III) Maintenance plans or schedules are in place	nm
					IV) Evidence that equipment is well maintained	nm
					V) Fire extinguishers available on site	nm
ER.3	ER.3.1.1 Raw material and ER through controlled waste incineration is missing	nm	ER.3.2.1 Possible recovery of energy through waste incineration	nm	ER.3.3.1 Selling of recovered energy (electrical, thermal, combination)	nm			ER.3.5.1 Increased replacing of primary energy resources	nm
					ER.3.3.2 Incineration or RDF plants are located in areas with moderate heat demand and good transport and energy infrastructure exists	nm
			ER.3.2.2 Recycling of incineration residues is missing	na	ER.3.3.3 Recovered metals from incineration process are sold; other by-products are treated safely, but recycled rarely	nm	ER.3.4.1 Increased recycling and reuse of slags	nm	ER.3.5.2 Almost complete reintroduction of by-products from incineration into the economic cycle	nm
m	fully met
pm	partially met
nm	not met
na	not available

## Sheet: Waste Recycling
	Stage 1		Stage 2		Stage 3		Stage 4		Stage 5		Rationale / Source
Waste recycling (WR.1 - WR.8)
WR.1	WR.1.1.1 Material recycling is rarely done, but open-loop recycling and downcycling predominate	pm			WR.1.3.1 Extension of waste treatment by mechanical, biological, etc. treatment options	pm	WR.1.4.1 (Semi-)closed-loop recycling and upcycling increase	nm	WR.1.5.1 (Semi-)closed-loop recycling dominates	nm	WR.1.1.1 + WR.2.1.1 +WR.1.3.1 + WR.1.3.2 --> pm; WR.2.1.1 + WR2.2.1 + WR.2.2.2 --> pm: There is a compost campaign however, it is very small scale and organic waste is still dispose at landfill or animal feed. The country has exceeded its initial target of 20% recycling rate by 2020, with the current rate to-date at 25%. The target is to achieve a recycling rate of 30% by 2035. Green Brunei Green…
							WR.1.4.2 Dialogues between manufactures and recyclers take place to identify and solve recycling problems	nm	WR.1.5.2 Implementation of circular bioeconomy	nm
	WR.1.1.2 Ensured input for recycling plants is lacking	pm			WR.1.3.2 Input for recycling plants is partly ensured	pm	WR.1.4.3 Input for recycling plants is fully ensured	nm		nm
WR.2	WR.2.1.1 Organic waste is landfilled or is composted at home or used as animal food	pm	WR.2.2.1 Recycling of organics in simple or open composting plants or with mobile aggregates	pm	WR.2.3.1 Introduction of static, closed composting in tunnels / containers with sorting technologies	nm	WR.2.4.1 Integration of (quasi-) dynamic processes in existing plants	nm	WR.2.5.1 Microplastics is removed from compost	nm
			WR.2.2.2 Compost has low compost quality	pm	WR.2.3.2 Increased use of compost in agriculture & landscape management	nm	WR.2.4.2 High quality compost, which still contains microplastic	nm	WR.2.5.2 Very high quality and purity level of compost	nm
							WR.2.4.3 Increased use of compost in the private sector	nm		nm
WR.3	WR.3.1.1 No planned or operation fermentation plants	nm	WR.3.2.1 Planning or construction of fermentation plants	na	WR.3.3.1 Fermentation plants recycle organics	nm		nm	WR.3.5.1 Biogas plants are an essential component of CE	nm	na- no information regarding fermentation plant
					WR.3.3.2 Separation of impurities for energetical use of biogas (e.g. in combined heat and power plants)	nm	WR.3.4.1 Introduction of CO2-separation stage at plants	nm		nm
							WR.3.4.2 Feeding of biomethan into the natural gas grid	nm		nm
					WR.3.3.3 Fermentation residues are used as fertilizers	nm	WR.3.4.3 Very high quality of digestates	nm	WR.3.5.2 Mostly full removal of microplastics from digestates	nm
WR.4	WR.4.1.1 Manual sorting of recyclables	pm	WR.4.2.1 Partially automated sorting of recyclables (incl. shredding and separation units)	pm	WR.4.3.1 Increase of sorting efficiencies through mechanical separation, screening aggregates	nm	WR.4.4.1 Generation of high-quality fractions through modern sorting facilities	nm	WR.4.5.1 Increasingly digitalized recycling technologies	nm	WR.4.1.1. + WR.4.1.2. + WR.4.2.1 --> pm : Daikyo Environmental Recycling Sdn Bhd (DER) DER has established itself as a leading player in the recycling industry in Brunei Darussalam. The company operates a one-stop supply centre for the collection and recycling of ferrous and non-ferrous scrap metals, papers, plastics, e-waste and nylon bags [16] Recycling is still in its infant stage in Brunei Da…
	WR.4.1.2 Inefficient recovery of valuable materials from electronic waste	pm	WR.4.2.2 Recovery of metals and RDFs in mechanical-biological plants	na	WR.4.3.2 Generation of high quality mono-fractions	nm		nm	WR.4.5.2 Increasing use of digitalization measures to rise recyclability of products	nm
					WR.4.3.3 Use of stabilate processes to separate metals and RDFs	nm	WR.4.4.2 Production of methanol or synthesis gas from raw material plastic recycling	nm		nm
								nm	WR.4.5.3 Safe recycling of waste containing harmful substances	nm
WR.5	WR.5.1.1 Lack of RDFs recovery from waste	pm	WR.5.2.1 Start of RDF recovery from waste treatment plants	na	WR.5.3.1 Increasing recovery of RDFs from waste	nm		nm	WR.5.5.1 RDF is decreasing due higher closed loop recycling	nm
WR.6	WR.6.1.1 Only conventional demolition of buildings	pm	WR.6.2.1 Mostly conventional demolition of buildings	pm	WR.6.3.1 Semi-selective demolition occurs predominantly	nm	WR.6.4.1 Predomination of selective demolition	nm	WR.6.5.1 Only selective demolition occurs	nm
	WR.6.1.2 Depollution is done rarely	pm	WR.6.2.2 More frequent de-pollution	pm			WR.6.4.2 Depollution is usual practice in demolition	nm		nm
	WR.6.1.3 C&D waste disposal on landfills/dumps predominates	pm	WR.6.2.3 Rare use of C&D material as filler or surface excavations	pm	WR.6.3.2 Increased use of C&D materials as filler or for landfill construction	nm	WR.6.4.3 Increased high quality recycled construction material	nm	WR.6.5.2 Almost complete recycling of C&D waste, little is landfilled	nm
					WR.6.3.3 Emerging of recycling routes for C&D materials (road construction)	nm	WR.6.4.4 Thermal treatment or landfilling of non-recyclable construction materials	nm	WR.6.5.3 Prohibition of non-recyclable materials for construction	nm
							WR.6.4.5 Use of robotics for efficient sorting	nm		nm
WR.7	WR.7.1.1 Precise recycling rate numbers are missing	m	WR.7.2.1 Recycling rates:		WR.7.3.1 Recycling rates:		WR.7.4.1 Recycling rates:	na	WR.7.5.1 Recycling rates:	na	WR.7.1.1 --> m: & WR8. na - no information available regarding the recycling rate for specific material streams however, it was mentioned that Brunei has reached it recycling rate target [12,13]
			Metals: ≤ 40 %	na	Metals: > 40 and ≤ 70 %	na	Metals: > 70 and ≤ 90 %	na	Metals: > 90 %	na
			Paper: ≤ 40 %	na	Paper: > 40 and ≤ 70 %	na	Paper: > 70 and ≤ 90 %	na	Paper: > 90 %	na
			Glass: ≤ 40 %	na	Glass: > 40 and ≤ 70 %	na	Glass: > 70 and ≤ 90 %	na	Glass: > 90 %	na
			Composites: ≤ 20 %	na	Composites: > 20 and ≤ 60 %	na	Composites: > 60 and ≤ 90 %	na	Composites: > 90 %	na
			Plastics: ≤ 20 %	na	Plastics: > 20 and ≤ 60 %	na	Plastics: > 60 and ≤ 90 %	na	Plastics: > 90 %	na
			WR.7.2.2 Recycling rates:		WR.7.3.2 Recycling rates:		WR.7.4.2 Recycling rates:		WR.7.5.2 Recycling rates:
			E-Waste: > 10 and ≤ 40 %	na	E-Waste: > 40 and ≤ 70 %	na	E-Waste: > 70 and ≤ 90 %	na	E-Waste: > 90 %	na
			C&D waste: > 10 and ≤ 40 %	na	C&D waste: > 40 and ≤ 70 %	na	C&D waste: > 70 and ≤ 90 %	na	C&D waste: > 90 %	na
WR.8	WR.8.1.1 CMUR: ≤ 1 % OR no data	m	WR.8.2.1 CMUR: > 1 % ≤ 10 %	na	WR.8.3.1 CMUR: > 10 % ≤ 30 %	na	WR.8.4.1 CMUR: > 30 % ≤ 70 %	na	WR.8.5.1 CMUR: > 70 %	na
	WR.8.1.2 DR: ≤ 0,1 OR no data	m	WR.8.2.2 DR: > 0,1 ≤ 0,2	na	WR.8.3.2 DR: > 0,2 ≤ 0,4	na	WR.8.4.2 DR: > 0,4 ≤ 0,7	na	WR.8.5.2 DR: > 0,7 ≤ 1,0	na
m	fully met
pm	partially met
nm	not met
na	not available

## Sheet: Prevention and Reuse
	Stage 1		Stage 2		Stage 3		Stage 4		Stage 5		Rationale / Source
Prevention and reuse (PR.1 - PR.6)
PR.1	PR.1.1.1 Prevention is motivated by poverty	nm	PR.1.2.1 Prevention is motivated by lack of resources	m					PR.1.5.1 Decoupling of GDP and waste generation	nm	PR.1.2.1 + PR.1.3.3 + PR.1.4.1 --> pm; PR.1.3.1 + PR.1.3.2 --> m: ‘No Plastic Bag Everyday’, ‘Plastic Bottle Free’ and ‘Reduce The Use of Styrofoam’ initiatives. One of Brunei Darussalam’s efforts to reduce waste is through the introduction of the 3R (Reduce, Reuse and Recycle) concept. In its move to combat plastic pollution, particularly on single-use plastics, JASTRe introduced the ‘No Plastic…
					PR.1.3.1 Higher political priority for food waste issues	pm	PR.1.4.1 Formulation of food waste avoidance targets and implementation of measures	m	PR.1.5.2 Food waste is reduced to a minimum	nm
					PR.1.3.2 Few disposables are banned or permitted exceptionnally	pm	PR.1.4.2 All disposables are banned or permitted exceptionnally	nm	PR.1.5.3 CE reduces negative impacts of materials and products by avoiding resources or waste	nm
							PR.1.4.3 Prohibited destruction of unsold durable goods	nm	PR.1.5.4 Increase of bans for substances and products	nm
					PR.1.3.3 Emerging initiatives to educate the population regarding closing-loops	m			PR.1.5.5 CE provides long use of raw materials in the cycle	nm
							PR.1.4.4 Ensured lifetime-extension of buildings before construction	nm	PR.1.5.6 Full deconstruction of buildings is ensured before their realization	nm
									PR.1.5.7 Consumption decisions based on waste prevention	nm
PR.2	PR.2.1.1 Lack of circular business and usage models	pm	PR.2.2.1 Spare parts of End-of-life (EoL) products are used for repair	pm	PR.2.3.1 Increased use of EoL spare parts	pm			PR.2.5.1 Permanent provision of spare parts through digitalization	nm	PR.2.1.1 + PR.3.1.1 + PR.3.1.2 + PR.3.1.3 + PR.2.2.1 + PR.2.2.2 + PR.2.3.1 + PR.2.3.2 + PR. 2.3.4 + PR.2.3.5 + PR.4.2.1 --> pm; The circular business model is newly intruduced and adopted among ASEAn countries. However, in term of implimentation, there are still big gap connection between industries and government to move forward CE [17]. There are number of repair shops e.g electronic equipments…
					PR.2.3.2 Small use of professional repair by small part of the population	pm	PR.2.4.1 High use of professional repair by big part of the population	nm		nm
					PR.2.3.3 Minimum one online spare market exists	pm	PR.2.4.2 Various online spare markets exist	nm	PR.2.5.2 Spare part markets are an integral part of CE	nm
					PR.2.3.4 Product service systems (sharing and leasing) are offered	pm			PR.2.5.3 Sharing and leasing are an integral part of CE	nm
			PR.2.2.2 Voluntary take-back systems for certain wastes (e.g. pharmaceuticals, batteries) exist	pm	PR.2.3.5 Introduction of take-back or deposit systems for certain wastes (e.g. beverage packaging)	pm	PR.2.4.3 Deposit obligation to all single-use beverage packaging and change of deposit contribution	nm	PR.2.5.4 Innovative take-back and collection systems enable reuse and high-quality recycling	nm
							PR.2.4.4 Introduction of deposits on material relevant products (e.g. tablets, smartphones)	nm		nm
PR.3	PR.3.1.1 Companies neglect EoL issues of their products	pm	PR.3.2.1 Pioneer companies are considering EoL issues of their products	pm	PR.3.3.1 Through Eco-design several manufacturers are producing in a more environmental friendly way	pm	PR.3.4.1 Increased use of homogenous easy separable, harmfree and secondary materials; less use of disruptive substances	nm	PR.3.5.1 High use of secondary, recyclable or biobased materials for product manufacture	nm
	PR.3.1.2 Innovative composite materials are causing disposal problems due to the negligence of EoL in the product design phase	pm					PR.3.4.2 Recyclability, durability and upgradability is generally considered in product design phase	nm	PR.3.5.2 EoL concepts for innovative products prior to market introduction are elaborated to minimize problems at the EoL phase	nm
	PR.3.1.3 Companies neglect recyclability, material saving and substitution of hazardous substances during product design phase	pm	PR.3.2.2 Some companies consider recyclability, material savings and substitution of hazardous substances in product design phase	pm					PR.3.5.3 Product recyclability is one basic condition for product marketing	nm
							PR.3.4.3 Increasing life cycle assessment of products	na	PR.3.5.4 Almost all companies consider all life cycle phases	nm
					PR.3.3.2 Pioneer companies set voluntarly a minimum use rates for secondary resources in their products	na	PR.3.4.4 Legal minimum use rates for recyclates in plastic products: between ≥ 30 % and < 60 %	na	PR.3.5.5 Legal minimum use rates or recyclates in plastic products: ≥ 60 %	nm
PR.4	PR.4.1.1 Neglection of issues for proper waste disposal and waste avoidance in companies	na	PR.4.2.1 Pioneer companies consider issues as improving their waste disposal and prevent waste	pm	PR.4.3.1 Evaluation of production processes	na	PR.4.4.1 Inreased investigation of resource efficiency potentials	na	PR.4.5.1 Waste avoidance and closing loops practice in companies	nm
					PR.4.3.2 Substitution of some hazardous materials with non or less hazardous materials	na	PR.4.4.2 Several companies are substituting hazardous with non-hazardous substances	na	PR.4.5.2 Use of pollutants in CE, if controlled circulation considering thresholds is ensured	nm
PR.5	PR.5.1.1 WG: ≥ 2 kg/cap + d	na	PR.5.2.1 WG: ≥ 1,5 < 2 kg/cap + d	nm	PR.5.3.1 WG: ≥ 1 < 1,5 kg/cap + d	m	PR.5.4.1 WG: ≥ 0,5 < 1 kg/cap + d	na	PR.5.5.1 WG: < 0,5 kg/cap + d	nm	PR.5.3.1 --> m: Department of Environment, Parks and Recreation (JASTRe) To achieve sustainable environmental management, JASTRe targets to reduce waste generation per capita, currently at 1.15 kilogram per capita per day - The Government aims to reduce this to 1 kilogram per capita per day by 2035.
PR.6	PR.6.1.1 ZWI: ≤ 0,05	nm	PR.6.2.1 ZWI: > 0,05 ≤ 0,15	m	PR.6.3.1 ZWI: > 0,15 ≤ 0,4		PR.6.4.1 ZWI: > 0,4 ≤ 0,9	na	PR.6.5.1 ZWI: ≥ 0,9	nm	PR.6.2.1. --> m: Brunei Draussalam categorized in low zero waste index <0.15 [17]
m	fully met
pm	partially met
nm	not met
na	not available

## Sheet: References
No	Title	Author	Note	Year
	Voluntary National Review Report of Brunei Darussalam	Ministry of Finance and Economy	Society for Community Outreach and Training (SCOT) a NGO conducting a SCOT Ummi Bags: An initiative to raise funds by selling merchandise (a shopping tote bag) to support and empower single mothers through start-up capital for their entrepreneurial ideas. It is also an initiative to reduce plastic waste as these Ummi Bags are reusable. This initiative was in partnership with Hoco Agency, a local …	2020	Report
			Department of Environment, Parks and Recreation (JASTRe) To achieve sustainable environmental management, JASTRe targets to reduce waste generation per capita, currently at 1.15 kilogram per capita per day - The Government aims to reduce this to 1 kilogram per capita per day by 2035. In this regard, the Solid Waste Management Strategy set out by JASTRe aims to address and manage waste issues in B…
			These include the introduction of the ‘No Plastic Bag Everyday’, ‘Plastic Bottle Free’ and ‘Reduce The Use of Styrofoam’ initiatives. One of Brunei Darussalam’s efforts to reduce waste is through the introduction of the 3R (Reduce, Reuse and Recycle) concept. The country has exceeded its initial target of 20% recycling rate by 2020, with the current rate to-date at 25%. The target is to achieve a…
			In its move to combat plastic pollution, particularly on single-use plastics, JASTRe introduced the ‘No Plastic Bag Weekend’ initiative in 2011, covering Saturdays and Sundays. Carrying the slogan ‘It Takes a Nation to End Plastic Pollution’, it has resulted in major department stores reporting a steady decrease of a 12% monthly average, with a reduction difference of 77% in plastic bag use betwe…
			The Municipal Department is also strictly enforcing proper disposal of waste particularly in public areas, whereby it imposes heavy penalties for those found to be illegally dumping their waste in these areas.
			Green Brunei Green Brunei, a social enterprise established in 2012, aims to promote environmental sustainability through youth-led initiatives in the fields of education, conservation and advocacy. Their initiatives to ensure responsible consumption in Brunei Darussalam include:  Organising recycling competitions and regular recycling drives;  Setting up a Green Depot in Kuala Belait, as a ‘was…
			GHG Waste sector 2.18% in 2018
	Recycle 123 Handbook	Ministry of Development	About 400-500 tonnes of waste goes to Sungai Paku Landfill daily, where the landfill is expected to be used up by 2025	2015
			1.4 kg/cap/day waste generation (36% food waste; 18% paper; 16% plastic)
			Aims to achieve recycling rate of 15% by 2020
	Integrated and sustainable solid waste management for Brunei Darussalam	S. Shams*, R. H. M. Juani*, Z. Guo	the total waste produced, 70% goes directly to Brunei’s six landfills, a meagre 2% is used for making compost, and the rest is disposed of in other conventional ways.
			36% of food waste; 55% (paper, plastic, metal, glass, wood and textiles)
			Landfills, is the most popular waste disposal method in Brunei
			To date the country has disposed of all of its waste at six landfill sites split across four districts: Brunei-Muara, Tutong, Belait and Temburong.
			The total waste generated in the year 2005 (188,000 ton) [15] and 2014 (214,475 ton as calculated based on present study)
			However, the current generation of landfill sites in Brunei is aging, with no leachate treatment or gas collection systems. Clearly this situation is incompatible with the vision of being a top 10 nation in terms of quality of life, with a dynamic and sustainable economy.
			Therefore Brunei has committed itself for an engineered or sanitary landfill which includes a $66.5 million modern waste management facility having an area of 110 hectares at Sungai Paku. It is one of the more advanced engineering landfill projects in the region with a transfer station at Sungai Akar
			The development of a modern waste management system for Brunei began some years ago with the rehabilitation of the Sungai Akar dump site transformed into a public park as phase one. Phase two is under way, and will be implemented in accordance with the highest environmental standards and the best technology available having a daily cover of 150 mm of inert material to reduce odour. As part of the…
			Waste is collected by private and registered waste collection companies through door to door collection at Brunei Muara and Kampong Air (Water Village). Besides, wastes are collected from commercial areas and light industrial areas. The waste collection points as follows: Electrical waste Compactor and skips in Brunei Muara, Skips and bins in Tutong, Bins in Temburong, Skips in Seria and Belait. …
			So, from a local and a global perspective, composting waste in Brunei is an important step towards reducing waste going to landfill and the waste can be utilized in the form rich fertilizers.
			Brunei is practicing a multi-bin collection system for educational institutions, offices, retail establishments and in public places for recovering recyclable cans, bottles and paper
			Brunei, is in the fortunate position of having both the political will and the financial stability to act swiftly and decisively to formulate a strategy for zero waste management. Brunei with its small population can move towards a model for Zero Waste country, serving as a leader to others in the region.
	Country analysis Paper: Brunei Darussalam		1.4 kg/cap/day waste generation (36% food waste; 18% paper; 16% plastic)	2013
			aims to achieve a recycling rate of 15% by 2015 and 20% by 2020.
			Recycling bins for papers, plastics and metals, are a must in all the waste collection centres in the Brunei Muara District (the largest of all the four Districts in Brunei Darussalam that houses almost 80% of the country’s population).
			Waste shredder - to shred wood and timbers extracted from the Brunei river clean up to be used as chippings and composting materials
			This composting initiative is a follow‐up of the small‐scale project undertaken in late 2005 where DEPR initiated composting as a way to reduce the use of organic and nonorganic fertilizers in its routine landscaping works.
			The DEPR also initiated the development of a material recovery facility for used tyres, in the Tutong District (one of the four districts in Brunei Darussalam).
			This initiative involved the engagement of a local company to undertake the shredding of used tyres and separate it to rubber and metal threads as the byproducts that are used for other purposes. This was considered a practical and more appropriate and viable solution, as a first step towards other downstream processes e.g. granulation or producing rubber crumbs, which could thus be utilised for …
			E-Waste account of 1%
			Recycling is still in its infant stage in Brunei Darussalam. In its strive towards an integrated waste management system and towards a zero waste society
			Oil and Gas Industry The economy of Brunei Darussalam is highly dependent on the oil and gas industry. Much of the wastes resulting from this industry are dealt with by the respective companies viz. Brunei Shell Petroleum (BSP), Brunei Liquified Natural and Gas (BLNG) and the Brunei Methanol Company (BMC). In the absence of a full‐scale and proper treatment and disposal facilities for these toxic…
		https://dvi.c09.myftpupload.com/product-services/	E.g of the waste bin from the recycling company
	Solid Waste management in Negara Brunei Darussalam	Ministry of Development		2006	PPT
	Efforts underway to tackle growing waste issue in Brunei	https://www.thestar.com.my/aseanplus/aseanplus-news/2022/02/11/efforts-underway-to-tackle-growing-waste-issue-in-brunei	This includes transforming waste to energy as an alternative to solid waste landfills; skimmer boats, scavenger boats, workboats and collection barges with conveyor belts for the collection of two to four metric tonnes of garbage; and floating debris booms for cleaning drainages.”	2022
	Brunei plans to build waste-to-electricity incinerator plant	https://english.news.cn/asiapacific/20230320/820a0cc08b2245bdb232da6f5c04ef1b/c.html	plans to build a waste incineration plant that can process 800 to 1,000 tons of waste per day to generate electricity	2023
			"With the incorporation of the latest solid waste management technologies, pollution problems such as gas emissions from incinerators can be dealt with as best as possible. This approach also ensures more effective waste management for the next 20 years."
			Brunei's Sungai Paku Engineered Landfill site, which covers 104 hectares and receives 90 percent of the country's waste, is expected to reach its capacity limit by 2030
	Landfill	https://mavrosempire.wixsite.com/enviroidaman	Sungai Akar Transfer Station. Currently Enviro Idaman is doing waste operation in the whole of Brunei Darussalam. One of the facilities that operated by EnviroIdaman is waste transfer station which located at Sungai Akar. This transfer station received about 350 ton of waste daily. Our main operation in that particular transfer station is to compact all waste that comes in to the trailers with th…	2023
			Sungai Paku Engineered Landfill. Besides operating Sungai Akar Transfer Station, Enviro Idaman also has been operating the one and only engineered landfill in Brunei Darussalam which is located in Sungai Paku. Every day, this landfill received approximately around 600 tons of waste per day. Our main operation are to manage traffic flow from the waste truck into the landfill cell daily, compact th…
	Landfill	https://sbr.com.sg/building-engineering/news/st-engineering-secures-665mln-project-in-brunei	The Sungai Paku waste treatment facility is designated to serve as a permanent waste disposal site for Brunei. It will be designed and constructed to the highest environmental standards of the USA Environmental Protection Agency guidelines. The engineered landfill facility will be prepared using heavy duty liners, a Leachate Treatment facility, an Environmental Monitoring System, Gas Extraction, …	2010
	Landfill	https://borneobulletin.com.bn/educational-trip-sungai-paku-engineered-landfill/	SPEL covers a total area of 110 hectares where 16 hectares are allocated for the disposal site. The remaining ones are for the SPEL’s facilities such as the Leachate Treatment Plant (LTP), the Septic Sludge and Restaurant Grease Treatment System (SSRGTS) and the Crush and Demolition (C&D) Facility. The design of SPEL was to last 15-20 years with an operating capacity of 500 tonnes of solid wastes…
	Landfill	https://waste-management-world.com/artikel/engineering-a-nation-s-waste-management/	The rehabilitation project – started in December 2008 and being carried out by local engineering and project management company Jurusy Perunding – is said to be going to plan, with the site split into two for development. Site A has been completed, with the waste having been covered by grass and a natural habitat. Site B remains a live landfill until a new ‘engineered landfill’ at Sungai Paku com…
			The BEDB says the new Sungai Paku landfill will be constructed to the toughest U.S. EPA standards, and will cover an area of some 110 hectares including access roads. A 200m wide buffer zone will be planted with trees to minimise the environmental impact of the site, and double layer heavy duty liners are to be used. In addition, a daily cover of 150mm of inert material will be applied to reduce …
	Waste composition	https://apec-flows.ntu.edu.tw/news-detail.aspx?seq=67	The top four compositions of municipal solid waste disposed at the Sungai Paku Engineered Landfill are: 32 per cent food waste; 29 per cent plastic; 11 per cent green; and 10 per cent paper.	2021

## Sheet: Reference
Ref. No	Reference
1	Ministry of Development, Brunei (2006). Solid Waste management in Negara Brunei Darussalam.
2	Ministry of Development, Brunei Darussalam (2022). Waste collection services. Available online: http://www.env.gov.bn/SitePages/Waste%20Collection%20Services.aspx
3	Borneo Bulletin (2022). Over 50 littering violations in the first half of 2022. Available online: https://borneobulletin.com.bn/over-50-littering-violations-in-the-first-half-of-2022/
4	UNEP (2017). Waste Management in ASEAN countries: Summary Report. Available online: https://www.unep.org/resources/report/waste-management-asean-countries-summary-report
5	Ministry of Health (2019). Guideline on Healthcare Waste Management. Available online: https://www.moh.gov.bn/Downloadables/Guideline%20on%20Health%20Care%20Waste%20Management.pdf
6	R.K.S. SYED Mohammed Enterprise (2023). Waste collection service. Available online: https://rksbrunei.com/public/about
7	Ministry of Development (2023). E-waste service. Available online: http://www.env.gov.bn/SitePages/e-Waste%20Services.aspx
8	Ministry of Development (2023). Status of Hazardous Waste Management in Brunei Darussalam. Available online: http://www.env.gov.bn/SitePages/Status%20Of%20Hazardous%20Waste%20Management%20In%20Brunei%20Darussalam.aspx
9	Ministry of Development, Brunei (2006). Recycle 123 Handbook.
10	ENVIRO IDAMAN SDN. BHD. 2023. Transfer station and landfill. Available online: https://mavrosempire.wixsite.com/enviroidaman
11	Singapore Business Review (2013). Sungai Paku waste treatment facility. Available online: https://sbr.com.sg/building-engineering/news/st-engineering-secures-665mln-project-in-brunei
12	Xinhuanet News (2023). Brunei plans to build waste to electricity incinerator plant. Available online: https://english.news.cn/asiapacific/20230320/820a0cc08b2245bdb232da6f5c04ef1b/c.html
13	Ministry of Finance and Economy (2020). Voluntary National Review Report of Brunei Darussalam.
14	Fourth Regional 3R Forum in Asia (2013). Country Analysis Paper for Brunei Darussalam.
15	Shams, S., Guo, Z. (2014). Intregrated and Sustainable Solid Waste Management for Brunei Darussalam.
16	Daikyo Environmental Recycling Sdn Bhd (2023). Company information. Available online: https://daikyogas.com/about-us/
17	ASEAN (2021). ASEAN adopts framework for Circular Economy.
18	Zaman, A., Swapan, M. Performance evaluation and benchmarking of global waste management systems, Resources, Conservation and Recycling, Volume 114, 2016, Pages 32-41, ISSN 0921-3449, https://doi.org/10.1016/j.resconrec.2016.06.020.

## Sheet: Waste collection com
Business No.	Waste source			Type of waste collected
	Industrial	Commercial	Residential	Domestic Waste (general waste)	Bulky Waste (HHs furniture)	Construction Waste	Green Waste	E-waste
1	x	x	x	x
2	x	x	x	x
3	x	x	x	x
4	x	x	x	x
5	x	x	x	x
6	x	x	x	x
7	x	x		x
8	x	x		x
9	x	x		x
10	x	x	x	x	x	x
11	x	x	x	x
12		x		x
13	x	x		x
14	x	x		x
15		x		x
16	x	x		x
17	x	x		x
18		x			x	x	x
19			x	x	x	x	x
20			x		x	x	x
21	x	x	x		x	x	x
22			x		x	x	x
23			x		x	x	x
24			x	x	x	x	x
25	x	x	x	x	x	x	x
26	x	x	x	x	x	x	x
Source: http://www.env.gov.bn/Shared%20Documents/SENARAI%20SYARIKAT%20BERDAFTAR%20DI%20BAWAH%20JASTRE%2022oct2022%20-%20WEBSITE%20updated.pdf
Accessed: July, 2023

## Sheet: Recycling Com.
Business no.	Waste accepted
1	Used tyres, waste oil, flammable liquids, drilling chemicals, medical wastes, laboratory waste, fluorescent tubes, pyrotechniques, industrial wastewaters, contaminated soils / rags
2	Metal, Steel, Aluminium, Copper, Brass, Battery
3	Scrap Metals, Iron, Copper, Brass, Steel, Alloy Tin, Aluminium, Waste Oil, Waste Chemical Sludge
4	Metal (Iron, Steel, Alloy tin, Copper, Brass), Aluminium, Car Battery, E-Waste
5	Metal (Iron, Steel, Copper), Aluminium
6	White Paper
7	Used Cooking Oil
8	Metal (Iron, copper, brass), aluminium can, car battery
9	Kertas, Metal (Iron, copper, brass), Nylon bags, E-Waste
10	Metal (Iron, copper, brass), Aluminium
11	Metal (Steel, Copper), Aluminium
12	Kertas (Old Corrugated Cardboard, mix paper), Plastik (HDPE / PET)
13	Kertas (Newspaper, cardboxes, magazines), Aluminium Cans
14	Waste Oil, Waste Chemical, Sludge
15	Green Waste (timber, branches, leaves)
16	Metal (Iron, Steel, Alloy tin, Copper, Brass), Aluminium, Car Battery
17	Metal (Iron, Steel, Alloy tin, Copper, Brass), Aluminium
18	Metal (Iron, Steel, Alloy tin, Copper, Brass), Aluminium, Car Battery
19	Metal (Iron, Steel, Alloy tin, Copper, Brass), Aluminium, Car Battery
20	Metal (Iron, Steel, Alloy tin, Copper, Brass), Aluminium, Car Battery
