# Supplementary material
Source: MDPI journal article supplement (https://www.mdpi.com/2813-0391/2/1/6)
Supplement: s1 [file s1 › WMS-DSC_Tool_2023_Hanoi.xlsx]

## Sheet: Results Overview
Overview of the results for the assessment of City, Country regarding								Overview of the results for the assessment of City, Country regarding
Governance, Sector and Market								Collection and Transport, Waste Disposal, Energy Recovery, Waste Recycling, Prevention and Reuse
		Stage 1	Stage 2	Stage 3	Stage 4	Stage 5				Stage 1	Stage 2	Stage 3	Stage 4	Stage 5
Governance	G.1 Duties and targets							Collection and transport	CT.1 Waste collection
	G.2 Laws, Regulations and Agreements								CT.2 Service provider
	G.3 Nomenclature								CT.3 Collection rates
	G.4 National level WM								CT.4 Separate collection
	G.5 Regional level WM								CT.5 Collection of recyclables
	G.6 Municipal level WM								CT.6 Waste transport
	G.7 Stakeholder cooperation								CT.7 Transfer stations
	G.8 Control mechanisms								CT.8 Collection of hazardous wastes
	G.9 Authorization and public participation							Waste disposal	WD.1 Waste disposal
	G.10 Quality standards and threshold values								WD.2 Operational measures
	G.11 Data collection, reporting and evaluation								WD.3 Leachate water management
	G.12 Education								WD.4 Landfill gas management
	G.13 Research								WD.5 Other means of disposal
	G.14 Awareness building							Energy recovery	ER.1 Thermal disposal and energy recovery
	G.15 Occupational health and safety								ER.2 Incineration plants
	G.16 Environmental protection								ER.3 Energy and raw material recovery
Sector and Market	SM.1 Sector development							Waste recycling	WR.1 Waste recycling
	SM.2 Jobs								WR.2 Composting
	SM.3 Informal sector								WR.3 Fermentation
	SM.4 WM system structure and organization								WR.4 Sorting and recycling plants
	SM.5 Financial funding								WR.5 Refuse derived fuel
	SM.6 Enterprises								WR.6 Recycling of construction and demolition waste
	SM.7 Recycling market								WR.7 Recycling rates
									WR.8 Diversion rate and Circular material use rate
m	Subcomponent is met							Prevention and reuse	PR.1 Prevention
pm	Subcomponent is partly met								PR.2 Circular business and usage models
	Subcomponent is not met or data is not available								PR.3 Product design
									PR.4 Process optimization and operational disposal strategies
									PR.5 Waste generation
									PR.6 Zero-waste index
								m	Subcomponent is met
								pm	Subcomponent is partly met
									Subcomponent is not met or data is not available

## Sheet: Collection and Transport
	Stage 1		Stage 2		Stage 3		Stage 4		Stage 5		Rationale / Source
Collection and transport (CT.1 - CT.8)
CT.1	CT.1.1.1 Lack of systematic collection; limited collection	nm	CT.1.2.1 Collection is systematic, but inefficient	m	CT.1.3.1 Efficient collection through optimizing measures and concepts	pm	CT.1.4.1 Underground systems in public spaces	nm	CT.1.5.1 Waste bins have no negative effect on landscape	nm	CT.1.2.1 + CT.1.2.2 + CT.1.2.3 + CT1.2.4 --> m; CT.1.3.1 + CT1.3.2 + CT.1.3.3 --> pm: There is a uniform waste collection system and the colection points are within 200m distance between different area throughout the cities. However, littering problem is still existing in different spots. Waste collection and transport in Hanoi, particularly the urban areas, ir organized by public and private san…
	CT.1.1.2 Lack of uniform collection bins	nm	CT.1.2.2 Use of uniform aboveground systems	m	CT.1.3.2 Use of new bin systems (e.g. waste locks)	pm	CT.1.4.2 Waste bins with fill level sensors	nm	CT.1.5.2 Avoid of container overfilling (smart bins)	nm
			CT.1.2.3 Collection points are within 200m distance	m	CT.1.3.3 Service provision of cleaning up bins	pm	CT.1.4.3 Introduction of digitalization measures	nm	CT.1.5.3 Smart waste container separation	nm
	CT.1.1.3 Missing of basic principles of urban hygiene, major littering exists	nm	CT.1.2.4 Urban hygiene principles are partially met, but littering in public spaces remains a problem	m					CT.1.5.4 Full maintainance of urban hygiene principles and no littering in public spaces	nm
CT.2	CT.2.1.1 Collection mostly by waste pickers	nm	CT.2.2.1 Collection mostly by formal sector	pm	CT.2.3.1 Collection mostly by formal or organized informal sector	pm			CT.2.5.1 Waste collection exclusively by formal sector	nm	CT.2.2.1 + CT.2.3.1 --> pm: In Hanoi there is an important informal sector including scrap collectors, scrap purchase stores and recycling facilities in and outside the city, actively involved in sorting and collecting solid waste. Every day, a large number of scrap collectors travel around the city to collect plastics, rubbers, glass, papers, magazines or bottles from households, offices, produc…
CT.3	CT.3.1.1 Collection rate (CR): urban ≤ 50% OR no data	nm	CT.3.2.1 CR: urban > 50 and ≤ 70%	nm	CT.3.3.1 CR: urban > 70 and ≤ 80%	nm	CT.3.4.1 CR: urban > 80 and ≤ 95%	nm	CT.3.5.1 CR: urban > 95% and ≤ 100%	m	CT.3.5.1 --> m: According to the National Environment Report 2011-2015, the rate of household solid waste collection in urban areas reached an average of 84-85%. This rate is rising in accordance with the grade of cities. The lowest rate is at cities under grade IV with an average collection rate of 65%, and the highest one belongs to Hanoi city (special city) with 98% [2].
	rural ≤ 30% OR no data	nm	rural > 30 and ≤ 50%	pm	rural > 50 and ≤ 80%	pm	rural > 80 and ≤ 95%	nm	rural > 95% and ≤ 100%	nm	CT.3.2.1 + CT.3.3.1--> pm: In rural areas, the collection rate is 40-55% varying by localities, in small towns it could reach 60-80% while in remote mountainous area it is even below 10%. In rural area, the household solid waste is usually collected by an environmental sanitation team for each hamlet. In some localities, private companies also participate in collecting and treating solid waste (T…
CT.4	CT.4.1.1 Collective collection of residual waste	m	CT.4.2.1 First forms of separation at source collection (2 fractions)	m	CT.4.3.1 Mandatory waste collection for households and businesses (>3 fractions)	pm	CT.4.4.1 Reduction of illegal collection (e.g. electronics)	nm	CT.4.5.1 All recyclables are collected separately	nm	CT.4.1.1 + CT4.1.2 + CT4.2.1 + CT.4.2.2 + CT.4.2.3 --> m; CT.4.3.1 + CT.4.3.2 +CT.4.3.4 --> pm: According to Environmental Protection Law, the waste generators are responsible for sorting waste at source in order to facilitate its re-use, recycling, energy recovery and disposal. In fact, in Vietnam only industrial and medical wastes are required to be separated at source into two categories (ordi…
	CT.4.1.2 Recyclables solely collected by waste pickers	m	CT.4.2.2 Recyclables collected by (in)formal sector	m	CT.4.3.2 Set up of recycling centers	pm
					CT.4.3.3 Rate of incorrect sorting > 30%	na	CT.4.4.2 Rate of incorrect sorting > 10 to ≤ 30%	nm	CT.4.5.2 Rate of incorrect sorting ≤ 10%	nm
			CT.4.2.3 Separate collection of hospital waste	m	CT.4.3.4 Separate collection of: electrical, construction, demolition, agricultural and forestry waste	pm
CT.5	CT.5.1.1 CR are missing, only estimations are available or data is not publicly available	m	CT.5.2.1 Recyclables CR:		CT.5.3.1 Recyclables CR:		CT.5.4.1 Recyclables CR:		CT.5.5.1 Recyclables CR:		CT.5.1.1 --> m: There is no further information on recycable materials collection rates both for Hanoi and through out the country.
			Metals: ≤ 50%	na	Metals: > 50 and ≤ 70%	na	Metals: > 70 and ≤ 90%	na	Metals: > 90%	na
			Paper: ≤ 30%	na	Paper: > 30 and ≤ 70%	na	Paper: > 70 and ≤ 90%	na	Paper: > 90%	na
			Glass: ≤ 30%	na	Glass: > 30 and ≤ 70%	na	Glass: > 70 and ≤ 90%	na	Glass: > 90%	na
			Organics: ≤ 30%	na	Organics: > 30 and ≤ 70%	na	Organics: > 70 and ≤ 90%	na	Organics: > 90%	na
			Plastics : ≤ 10%	na	Plastics: > 10 and ≤ 50%	na	Plastics: > 50 and ≤ 90%	na	Plastics: >90%	na
			Textiles: ≤ 10%	na	Textiles: > 10 and ≤ 50%	na	Textiles: > 50 and ≤ 90%	na	Textiles: >90%	na
CT.6	CT.6.1.1 Formal: Only use of simple vehicles	pm	CT.6.2.1 Formal: Mostly use of large fleets and automation	pm	CT.6.3.1 Formal: Waste firms improve vehicle fleets (incl. compactors, lifters).	pm	CT.6.4.1 Use vehicles depending on waste type	na	CT.6.5.1 Higly engineered and fully automated vehicles	nm	CT. 6.1.1 + CT6.1.2 + CT.6.2.1 + CT.6.2.2 + CT.6.3.1 + CT.6.3.2 --> pm: small- or medium-sized compaction trucks are used for formal sectors, carts and small size vehicles are still commonly use for informal sector especially where there is a limited space such as. [1;3]
	CT.6.1.2 Informal: Only use of pack animals, handcarts, etc.	pm	CT.6.2.2 Informal: Mostly use of small or modified vehicles	pm	CT.6.3.2 Informal: Mostly use of modernized small trucks	pm	See WM 3.4.1
CT.7	CT.7.1.1 Direct transport of waste to landfills or dumps	pm	CT.7.2.1 Introduction of transfer stations (TS)	m	CT.7.3.1 TS increase collection efficiency	pm			CT.7.5.1 All existing TS are state of the art	nm	CT.7.1.1 + CT.7.1.2 --> pm; Currently, Hanoi city lacks temporary waste gathering points in urban areas and has no large-scale waste transfer station in the suburbs to load waste from small garbage trucks to bigger and long-distance vehicles. In urban areas, especially in the center of city, the population and building density are very high. Thus, there is less spare place for building temporary …
	CT.7.1.2 Roads used as transfer areas for waste	pm	CT.7.2.2 Simple TS are unrestricted accessible to public	pm	CT.7.3.2 Advanced TS with restricted access to public.	pm
CT.8	CT.8.1.1 Lack of separate collection of hazardous waste (HW) from households	nm	CT.8.2.1 Small HW quantities from households are collected separatly	pm	CT.8.3.1 Disposal of small quantities of HW is free of charge	pm	CT.8.4.1 Full collection of HW flows	nm	CT.8.5.1 HW quantities are reduced to a minimum	nm	CT8.2.1 + CT.8.3.1 + CT.8.3.2 --> pm: Industrial waste is sorted at source into ordinary waste and hazardous waste for separate collection and treatment; some hazardous waste from household such as e-waste, batteries are partly collect separately through a recycling program such as Vietnam recycle [1;4]
	CT.8.1.2 Lack of separate collection of industrial HW	nm			CT.8.3.2 Industrial HW is collected almost separately	pm
m	fully met
pm	partially met
nm	not met
na	not available

## Sheet: Waste Disposal
	Stage 1		Stage 2		Stage 3		Stage 4		Stage 5		Rationale / Source
Waste disposal (WD.1 - WD.5)
WD.1	WD.1.1.1 Lack of targeted and centralized waste disposal	nm	WD.1.2.1 Targeted and centralized waste disposal in minimum controlled landfills	m	WD.1.3.1 Introduction of landfill classes	nm	WD.1.4.1 Mineral waste is predominantly landfilled	na	WD.1.5.1 Waste landfilling gets less important	nm	WD.1.2.1 + WD.1.2.2+ --> m; WD1.3.2 + WD.1.2.3 + WD.1.3.4 --> pm; According to MOC data in 2015, there are around 660 landfills (excluding small landfills at commune level) with total area of 4,900ha, of which 203 landfills are sanitary (~31% of landfills). Of these 660 landfills, 5.7% are over 20ha; 59.3% are between 1-20ha and; 35% are below 1ha. Some big landfills include Nam Son (Hanoi) – 83.…
	WD.1.1.2 Disposal in open dumps, uncontrolled landfills, roads etc.	nm	WD.1.2.2 Open burning and dumping is illegal, but still practiced	m	WD.1.3.2 Non-hazardous and hazardous waste are no longer disposed together	pm	WD.1.4.2 Recyclables are rarely landfilled	nm	WD.1.5.2 Small quantities of waste are landfilled	nm
	WD.1.1.3 Open burning for eliminiation and energy recovery	nm			WD.1.3.3 Liquid waste is no longer disposed in landfills	nm	WD.1.4.3 After-use of landfills gets more relevant	nm	WD.1.5.3 Reuse of closed landfill areas for other purposes	nm
					WD.1.3.4 Conversion of (in)active landfills to sanitary standard.	pm	WD.1.4.4 Waste is disposed exclusively on sanitary landfills	nm	WD.1.5.4 Importance of rehabilitation of old landfills	nm
							WD.1.4.5 Safe disposal of disaster waste on approved sites	nm	WD.1.5.5 Full avoidance of illegal dumping	nm
	WD.1.1.4 Open dump and controlled dump predominate	pm	WD.1.2.3 Controlled or engineered landfill predominate	pm			WD.1.4.6 Sanitary landfill predominates	nm	WD.1.5.6 All (in)active landfills have sanitary landfill standard	nm
WD.2	WD.2.1.1 Lack of disposal controls (waste registration)	pm	WD.2.2.1 Registration of waste type, etc. before disposal	pm	WD.2.3.1 Registration and compaction of waste are the norm	pm			WD.2.5.1 All existing and new landfills comply with the current state of art	nm	WD.2.1.1 + WD.2.1.2 + WD.2.1.3 + WD.2.2.1 + WD.2.2.2 + WD.2.2.3 + WD.2.3.4 + WD.2.2.5 + WD.2.3.1 + WD.2.3.3 --> pm; as there is a mixtured between controlled landfill and sanitary landfills, the operation measures are varied depends on the type of landfills. [2]
	WD.2.1.2. Waste is burned on dumping sites	pm	WD.2.2.2 Waste burning on landfill sites is missing	pm	WD.2.3.2 Systematic pre-treatment of waste is mandatory	nm
	WD.2.1.3 Landfill access controls are lacking or inadequate	pm	WD.2.2.3 Compaction and daily cover of waste	pm	WD.2.3.3 Systematic landfill management is carried out	pm
			WD.2.2.4 Site drawing showing landfill boundary and filling area in place	pm	WD.2.3.4 Realization of measures for (post-)closure management	na
	WD.2.1.4 Dumping sites are not staffed or only in short times for site checking	nm	WD.2.2.5 Site is staffed during operational hours	pm
WD.3	WD.3.1.1 Leachate infiltrates soil or evaporates	pm	WD.3.2.1 Available leachate collection	pm	WD.3.3.1 Leachate collection and treatment in all active landfills	nm	WD.3.4.1 Compliance of strict limits at water monitoring	na	WD.3.5.1 Decrease of leachate and toxicity	nm	WD.3.1.1 + WD.3.1.2 + WD.3.2.1 + WD.3.2.2 + WD.3.2.3 --> pm: In large-scale facilities such as Nam Son Complex, Xuan Son and Kieu Ky centers, sanitary landfill processing is applied for waste disposal. Leachates generated from landfills are collected and treated. In other landfills, leachates are not handled or simply handled through natural lagoon that doesn’t meet environmental requirements and…
	WD.3.1.2 Lack of surface and groundwaster monitoring	pm	WD.3.2.2 Recirculation of leachate in the landfill body	pm						nm
			WD.3.2.3 Surface and groundwater is monitored	pm						nm
WD.4	WD.4.1.1 Landfill gas is released into the atmosphere	pm	WD.4.2.1 Implementation of passive collection or flaring of landfill gas	pm	WD.4.3.1 Landfill gas collection for energy recovery and gas monitoring	nm	WD.4.4.1 Compliance of strict limits for gas monitoring	na	WD.4.5.1 Controlled flaring of landfill gas only in emergencies and when it is unprofitable (small gas quantities)	nm
WD.5	WD.5.1.1 Waste burning or dumping on high seas and coastal waters	pm			WD.5.3.1 Waste burning or dumping on high seas and coastal waters is prohibited, but still takes place	pm			WD.5.5.1 Avoidance of waste burning or dumping on high seas and coastal waters	nm	WD.5.1.1 + WD.5.3.1 --> pm: Viet Nam has more than 3,000 islands. Excluding these islands, the country has a coastline of 3,444 km, extending through the territories of 24 provinces and cities, which include 127 urban and rural districts, 21 towns and six cities (Ha Long, Vinh, Hue, Quy Nhon, Nha Trang, Vung Tau). Viet Nam is the fourth largest contributor to marine plastic pollution globally, ac…
m	fully met
pm	partially met
nm	not met
na	not available

## Sheet: Energy Recovery
	Stage 1		Stage 2		Stage 3		Stage 4		Stage 5		Rationale / Source
Energy Recovery (ER.1 - ER.3)
ER.1	ER.1.1.1 Controlled energy recovery or thermal disposal is missing	pm	Availability of organizational criteria:		ER.1.3.1 ER is used to treat large waste quantities of the city inside or outside the country	pm	ER.1.4.1 ER is essential treatment alternative	na	ER.1.5.1 Incinerated waste amount decreases due to higher recycling rates	na	ER.1.1.1 + ER.1.2.1 + ER1.3.1 + ER.1.3.3 --> pm: In Hanoi, there are three incinerators with a treatment capacity of less than 1,000 tons/day. They are all operated by private companies (Thanh Cong Cooperatice, Thang Long Urban Environment JSC and Thanh Quang Investment JSC). These incinerators, with mostly Chinese technologies, were manufactured in Vietnam or China with some technical improvemen…
			I) controlled landfills	pm	ER.1.3.2 Agreements regulate waste delivery, energy sales and pricing	na
			II) qualified staff	pm	ER.1.3.3 At least 150.000 tons/y of suitable waste are available for incineration	pm	ER.1.4.2 Lower heating value has to be at least 11 MJ/kg	na
			III) systematic collection	pm
			IV) Sorting at source is implemented	pm
			V) Basic WM laws and rules are developed	pm
			VI) Incineration plants are positioned in political plans	pm
			VII) Political and social will is given	pm
			VIII) Total costs for the plant are secured	pm
			IX) Public or private actors are experienced in managing incineration plants efficiently	pm
			X) Spare parts can be purchased locally or imported	na
			Availibility of technical criteria:
			I) stable supply of combustible waste	m
			II) lower heating value at least 7 MJ/kg	na
			III) Bottom and fly ash can be treated safely	na
	ER.1.1.2 Co-incineration of waste is missing	pm	ER.1.2.3 Co-incineration of specific waste or RDFs in industrial firing plants	pm	ER.1.3.4 ER as alternative for landfilling; energy-intensive industries often make use of it	na
ER.2	ER.2.1.1 Waste incinerators are neither operating or planned in the country	nm	ER.2.2.1 Incineration plants (incl. flue gas cleaning - FGC) are in planning or construction in the country or simple incineration plants without FGC are in operation with engineered process controls (incl. continous monitoring and recording of operating parameters)	pm	ER.2.3.1 Operation of waste incinerators with FGC	na	ER.2.4.1 High-tech and state of the art processes ensure reliability and safe emission elimination	na	ER.2.5.1 Automatic and homogenous waste input	na	ER.2.2.1 +ER.3.1.1 --> pm; ER3.2.1 + ER3.2.2 --> m: On July 25, the Soc Son waste-to-energy plant, located at the Nam Son Waste Treatment Complex in Hanoi, was connected to the national grid and becomes the largest one in the country, with a capacity of handling 4,000 tons of dry solid waste per day. The new facility can treat 6,500-7,000 tons of waste in Hanoi and produce 75MW of electricity per…
					I) Continuous monitoring of operating parameters and emissions	na	ER.2.4.2 Flue gas controls compliant with applicable environmental standards	na
					II) Monitoring systems are routinely calibrated	na
					III) Maintenance plans or schedules are in place	na
					IV) Evidence that equipment is well maintained	na
					V) Fire extinguishers available on site	na
ER.3	ER.3.1.1 Raw material and ER through controlled waste incineration is missing	pm	ER.3.2.1 Possible recovery of energy through waste incineration	m	ER.3.3.1 Selling of recovered energy (electrical, thermal, combination)	pm			ER.3.5.1 Increased replacing of primary energy resources	na
					ER.3.3.2 Incineration or RDF plants are located in areas with moderate heat demand and good transport and energy infrastructure exists	na
			ER.3.2.2 Recycling of incineration residues is missing	pm	ER.3.3.3 Recovered metals from incineration process are sold; other by-products are treated safely, but recycled rarely	na	ER.3.4.1 Increased recycling and reuse of slags	na	ER.3.5.2 Almost complete reintroduction of by-products from incineration into the economic cycle	na
m	fully met
pm	partially met
nm	not met
na	not available

## Sheet: Waste Recycling
	Stage 1		Stage 2		Stage 3		Stage 4		Stage 5		Rationale / Source
Waste recycling (WR.1 - WR.8)
WR.1	WR.1.1.1 Material recycling is rarely done, but open-loop recycling and downcycling predominate	pm			WR.1.3.1 Extension of waste treatment by mechanical, biological, etc. treatment options	pm	WR.1.4.1 (Semi-)closed-loop recycling and upcycling increase	nm	WR.1.5.1 (Semi-)closed-loop recycling dominates	nm	WR.1.1.1 + WR.1.1.2 + WR.1.3.1 + WR.1.3.2 --> pm:
							WR.1.4.2 Dialogues between manufactures and recyclers take place to identify and solve recycling problems	nm	WR.1.5.2 Implementation of circular bioeconomy	nm
	WR.1.1.2 Ensured input for recycling plants is lacking	pm			WR.1.3.2 Input for recycling plants is partly ensured	pm	WR.1.4.3 Input for recycling plants is fully ensured	nm
WR.2	WR.2.1.1 Organic waste is landfilled or is composted at home or used as animal food	m	WR.2.2.1 Recycling of organics in simple or open composting plants or with mobile aggregates	m	WR.2.3.1 Introduction of static, closed composting in tunnels / containers with sorting technologies	m	WR.2.4.1 Integration of (quasi-) dynamic processes in existing plants	na	WR.2.5.1 Microplastics is removed from compost	nm	WR.2.1.1 + WR.2.2.1 + WR.2.3.1 --> m; WR.2.2.2 + WR.2.3.2 --> pm; Composting is often used in Vietnam for waste treatment. In Hanoi, there are two compost/organic humus production plants: one in Cau Dien waste disposal center, the other in Kieu Ky treatment site. Due to lack of financial supports, the plant can only produce less than 13.000 tons/years, though the plant capacity can process upto 5…
			WR.2.2.2 Compost has low compost quality	pm	WR.2.3.2 Increased use of compost in agriculture & landscape management	pm	WR.2.4.2 High quality compost, which still contains microplastic	nm	WR.2.5.2 Very high quality and purity level of compost	nm
							WR.2.4.3 Increased use of compost in the private sector	na
WR.3	WR.3.1.1 No planned or operation fermentation plants	nm	WR.3.2.1 Planning or construction of fermentation plants	pm	WR.3.3.1 Fermentation plants recycle organics	pm			WR.3.5.1 Biogas plants are an essential component of CE	nm	WR.3.2.1 + WR.3.3.1 + WR.3.3.2 --> pm; According to Vietnam Energy efficiency program, in 2012 there were about 500,000 biogas tank nationwide, mainly rural area with the volume below 10m3, which mainly treated animal husbandry in bigoas tank to produce the animal feed and fertilizer for cultivation.
					WR.3.3.2 Separation of impurities for energetical use of biogas (e.g. in combined heat and power plants)	pm	WR.3.4.1 Introduction of CO2-separation stage at plants	nm
							WR.3.4.2 Feeding of biomethan into the natural gas grid	nm
					WR.3.3.3 Fermentation residues are used as fertilizers	na	WR.3.4.3 Very high quality of digestates	nm	WR.3.5.2 Mostly full removal of microplastics from digestates	nm
WR.4	WR.4.1.1 Manual sorting of recyclables	m	WR.4.2.1 Partially automated sorting of recyclables (incl. shredding and separation units)	m	WR.4.3.1 Increase of sorting efficiencies through mechanical separation, screening aggregates	pm	WR.4.4.1 Generation of high-quality fractions through modern sorting facilities	nm	WR.4.5.1 Increasingly digitalized recycling technologies	nm	WR.4.1.1 + WR.4.1.2 + WR.4.2.1 --> m; WR.4.3.1 --> pm: Recycling activities in craft villages, however, are informal with backward technologies and usually cause major pollution which impacts the environment and public health. Serious impacts have been observed in paper, metal, plastics and electronicwaste recycling villages in Hung Yen, Bac Ninh, and Hai Duong provinces. Recycling activities are…
	WR.4.1.2 Inefficient recovery of valuable materials from electronic waste	m	WR.4.2.2 Recovery of metals and RDFs in mechanical-biological plants	nm	WR.4.3.2 Generation of high quality mono-fractions	na			WR.4.5.2 Increasing use of digitalization measures to rise recyclability of products	nm
					WR.4.3.3 Use of stabilate processes to separate metals and RDFs	nm	WR.4.4.2 Production of methanol or synthesis gas from raw material plastic recycling	nm
									WR.4.5.3 Safe recycling of waste containing harmful substances	nm
WR.5	WR.5.1.1 Lack of RDFs recovery from waste	pm	WR.5.2.1 Start of RDF recovery from waste treatment plants	nm	WR.5.3.1 Increasing recovery of RDFs from waste	na			WR.5.5.1 RDF is decreasing due higher closed loop recycling	nm	WR.5.1.1 --> pm: RDFs technology is still new for Vietnam
WR.6	WR.6.1.1 Only conventional demolition of buildings	pm	WR.6.2.1 Mostly conventional demolition of buildings	pm	WR.6.3.1 Semi-selective demolition occurs predominantly	na	WR.6.4.1 Predomination of selective demolition	nm	WR.6.5.1 Only selective demolition occurs	nm	WR.6.1.1 + WR. 6.1.2 + WR.6.2.1 + WR.6.2.2 + WR.6.2.3 + WR.6.3.2 --> pm; WR.6.1.3 --> m: Hanoi generated about 1000-1500 tons/day which about 70% is collected. The CDW in Vietnam is mainly used for landfill and bricks (Nguyen et al. 2019) and very limited use for recycling. municipal solid waste and CDW are now sometimes mixed together thus it makes it difficult to sort and manage. Furthermore, s…
	WR.6.1.2 Depollution is done rarely	pm	WR.6.2.2 More frequent de-pollution	pm			WR.6.4.2 Depollution is usual practice in demolition	nm
	WR.6.1.3 C&D waste disposal on landfills/dumps predominates	m	WR.6.2.3 Rare use of C&D material as filler or surface excavations	pm	WR.6.3.2 Increased use of C&D materials as filler or for landfill construction	pm	WR.6.4.3 Increased high quality recycled construction material	na	WR.6.5.2 Almost complete recycling of C&D waste, little is landfilled	nm
					WR.6.3.3 Emerging of recycling routes for C&D materials (road construction)	na	WR.6.4.4 Thermal treatment or landfilling of non-recyclable construction materials	na	WR.6.5.3 Prohibition of non-recyclable materials for construction	nm
							WR.6.4.5 Use of robotics for efficient sorting	na
WR.7	WR.7.1.1 Precise recycling rate numbers are missing	m	WR.7.2.1 Recycling rates:		WR.7.3.1 Recycling rates:		WR.7.4.1 Recycling rates:		WR.7.5.1 Recycling rates:		WR.7.1.1 --> m: There is still no official, consistent and scientifically based data regarding the recycling rate of any kind of waste at national level published by the government in Viet Nam [2]. Others source such as wordbank, mentioned plastic recycling rate between 10-20%. However,due to the missing information of others waste stream, it is assigned to stage 1.
			Metals: ≤ 40 %	na	Metals: > 40 and ≤ 70 %	na	Metals: > 70 and ≤ 90 %	na	Metals: > 90 %	na
			Paper: ≤ 40 %	na	Paper: > 40 and ≤ 70 %	na	Paper: > 70 and ≤ 90 %	na	Paper: > 90 %	na
			Glass: ≤ 40 %	na	Glass: > 40 and ≤ 70 %	na	Glass: > 70 and ≤ 90 %	na	Glass: > 90 %	na
			Composites: ≤ 20 %	na	Composites: > 20 and ≤ 60 %	na	Composites: > 60 and ≤ 90 %	na	Composites: > 90 %	na
			Plastics: ≤ 20 %	na	Plastics: > 20 and ≤ 60 %	na	Plastics: > 60 and ≤ 90 %	na	Plastics: > 90 %	na
			WR.7.2.2 Recycling rates:		WR.7.3.2 Recycling rates:		WR.7.4.2 Recycling rates:		WR.7.5.2 Recycling rates:
			E-Waste: > 10 and ≤ 40 %	na	E-Waste: > 40 and ≤ 70 %	na	E-Waste: > 70 and ≤ 90 %	na	E-Waste: > 90 %	na
			C&D waste: > 10 and ≤ 40 %	na	C&D waste: > 40 and ≤ 70 %	na	C&D waste: > 70 and ≤ 90 %	na	C&D waste: > 90 %	na
WR.8	WR.8.1.1 CMUR: ≤ 1 % OR no data	m	WR.8.2.1 CMUR: > 1 % ≤ 10 %	na	WR.8.3.1 CMUR: > 10 % ≤ 30 %	na	WR.8.4.1 CMUR: > 30 % ≤ 70 %	na	WR.8.5.1 CMUR: > 70 %	na	No information available
	WR.8.1.2 DR: ≤ 0,1 OR no data	m	WR.8.2.2 DR: > 0,1 ≤ 0,2	na	WR.8.3.2 DR: > 0,2 ≤ 0,4	na	WR.8.4.2 DR: > 0,4 ≤ 0,7	na	WR.8.5.2 DR: > 0,7 ≤ 1,0	na
m	fully met
pm	partially met
nm	not met
na	not available

## Sheet: Prevention and Reuse
	Stage 1		Stage 2		Stage 3		Stage 4		Stage 5		Rationale / Source
Prevention and reuse (PR.1 - PR.6)
PR.1	PR.1.1.1 Prevention is motivated by poverty	pm	PR.1.2.1 Prevention is motivated by lack of resources	pm					PR.1.5.1 Decoupling of GDP and waste generation	nm	PR.1.1.1 + PR.1.2.1 + PR.1.3.1 + PR.1.3.3 + PR. 1.4.1 --> pm: It is observed that waste reuse and recycling, including energy recovery, and waste treatment have been defined quite clearly by the Decree 38/2015/ND-CP. Waste prevention and reduction, however, have not been addressed and defined in the current environmental legislations of the country [2]. Waste prevention and reduction have not bee…
					PR.1.3.1 Higher political priority for food waste issues	pm	PR.1.4.1 Formulation of food waste avoidance targets and implementation of measures	pm	PR.1.5.2 Food waste is reduced to a minimum	nm
					PR.1.3.2 Few disposables are banned or permitted exceptionnally	nm	PR.1.4.2 All disposables are banned or permitted exceptionnally	nm	PR.1.5.3 CE reduces negative impacts of materials and products by avoiding resources or waste	nm
							PR.1.4.3 Prohibited destruction of unsold durable goods	nm	PR.1.5.4 Increase of bans for substances and products	nm
					PR.1.3.3 Emerging initiatives to educate the population regarding closing-loops	pm			PR.1.5.5 CE provides long use of raw materials in the cycle	nm
							PR.1.4.4 Ensured lifetime-extension of buildings before construction	nm	PR.1.5.6 Full deconstruction of buildings is ensured before their realization	nm
									PR.1.5.7 Consumption decisions based on waste prevention	nm
PR.2	PR.2.1.1 Lack of circular business and usage models	pm	PR.2.2.1 Spare parts of End-of-life (EoL) products are used for repair	pm	PR.2.3.1 Increased use of EoL spare parts	na			PR.2.5.1 Permanent provision of spare parts through digitalization	nm	PR.2.2.1 + Pr.2.2.2 + PR.2.3.2 + PR.2.3.3 + PR.2.3.4 + PR.2.4.2 --> pm; PR.2.1.1 --> m: The National Strategy for Integrated Management of Solid Waste Until 2025, and Vision Toward 2050 To 2025 set up the target of recycling as follows: - To 2020: 85% of MSW will be recycled, reused, recovered for use as an energy source or to produce organic fertilizer. - To 2025: 90% of MSW will be recycled, re…
					PR.2.3.2 Small use of professional repair by small part of the population	pm	PR.2.4.1 High use of professional repair by big part of the population	na
					PR.2.3.3 Minimum one online spare market exists	pm	PR.2.4.2 Various online spare markets exist	pm	PR.2.5.2 Spare part markets are an integral part of CE	nm
					PR.2.3.4 Product service systems (sharing and leasing) are offered	pm			PR.2.5.3 Sharing and leasing are an integral part of CE	nm
			PR.2.2.2 Voluntary take-back systems for certain wastes (e.g. pharmaceuticals, batteries) exist	pm	PR.2.3.5 Introduction of take-back or deposit systems for certain wastes (e.g. beverage packaging)	nm	PR.2.4.3 Deposit obligation to all single-use beverage packaging and change of deposit contribution	nm	PR.2.5.4 Innovative take-back and collection systems enable reuse and high-quality recycling	nm
							PR.2.4.4 Introduction of deposits on material relevant products (e.g. tablets, smartphones)	nm
PR.3	PR.3.1.1 Companies neglect EoL issues of their products	pm	PR.3.2.1 Pioneer companies are considering EoL issues of their products	pm	PR.3.3.1 Through Eco-design several manufacturers are producing in a more environmental friendly way	pm	PR.3.4.1 Increased use of homogenous easy separable, harmfree and secondary materials; less use of disruptive substances	na	PR.3.5.1 High use of secondary, recyclable or biobased materials for product manufacture	nm	PR.3.1.1 + PR.3.1.2 + PR.3.1.3 + PR.3.2.1 + PR.3.2.2 + PR.3.3.1 --> pm; PR.4.1.1 + PR.4.2.1 --> pm: The Circular Economy Hub serves as an online platform to facilitate the exchange of information and data in connection with Article 139 of Decree 08/2022/ND-CP guilding the implementation of LEP 2020 between business and government. It aims to generate knowhow, enhance dialogue between stakeholders…
	PR.3.1.2 Innovative composite materials are causing disposal problems due to the negligence of EoL in the product design phase	pm					PR.3.4.2 Recyclability, durability and upgradability is generally considered in product design phase	na	PR.3.5.2 EoL concepts for innovative products prior to market introduction are elaborated to minimize problems at the EoL phase	nm
	PR.3.1.3 Companies neglect recyclability, material saving and substitution of hazardous substances during product design phase	pm	PR.3.2.2 Some companies consider recyclability, material savings and substitution of hazardous substances in product design phase	pm					PR.3.5.3 Product recyclability is one basic condition for product marketing	nm
							PR.3.4.3 Increasing life cycle assessment of products	na	PR.3.5.4 Almost all companies consider all life cycle phases	nm
					PR.3.3.2 Pioneer companies set voluntarly a minimum use rates for secondary resources in their products	na	PR.3.4.4 Legal minimum use rates for recyclates in plastic products: between ≥ 30 % and < 60 %	na	PR.3.5.5 Legal minimum use rates or recyclates in plastic products: ≥ 60 %	nm
PR.4	PR.4.1.1 Neglection of issues for proper waste disposal and waste avoidance in companies	pm	PR.4.2.1 Pioneer companies consider issues as improving their waste disposal and prevent waste	pm	PR.4.3.1 Evaluation of production processes	pm	PR.4.4.1 Inreased investigation of resource efficiency potentials	na	PR.4.5.1 Waste avoidance and closing loops practice in companies	nm
					PR.4.3.2 Substitution of some hazardous materials with non or less hazardous materials	na	PR.4.4.2 Several companies are substituting hazardous with non-hazardous substances	na	PR.4.5.2 Use of pollutants in CE, if controlled circulation considering thresholds is ensured	nm
PR.5	PR.5.1.1 WG: ≥ 2 kg/cap + d	nm	PR.5.2.1 WG: ≥ 1,5 < 2 kg/cap + d	nm	PR.5.3.1 WG: ≥ 1 < 1,5 kg/cap + d	nm	PR.5.4.1 WG: ≥ 0,5 < 1 kg/cap + d	m	PR.5.5.1 WG: < 0,5 kg/cap + d	nm	PR.5.4.1 --> m: Avergage waste generation rate in Hanoi is approximately 0.63 kg/cap/day. [11]
PR.6	PR.6.1.1 ZWI: ≤ 0,05	m	PR.6.2.1 ZWI: > 0,05 ≤ 0,15	nm	PR.6.3.1 ZWI: > 0,15 ≤ 0,4	nm	PR.6.4.1 ZWI: > 0,4 ≤ 0,9	nm	PR.6.5.1 ZWI: ≥ 0,9	nm	PR6.1.1 --> Vietnam is categorized in very low Zero Waste Index (ZWI) < 0.05
m	fully met
pm	partially met
nm	not met
na	not available

## Sheet: References
No	Title
1	CIRAD & INRA (2015). Solid Waste Topology and Management in Hanoi. Available online: https://umr-selmet.cirad.fr/content/download/4052/29638/version/3/file/IMV_REPORT_WASTETYPOLOGY_HANOI.pdf
2	United Nations Centre for Regional Development (2017). Country chapter State of the 3Rs in Asia and the Pacific - the Socialist Republic of Vietnam. Available online: https://www.uncrd.or.jp/content/documents/5696%5BNov%202017%5D%20Vietnam.pdf
3	Hoang, N.H.; Fogarassy, C. Sustainability Evaluation of Municipal Solid Waste Management System for Hanoi (Vietnam)—Why to Choose the ‘Waste-to-Energy’ Concept. Sustainability 2020, 12, 1085. https://doi.org/10.3390/su12031085
4	Vietname Recycles (2023). Vietnam Recycles Program. Available online: https://www.vietnamrecycles.com/en/for-households
5	UNEP (2015). SEA Circular Country Profile Vietnam. Available online: https://www.sea-circular.org/wp-content/uploads/2020/04/SEA-circular-Country-Briefing_VIET-NAM.pdf
6	Orissa International (2022). Vietnam to begin operation of largest Waste to Power Plant. Available online: https://www.orissa-international.com/business-news/vietnam-to-begin-operation-of-largest-waste-to-power-plant/
7	Giang NH et al.,(2020). Sustainable management and technologies for recycled construction demolition waste in Vietnam.
8	Vietnam Briefing (2022). Vietnam's circular economy Decision 687 Development Plan Ratified. Available online: https://www.vietnam-briefing.com/news/vietnams-circular-economy-decision-687-development-plan-ratified.html/
9	GIZ (2018). Country profile Viet Nam: Managing Municipal Solid Waste and Packaging Waste
10	Vietname Circular Economy (2023). About us - What is circular economy?. Available online: https://vietnamcirculareconomy.vn/about/?lang=en
11	Phuong, N.T.L.; Yabar, H.; Mizunoya, T. Characterization and Analysis of Household Solid Waste Composition to Identify the Optimal Waste Management Method: A Case Study in Hanoi City, Vietnam. Earth 2021, 2, 1046-1058. https://doi.org/10.3390/earth2040062
12	Zaman, A., Swapan, M. Performance evaluation and benchmarking of global waste management systems, Resources, Conservation and Recycling, Volume 114, 2016, Pages 32-41, ISSN 0921-3449, https://doi.org/10.1016/j.resconrec.2016.06.020.
13	Salhofer S, Jandric A, Soudachanh S, Le Xuan T, Tran TD. Plastic Recycling Practices in Vietnam and Related Hazards for Health and the Environment. Int J Environ Res Public Health. 2021 Apr 15;18(8):4203. doi: 10.3390/ijerph18084203. PMID: 33921067; PMCID: PMC8071425.
