# Supplementary material
Source: MDPI journal article supplement (https://www.mdpi.com/2813-0391/2/1/6)
Supplement: s1 [file s1 › WMS-DSC_Tool_2023_Jakarta.xlsx]

## Sheet: Results Overview
Overview of the results for the assessment of City, Country regarding								Overview of the results for the assessment of City, Country regarding
Governance, Sector and Market								Collection and Transport, Waste Disposal, Energy Recovery, Waste Recycling, Prevention and Reuse
		Stage 1	Stage 2	Stage 3	Stage 4	Stage 5				Stage 1	Stage 2	Stage 3	Stage 4	Stage 5
Governance	G.1 Duties and targets							Collection and transport	CT.1 Waste collection
	G.2 Laws, Regulations and Agreements								CT.2 Service provider
	G.3 Nomenclature								CT.3 Collection rates
	G.4 National level WM								CT.4 Separate collection
	G.5 Regional level WM								CT.5 Collection of recyclables
	G.6 Municipal level WM								CT.6 Waste transport
	G.7 Stakeholder cooperation								CT.7 Transfer stations
	G.8 Control mechanisms								CT.8 Collection of hazardous wastes
	G.9 Authorization and public participation							Waste disposal	WD.1 Waste disposal
	G.10 Quality standards and threshold values								WD.2 Operational measures
	G.11 Data collection, reporting and evaluation								WD.3 Leachate water management
	G.12 Education								WD.4 Landfill gas management
	G.13 Research								WD.5 Other means of disposal
	G.14 Awareness building							Energy recovery	ER.1 Thermal disposal and energy recovery
	G.15 Occupational health and safety								ER.2 Incineration plants
	G.16 Environmental protection								ER.3 Energy and raw material recovery
Sector and Market	SM.1 Sector development							Waste recycling	WR.1 Waste recycling
	SM.2 Jobs								WR.2 Composting
	SM.3 Informal sector								WR.3 Fermentation
	SM.4 WM system structure and organization								WR.4 Sorting and recycling plants
	SM.5 Financial funding								WR.5 Refuse derived fuel
	SM.6 Enterprises								WR.6 Recycling of construction and demolition waste
	SM.7 Recycling market								WR.7 Recycling rates
									WR.8 Diversion rate and Circular material use rate
								Prevention and reuse	PR.1 Prevention
									PR.2 Circular business and usage models
									PR.3 Product design
									PR.4 Process optimization and operational disposal strategies
									PR.5 Waste generation
									PR.6 Zero-waste index
								m	Subcomponent is met
								pm	Subcomponent is partly met
									Subcomponent is not met or data is not available

## Sheet: Governance
	Stage 1		Stage 2		Stage 3		Stage 4		Stage 5		Rationale / Source
Governance - Legislation and other policy measures (G.1 - G.6)
G.1	G.1.1.1 National waste management (WM) targets are missing		G.1.2.1 Definition of preliminary WM targets in legislation		G.1.3.1 Targets include climate and environmental aspects		G.1.4.1 WM targets based on UN SDGs		G.1.5.1 Achievement of ambitious targets regarding CE and waste avoidance
					G.1.3.2 Time-dependent targets for sustainable WM systems exist		G.1.4.2 Formulation of targets for CE and Zero-Waste targets
					G.1.3.3 Regular review of WM targets; (non-)achievement is communicated openly		G.1.4.3 Change in wording from WM to CE
			G.1.2.2 Waste disposal is state responsibility
	G.1.1.2 Missing of waste hierarchy				G.1.3.4 Introduction of a 5-stage waste hierarchy: 1. prevention - 2. reuse - 3. recycling - 4. energy recovery - 5. disposal
G.2	G.2.1.1 National waste disposal law is missing or in preparation		G.2.2.1 Preliminary waste disposal law is in force		G.2.3.1 Regulatory framework for WM consists of comprehensive laws and associated directives		G.2.4.1 Constant development of laws and directives (each 5 years) to promote CE and react to global challenges		G.2.5.1 CE is promoted more by market drivers than by legal regulations
			I) Formulation of definitions by law for "waste" and various waste types		I) Mandatory recyclables collection from households		I) Mandatory recyclables collection from businesses
			II) Responsibility and role of divers stakeholders in WM are identified		II) Substance or product bans		II) Financial incentives and eco-labels to promote sustainable products and processes
			III) Sanctions for non-compliances are anchored in waste laws		III) Ban of combined disposal of hazardous and non-hazardous waste		III) Minimum use rates for recyclates in product manufacturing
							IV) Regulation of "right to repair" and further incentives to promote CE
			G.2.2.2 Guidelines for local authorities specify how waste laws and policies shall be implemented		G.2.3.2 Technical instructions and implementation regulations are legally binding		G.2.4.2 Interlinking of legal areas to counteract illegal waste transports
					G.2.3.3 Media related (e.g. soil, air) laws or ordinances come into force
					G.2.3.4 All international agreements related to WM are ratified		G.2.4.3 Fulfillment of duties from international conventions
							G.2.4.4 At least 50% of public procurement are ecologically efficient or environ. friendly goods		G.2.5.2 80% of goods for public procurement are ecologically efficient or environtally friendly
					G.2.3.5 Introduction of extended producer responsibility (EPR)		G.2.4.5 EPR transfers more responsibility to manufacturers		G.2.5.3 Cross-border EPR enables distribution of responsibility along global supply chains
							G.2.4.6 Implementation of ecological evaluation of license fees regarding EPR
							G.2.4.7 Extension of EPR beyond national borders along supply chains
G.3	G.3.1.1 Lack of standardized nomenclature for waste		G.3.2.1 Introduction of simple nomenclature for certain types of wastes (organics, residuals, plastics, metals, glass)		G.3.3.1 Detailed nomenclature for waste types with differentiation between non-hazardous and hazardous waste exist		G.3.4.1 Regluar update of waste nomenclature (incl. new waste and state of the art processes)		G.3.5.1 (Supra-)National collection of waste data enables targeted introduction of measures
G.4	G.4.1.1 Central body responsible for WM strategies/policies is missing		G.4.2.1 Central body responsible for WM strategies/policiesexists
			G.4.2.2 National environmental regulatory authority exists
	G.4.1.2 National WM program specifying measures for waste sector development is lacking		G.4.2.3 National WM program specifying measures for waste sector development exists		G.4.3.1 National waste prevention programs are published		G.4.4.1 Regular revisions (max. 5 years) of WM programs, plans and concepts focussing on climate and resource aspects
			G.4.2.4 National WM plan exists
			G.4.2.5 Concepts for safe disposal of hospital waste exist		G.4.3.2 Existance of WM concepts for proper disposal or recycling of mining, construction, forestry, agricultural and hazardous waste
							G.4.4.2 Realization of globally led collective actions by government for sustainable resource management		G.4.5.1 Measures ensure the proper disposal of waste nationally and combat global environmental problems to a great extent
							G.4.4.3 Implementat measures to combat global problems related to improper disposal (marine and space debris, microplastics, etc.)
	G.4.1.3 Lack or fragile funding for WM activities		G.4.2.6 WM budget is set in the federal budget, but not guaranteed		G.4.3.3 Guaranteed and sufficient WM budget in the federal budget
	G.4.1.4 Lack of national funding to improve WM systems on regional or municipal level		G.4.2.7 Government grants financial aid to regions or municipalities
G.5	G.5.1.1 WM functions are dispersed across the regional administration; responsibilities are unclear		G.5.2.1 Central body responsible for regional WM strategies or policies and coordinating waste disposal and recovery exists		G.5.3.1 Regional responsibilities regarding waste disposal and recycling are clear and transparent				G.5.5.1 Regional efforts regarding CE lead to the rise of several circular cities
					G.5.3.2 Interdisciplinary cooperation with other authorities exist
					G.5.3.3 Effective mechanisms for siting waste treatment plants exist
	G.5.1.2 A regional WM law and plan is missing or in preparation		G.5.2.2 Regional waste law is in force		G.5.3.4 Regional waste laws are adapted to revised national laws		G.5.4.1 Regional WM laws, plans, strategies and concepts are revised and concretized regularly (max. 5 years) focusing more on climate and resource protection aspects
			G.5.2.3 Simplified regional WM plan is published		G.5.3.5 Detailed WM plan is in place
					G.5.3.6 Regional waste prevention programs are published
			G.5.2.4 Concepts for proper disposal of hospital waste exist		G.5.3.7 Regional concepts for mining, construction, agriculture, forestry and hazardous waste exist		G.5.4.2 Regional plans exist for sound waste disposal in catastrophic events (wars, pandemic, etc.)
	G.5.1.3 WM activities are reduced to a minimum due to lack of or fragile funding		G.5.2.5 More stable funding base for WM activities are available		G.5.3.8 Sufficient WM budget available to optimize WM on regional and municipal level		G.5.4.3 Supra-regional activities promoting CE are implemented
G.6	G.6.1.1 Lack of jurisdiction and competences of municipality to plan, finance and operate WM system or to outsource tasks		G.6.2.1 Municipality has jurisdiction and competences to plan, finance and operate WM system and outsource tasks		G.6.3.1 Institutional coherence in WM is transparent and publicly available		G.6.4.1 Municipality strives to become a "Circular City"		G.6.5.1 Preconditions for achieving status of "Circular City" are in place
	G.6.1.2 WM functions are spread across municipal institutions; responsibilities are unclear		G.6.2.2 Independent WM authority ensures municipal WM; some functions are still spread across municipal institutions
			G.6.2.3 Emerging of inter-municipal cooperation’s to carry out WM tasks more efficiently		G.6.3.2 Cooperation between WM and other municipal service sectors exist in city management
			G.6.2.4 Institutionalization of waste counseling for households commercial operators		G.6.3.3 Public WM companies and authorities use complaints mechanisms
	G.6.1.3 Municipal waste bylaw and WM concept is missing or in preparation		G.6.2.5 Municipal waste bylaw is in force		G.6.3.4 Waste bylaws are adapted to revised national and regional waste laws		G.6.4.2 Municipal WM bylaws and concepts are revised regularly (max. 5 years) focusing on climate and resource aspects
			G.6.2.6 Municipal WM concept is publicly available		G.6.3.5 Municipal waste prevention program is published		G.6.4.3 Municipal plans exist ensuring sound waste disposal in catastrophic events
	G.6.1.4 Due to lack of funding and high dependency on funds from higher levels WM activities are reduced to a minimun		G.6.2.7 Stable funding base for WM activities exists		G.6.3.6 Municipal WM budget is sufficient		G.6.4.4 Activities promoting CE in cooperation with foreign municipalities exist.
	G.6.1.5 Uneconomic waste collection and disposal		G.6.2.8 Cost accounting / budgeting methods determine WM costs
Governance - Administration and monitoring (G.7 - G.11)
G.7	G.7.1.1 Missing interaction opportunities between public sector and relevant WM stakeholders		G.7.2.1 Platforms and committees emerge promoting exchange between public sector and other WM stakeholders		G.7.3.1 Several platforms and committees exist and are essential for stakeholder exchange		G.7.4.1 Competency centers are established to improve the exchange between relevant WM stakeholders		G.7.5.1 Innovative digital exchange formats improve exchange of information between WM stakeholders
G.8	G.8.1.1 Lack of governmental bodies which monitor and control WM activities		G.8.2.1 Government control bodies to monitor WM activitiesexist		G.8.3.1 Certification and accreditation bodies exist		G.8.4.1 Successful transfer of WM tasks to private and PPP companies due to skilled supervisory institution.		G.8.5.1 Reduction of state regulation due to functioning self-regulation and compliance with existing rules by business and society
			G.8.2.2 Regional councils exist for the lawful enforcement of WM		G.8.3.2 Local authorities monitor activities of firms performing municipal WM functions
					G.8.3.3 Introduction of regulated and recognized certification of specialized WM companies		G.8.4.2 Standardized requirements for expert qualification and for inspection performance
							G.8.4.3 Introduction of regular training of experts
			G.8.2.3 Selective monitoring of compliance with legal requirements		G.8.3.4 Introduction of stricter controls		G.8.4.4 State controls increase to verify the compliance of labor and worker protection measures		G.8.5.2 Control mechanisms work well to identify and sanction illegal behavior and activities in CE
					G.8.3.5 State controls are carried out selectively to inspect labor and working conditions
					G.8.3.6 Transport controls of imported / exported waste and recycled materials take place		G.8.4.5 Regular transport inspections increase detection of illegal disposal routes
			G.8.2.4 Monitoring of construction, operation and aftercare of landfills is carried out selectively		G.8.3.7 Monitoring of all landfills and waste treatment plants take place		G.8.4.6 Strict monitoring of all emissions from landfills and other treatment plants
			G.8.2.5 Sanctions are imposed rarely in case of violations in WM		G.8.3.8 Sanctioning in case of legal violations is increasing		G.8.4.7 Incorrect practices in CE decrease
			G.8.2.6 Introduction of control mechanisms to limit corruption and monopoles, but barely applied		G.8.3.9 Development of anti-corruption mechanisms lead to an increased detection of corruption				G.8.5.3 Corruption is almost contained due to functioning control mechanisms
							G.8.4.8 Monopolies in CE are regulated		G.8.5.4 Prevention of corporate monopolies in the WM sector
G.9	G.9.1.1 Lack of regulated and systematic official authorization procedures		G.9.2.1 Implementation of official authorization procedures for WM plants		G.9.3.1 Mandatory public participation for large-scale WM plants in authorization procedures		G.9.4.1 Participation of recognized NGOs in hearing procedures		G.9.5.1 Full transparency of authorization procedures is guaranteed
	G.9.1.2 Public participation is missing in authorization procedures		G.9.2.2 Public participation is included in authorization procedures		G.9.3.2 Public participation in political WM decisions		G.9.4.2 Public participation in political decision-making processes regarding CE
G.10	G.10.1.1 Lack of quality standards and emission limits for waste disposal/treatment plants		G.10.2.1 Quality standards and emission limits for waste disposal and treatment plants exist		G.10.3.1 Permission requirements for disposal and treatment plants are tightened		G.10.4.1 Emission limits and quality standards for disposal and treatment plants are updated and tightened regularly (max. every 5 years)		G.10.5.1 Tightened emission limits and quality standards reduce environmental risks to a minimum
					G.10.3.2 Emission limits and quality standards are uniform and nationally coordinated
	G.10.1.2 Lack of quality standards (e.g. pollutant limits) for secondary materials		G.10.2.2 Quality standards and pollutant limits for certain secondary materials exist		G.10.3.3 Introduction of standardized national quality standards for certain secondary materials (e.g., plastics, glass, compost) and substitute fuels		G.10.4.2 Expansion of and tighten quality standards increases the quality of secondary materials and refuse derived fuels (RDFs)
			G.10.2.3 Emerging institutions to promote standards for secondary materials and fuels
G.11	G.11.1.1 Missing data on waste collection and disposal (quantity, type, etc.)		G.11.2.1 Introduction of waste collection and disposal records		G.11.3.1 Data for all disposed wastes are documented and updated annually		G.11.4.1 Standardized registration and notification procedures for different wastes		G.11.5.1 Public availability of WM and other environmental data at all political levels
					G.11.3.2 Municipalities and regions are obliged to forward waste data to superior authorities
					G.11.3.3 Waste data is documented centrally and uniformly
					G.11.3.4 Establishment of different registration / notification procedures for various wastes and for its exports
			G.11.2.2 Introduction of a simple management information system (MIS) in public administration		G.11.3.5 Increase use of MIS in public administration		G.11.4.2 Use of innovative MIS to analyze large data amounts user-friendly and more quickly		G.11.5.2 Smart WM systems integrate large amounts of waste data in real time
	G.11.1.2 Lack of representative waste statistics at all political levels		G.11.2.3 Municipal or regional waste statistics are created without being publicly available		G.11.3.6 Waste statistics are publicly available		G.11.4.3 Data basis enables precise forecasts, meaningful reporting and is a basis for political decisions		G.11.5.3 (Supra-)National standardized benchmark indicators to evaluate WM systems exist
					G.11.3.7 Waste balances and forecasts through improved data
					G.11.3.8 Indicators are used to evaluate WM systems		G.11.4.4 Use of different indicators for WM systems monitoring
	G.11.1.3 Lack of specific collection, disposal, recovery and recycling rates		G.11.2.4 Collection, disposal, recovery and recycling rates are estimated on all political levels		G.11.3.9 Uniform collection, disposal and recycling rates exist on all political levels
Governance - Education and research (G.12 - G.14)
G.12	G.12.1.1 Lack of training opportunities to qualify personnel in WM		G.12.2.1 Availability of education and training opportunities train personnel in the field of WM		G.12.3.1 Emerging of job profiles for recycling or recovery		G.12.4.1 Expansion of qualification offers for specialized personnel in the field of CE (incl. also Zero-Waste, waste prevention, climate protection, etc.)		G.12.5.1 CE is an integral part of educational courses either for academics, pupils and workers.
			G.12.2.2 Emerging of specfic job profiles for waste collection, sorting, disposal and recovery		G.12.3.2 Adressing of WM issues in professions for which the handling of waste is relevant
			G.12.2.3 Available study programs without WM focus train specialists, who can be employed in WM		G.12.3.3 Introduction of WM study programs or environmental science to train academic staff
	G.12.1.2 Lack of educational programs for pupils in schools regarding WM		G.12.2.4 WM relevant topics are voluntarily addressed in schools		G.12.3.4 Increased teaching of WM topics in schools on a voluntary basis		G.12.4.2 Inclusion of CE and environmentally relevant topics in the curriculum of elementary and secondary schools
			G.12.2.5 Selective launching of educational pilot projects, which are financed externally
G.13	G.13.1.1 Lack of faculties which study WM issues alone or in cooperation with other countries		G.13.2.1 Establishing of research and development (R&D) faculties to study WM issues		G.13.3.1 Intensive promotion of R&D facilities on national/regional level		G.13.4.1 Interdisciplinary research centers are established to study on relevant CE issues
	G.13.1.2 Investigation of WM issues only by foreign disciplines, research institutions or firms		G.13.2.2 Cooperation’s with foreign research institutions or firms and country regarding research and education exist		G.13.3.2 Increasing number of nat. faculties studying or cooperating with other countries regarding WM research and education
	G.13.1.3 Research focus mainly on the setup of waste collection and disposal infrastructures		G.13.2.3 Research focus mainly on efficient collection, disposal and treatment of waste, and risk minimization (social and economic)		G.13.3.3 Research focus mainly on optimized and efficient waste recycling, risk minimization (social, economic and environmental) and resource efficiency		G.13.4.2 Research focus mainly on optimization of flows in CE, industrial symbiosis, digitalization, bioeconomy, waste prevention and Water-Waste-Soil Nexus		G.13.5.1 CE research projects are usually interdisciplinary and holistic
					G.13.3.4 WM issues are more likely studied interdisciplinary		G.13.4.3 Increase studies exploring CE potentials in companies
G.14	G.14.1.1 Lack of awareness campaigns regarding WM		G.14.2.1 WM awareness campaigns are carried out on some political levels		G.14.3.1 Implementation of national or municipal initiatives/projects to raise WM awareness		G.14.4.1 Awareness campaigns especially to promote waste prevention and closing loops are carried out on all political levels
	G.14.1.2 Population neglects importance of WM and lives according to the "not-in-my-backyard" principle		G.14.2.2 Increasing awareness regarding WM knowledge and concerns in small part of the population		G.14.3.2 Society and some companies gain experience and acquire basic understanding of WM in the context of sustainability		G.14.4.2 Positive changes in attitude regarding CE in large parts of the population and companies		G.14.5.1 Behaviour changing of population and companies enable a sustainable CE
							G.14.4.3 Growing public participation in political decision-making processes regarding CE		G.14.5.2 Achieving of CE and zero-waste goals due increased awareness
Governance - Occupational safety, health and environmental protection (G.15 - G.16)
G.15	G.15.1.1 Neglection of occupational health and safety measures (OHSM) in WM sector		G.15.2.1 Increased implementation of OHSM in WM in formal sector and rarely in informal sector		G.15.3.1 OHSM are implemented entirely in formal sector and increasingly in informal sector		G.15.4.1 High level of occupational health and safety exists		G.15.5.1 Number of work-related accidents, illnesses, etc. is reduced to a minimum
	G.15.1.2 Accidents, illnesses, etc. of personnel occur frequently		G.15.2.2 First decrease of work-related accidents, illnesses, etc. are registered in formal sector		G.15.3.2 Decrease of work-related accidents, illnesses, etc. are registered in both sectors
	G.15.1.3 Waste pickers work and live under poor conditions at waste dumps/landfills		G.15.2.3 Only adults work at controlled landfills		G.15.3.3 Prohibition of living on landfills and child labor is fully realized
	G.15.1.4 Children work as waste pickers		G.15.2.4 Ban of living on landfills and child labor, but still exists
G.16	G.16.1.1 Neglection of climate and environmental aspects in decision-making processes (in politics, companies and society)		G.16.2.1 Integration of climate and environmental protection measures in WM		G.16.3.1 WM and pollution control are more significant in politics		G.16.4.1 Increase integration of WM issues (waste-to-energy, secondary raw materials) in resource and energy efficiency concepts		G.16.5.1 CE makes a significant contribution to a resource-efficient and low-GHG economy
			G.16.2.2 Emissions trading is applied; but GHG emissions from WM increase compared to 1990		G.16.3.2 Initial emission savings in WM; GHG emissions decrease by ≤ 10% compared to 1990		G.16.4.2 GHG emissions related to CE are >10% to ≤ 50% lower compared to 1990		G.16.5.2 GHG emissions from CE are > 50% lower compared to 1990
m	fully met
pm	partially met
nm	not met
na	not available

## Sheet: Sector and Market
	Stage 1		Stage 2		Stage 3		Stage 4		Stage 5		Rationale / Source
Sector and market (SM.1 - SM.7)
SM.1	SM.1.1.1 Existing WM sector is unstructured		SM.1.2.1 Institutional structuring of WM enables creation of sector		SM.1.3.1 WM is a part of the industrial policy		SM.1.4.1 Growing of WM sector especially in recycling and resource recovery		SM.1.5.1 Functioning CE due to close cooperation with other sectors
	SM.1.1.2 Neglection of interests of WM companies at political level due to missing lobby		SM.1.2.2 Formation of interests groups and associations, who represent interests of WM sector		SM.1.3.2 Integrative approaches to address WM challenges are developed through increased stakeholder dialogue		SM.1.4.2 Growing collaboration with other sectors to address CE challenges
SM.2	SM.2.1.1 Jobs in formal sector are available without requiring specific qualifications		SM.2.2.1 Certain jobs require appropriate qualification, but there is a lack of personnel		SM.2.3.1 Creation of many jobs in the WM sector (recycling sector)		SM.2.4.1 Creation of additional jobs in the recycling industry		SM.2.5.1 Increased demand of qualified specialized personnel for advanced high-tech facilities.
	SM.2.1.2 Lack of qualified staff and expertise in institutions dealing with WM issues		SM.2.2.2 Great employment potential in collection and sorting		SM.2.3.2 Great demand of qualified personnel for plant construction and operation		SM.2.4.2 Increasing recruitment of personnel for in-house waste disposal and recycling in companies.
SM.3	SM.3.1.1 Unstructured informal sector and self-reliant informal workers		SM.3.2.1 Formation of small communities of informal workers		SM.3.3.1 Reorganization of sector through cooperatives or umbrella organizations		SM.3.4.1 Complete formalization of the informal sector by integration into the formal sector
	SM.3.1.2 Neglection of informal sector's role by policy makers and public		SM.3.2.2 Role and contribution of informal sector is perceived by policy makers and public authorities		SM.3.3.2 Profession "Waste Picker" is recognized by policy makers and public authorities
	SM.3.1.3 High distrust of informal workers towards public sector		SM.3.2.3 First institutional attempts to integrate informal workers		SM.3.3.3 Emerging programs to integrate the informal workers in the formal sector
	SM.3.1.4 Informal sector is disadvantaged compared to formal sector		SM.3.2.4 Support from NGOs and development banks to improve rigths and working conditions		SM.3.3.4 Optimization of WM activities through waste picker experiences
	SM.3.1.5 Informal sector is accepted by a minority				SM.3.3.5 Informal sector is accepted by a majority
	SM.3.1.6 Share informal workers to total number of WM employees ≥ 35%		SM.3.2.5 Share informal workers to total number of WM employees < 35% and > 10%		SM.3.3.6 Share informal workers to total number of WM employees ≤ 10%
SM.4	SM.4.1.1 Waste disposal done by public or private companies and waste pickers is uncoordinated und inefficient		SM.4.2.1 Improving WM coordination between various actors, big inefficiencies remain		SM.4.3.1 Emerging of WM PPP-projects		SM.4.4.1 Interplay between small innovative and large companies in WM industry exists
					SM.4.3.2 Companies specialized in waste recycling/disposal need a specific certification to work in WM
					SM.4.3.3 Increased bureaucratic burdens due to strict controls on WM companies
					SM.4.3.4 Dual WM or other systems exist that fulfill disposal and recycling obligations of manufacturers, retailers and distributors		SM.4.4.2 Reliable and efficient dual WM or other systems with many service providers		SM.4.5.2 Ensuring high recycling and return rates due to dual WM or other system
SM.5	SM.5.1.1 WM projects are mostly financed externally (e.g. governmental organizations, development banks, NGO's)		SM.5.2.1 Higher financial support of national funders for WM development		SM.5.3.1 Increased (inter)national financial support for sustainable WM and CE		SM.5.4.1 Increased (inter)national financial support to promote CE incl. digitization, bioeconomy and waste prevention		SM.5.5.1 Financial support of R&D support helps achieve CE targets
			SM.5.2.2 Loans from banks for financially weak municipalities through state guarantees		SM.5.3.2 Financial support to implement clean production measures		SM.5.4.2 Increased funding for industrial/urban symbiosis and cooperations between companies and municipalities
	SM.5.1.2 Inefficiently used or misused funding, so that many projects fail		SM.5.2.3 Investments by municipalities are controlled and managed by the state		SM.5.3.3 Control mechanisms reduce misuse and inefficient use of funds				SM.5.5.2 Financial support is generally linked to compliance with sustainability criteria
	SM.5.1.3 Mis-subvention, mis-funding, double funding happen often		SM.5.2.4 Stricter conditions for subsidies; misuse and inefficient use of grants are still prevalent		SM.5.3.4 Identification and countering of double funding, failing subsidies, and misfunding
SM.6	SM.6.1.1 Neglection of WM issues by companies				SM.6.3.1 Mandatory participation (financially, organizational) of some companies (manufacturers, retailers, distributors) in WM		SM.6.4.1 Zero-Waste targets are defined at company level		SM.6.5.1 High company responsibility and transparency
					SM.6.3.2 Companies purchase insurances against caused environmental damages
					SM.6.3.3 Companies start with circular supply chains		SM.6.4.2 Companies use innovative MIS and blockchain to improve their processes sustainably
					SM.6.3.4 First company cooperation’s form industrial symbioses		SM.6.4.3 Implementation of large-scale projects on industrial or urban symbiosis
	SM.6.1.2 No product information for customers				SM.6.3.5 Manufacturers provide product information (e.g. hazardous ingredients, handling during use and disposal phases)		SM.6.4.4 Companies increasingly record material and waste flows and provide this to consumers and WM companies		SM.6.5.2 Products contain environmentally relevant information (e.g. footprints)
	SM.6.1.3 No business reports to improve WM				SM.6.3.6 First environmental business reports		SM.6.4.5 Environmental reports (with SDGs) are increasingly published by companies		SM.6.5.3 Environmental and sustainability reports are published by domestic and foreign importing companies.
					SM.6.3.7 Audits are carried out in companies
					SM.6.3.8 Few companies use eco labels and environmental certificates to promote their products		SM.6.4.6 Eco-Labels are used in mostly all products
SM.7	SM.7.1.1 Markets for waste and recyclables are small, mostly informal and unregulated; trade structures are non-transparent		SM.7.2.1 Recycling markets are expanding and self-regulated; trading structures remain non-transparent		SM.7.3.1 Trading structures for waste and recyclables are regulated and transparent		SM.7.4.1 Government incentives strengthen secondary resource market		SM.7.5.1 Automated logistics and market platforms simplified searching and purchasing of waste/secondary materials
					SM.7.3.2 Governmental measures regulate price fluctuations of certain secondary materials/fuels
					SM.7.3.3 Emerging of exchange plattforms for secondary products and wastes		SM.7.4.2 Strong connection of companies regarding exchange and trade of secondary materials
							SM.7.4.3 New actors participate in recyclables collection; revenues are invested in environmental and social projects
					SM.7.3.4 Secondary materials provide a small portion of industrial demand and generate revenues		SM.7.4.4 Large industrial demand cover through secondary materials		SM.7.5.2 Supply risks are reduced by a systematic CE
					SM.7.3.5 Difficulties for high-quality recyclates to enter the market or its use is inadequate (firing instead of recycling)		SM.7.4.5 Increased use of pure plastic recyclates, while use of mixed plastics decreases		SM.7.5.3 Strict limits enable high quality recyclates.
					SM.7.3.6 Secondary materials are perceived to be of low value due to missing quality information		SM.7.4.6 Improved information on secondary materials quality reduces biases
	SM.7.1.2 Import and export of waste and recyclables, is unregulated and occurs without compliance with any requirements		SM.7.2.2 Trading of wastes and recyclables occurs predominantly in the country		SM.7.3.7 Increasing trading of waste and recyclables with foreign countries		SM.7.4.7 Introduction of stricter import/export criteria for (non-) hazardous, hardly recyclable wastes and used goods		SM.7.5.4 Smart WM system enables real-time networking; secondary resources can automatically be traded globally
			SM.7.2.3 Restrictions may be imposed for import and export of wastes and recyclables, but controls occur selectively		SM.7.3.8 Insufficient controls on import/export bans of hazardous wastes encurages their illegal transport
m	fully met
pm	partially met
nm	not met
na	not available

## Sheet: Collection and Transport
	Stage 1		Stage 2		Stage 3		Stage 4		Stage 5		Rationale / Source
Collection and transport (CT.1 - CT.8)
CT.1	CT.1.1.1 Lack of systematic collection; limited collection	nm	CT.1.2.1 Collection is systematic, but inefficient	nm	CT.1.3.1 Efficient collection through optimizing measures and concepts	m	CT.1.4.1 Underground systems in public spaces	nm	CT.1.5.1 Waste bins have no negative effect on landscape	nm	CT.1.2.2 + CT.1.2.4 + CT.1.3.1 --> m; CT.1.2.3 + CT.1.3.2 + CT.13.3 --> pm: Waste management in Jakarta is carried out by local governments under the Environmental Agency (DLH). The current condition of waste management is still focusing on transporting waste from the source to the temporary waste storage and to the landfill. Municipal waste from households in Indonesia is the largest stream of M…
	CT.1.1.2 Lack of uniform collection bins	nm	CT.1.2.2 Use of uniform aboveground systems	m	CT.1.3.2 Use of new bin systems (e.g. waste locks)	pm	CT.1.4.2 Waste bins with fill level sensors	nm	CT.1.5.2 Avoid of container overfilling (smart bins)	nm
			CT.1.2.3 Collection points are within 200m distance	pm	CT.1.3.3 Service provision of cleaning up bins	pm	CT.1.4.3 Introduction of digitalization measures	pm	CT.1.5.3 Smart waste container separation	nm
	CT.1.1.3 Missing of basic principles of urban hygiene, major littering exists	nm	CT.1.2.4 Urban hygiene principles are partially met, but littering in public spaces remains a problem	m					CT.1.5.4 Full maintainance of urban hygiene principles and no littering in public spaces	nm
CT.2	CT.2.1.1 Collection mostly by waste pickers	nm	CT.2.2.1 Collection mostly by formal sector	pm	CT.2.3.1 Collection mostly by formal or organized informal sector	pm			CT.2.5.1 Waste collection exclusively by formal sector	nm	CT.2.2.1 + CT.2.3.1 --> pm: SWM usually relates to both formal and informal sectors. In Indonesia, the formal sector includes municipal agencies and formal businesses, whereas the informal sector consists of individuals, groups and small businesses engaging in activities that are not registered and are not formally regulated. In solid waste activities, the informal sector refers to recycling acti…
CT.3	CT.3.1.1 Collection rate (CR): urban ≤ 50% OR no data	nm	CT.3.2.1 CR: urban > 50 and ≤ 70%	nm	CT.3.3.1 CR: urban > 70 and ≤ 80%	nm	CT.3.4.1 CR: urban > 80 and ≤ 95%	m	CT.3.5.1 CR: urban > 95% and ≤ 100%	nm	CT.3.4.1 --> m; Around 45 to 50% of Indonesia’s MSW is collected overall. However this ranges from 98% in West Jakarta, 80% in Jakarta city [1]
	rural ≤ 30% OR no data	m	rural > 30 and ≤ 50%	na	rural > 50 and ≤ 80%	na	rural > 80 and ≤ 95%	na	rural > 95% and ≤ 100%	na
CT.4	CT.4.1.1 Collective collection of residual waste	m	CT.4.2.1 First forms of separation at source collection (2 fractions)	pm	CT.4.3.1 Mandatory waste collection for households and businesses (>3 fractions)	pm	CT.4.4.1 Reduction of illegal collection (e.g. electronics)	na	CT.4.5.1 All recyclables are collected separately	nm	CT.4.1.1 + CT.4.2.2 + CT.4.2.3 --> m; CT.4.2.1 + CT.4.3.1 --> pm: Waste at the source is still not segregated and a substantial amount of waste is directly dumped into open dumps or landfills. Recycable is collected from both formal and informal sector, where number of waste banks are spreading throughout the country. For medical waste, Indonesia produces approx. 294.66 tons per day, where the In…
	CT.4.1.2 Recyclables solely collected by waste pickers		CT.4.2.2 Recyclables collected by (in)formal sector	m	CT.4.3.2 Set up of recycling centers	pm
					CT.4.3.3 Rate of incorrect sorting > 30%	na	CT.4.4.2 Rate of incorrect sorting > 10 to ≤ 30%	na	CT.4.5.2 Rate of incorrect sorting ≤ 10%	na
			CT.4.2.3 Separate collection of hospital waste	m	CT.4.3.4 Separate collection of: electrical, construction, demolition, agricultural and forestry waste	pm
CT.5	CT.5.1.1 CR are missing, only estimations are available or data is not publicly available	m	CT.5.2.1 Recyclables CR:		CT.5.3.1 Recyclables CR:		CT.5.4.1 Recyclables CR:		CT.5.5.1 Recyclables CR:		CT.5.2.1 --> m: Collection rate of sepecifc waste stream is not available
			Metals: ≤ 50%	na	Metals: > 50 and ≤ 70%	na	Metals: > 70 and ≤ 90%	na	Metals: > 90%	na
			Paper: ≤ 30%	na	Paper: > 30 and ≤ 70%	na	Paper: > 70 and ≤ 90%	na	Paper: > 90%	na
			Glass: ≤ 30%	na	Glass: > 30 and ≤ 70%	na	Glass: > 70 and ≤ 90%	na	Glass: > 90%	na
			Organics: ≤ 30%	na	Organics: > 30 and ≤ 70%	na	Organics: > 70 and ≤ 90%	na	Organics: > 90%	na
			Plastics : ≤ 10%	na	Plastics: > 10 and ≤ 50%	na	Plastics: > 50 and ≤ 90%	na	Plastics: >90%	na
			Textiles: ≤ 10%	na	Textiles: > 10 and ≤ 50%	na	Textiles: > 50 and ≤ 90%	na	Textiles: >90%	na
CT.6	CT.6.1.1 Formal: Only use of simple vehicles	pm	CT.6.2.1 Formal: Mostly use of large fleets and automation	pm	CT.6.3.1 Formal: Waste firms improve vehicle fleets (incl. compactors, lifters).	m	CT.6.4.1 Use vehicles depending on waste type	na	CT.6.5.1 Higly engineered and fully automated vehicles	nm	CT.6.1.2 + CT.6.2.1 + CT.6.2.2 --> pm; CT.6.3.1 --> m: Formal waste collectors used to rent waste collection trucks from third partner until 2016. The Jakarta Sanitary Agency has distributed 352 new garbage trucks to offices all over the city to collect garbage because sanitary offices in the city also no longer rent garbage trucks. South Jakarta Sanitary Agency Head Budi Mulyanto said that his a…
	CT.6.1.2 Informal: Only use of pack animals, handcarts, etc.	pm	CT.6.2.2 Informal: Mostly use of small or modified vehicles	pm	CT.6.3.2 Informal: Mostly use of modernized small trucks	na	See WM 3.4.1
CT.7	CT.7.1.1 Direct transport of waste to landfills or dumps	nm	CT.7.2.1 Introduction of transfer stations (TS)	m	CT.7.3.1 TS increase collection efficiency	pm			CT.7.5.1 All existing TS are state of the art		CT.7.2.1 --> m; CT.7.2.2 + CT.7.3.1 + CT.7.3.2 --> pm: Temporary storage sites are established to reduce hauling distances for the collection trucks, thereby lowering transportation costs. At the temporary storage sites, waste is transferred to waste trucks by either manual labour or shovel loader. The waste is subsequently transported to intermediate treatment facilities (ITFs), waste banks, com…
	CT.7.1.2 Roads used as transfer areas for waste	nm	CT.7.2.2 Simple TS are unrestricted accessible to public	pm	CT.7.3.2 Advanced TS with restricted access to public.	pm
CT.8	CT.8.1.1 Lack of separate collection of hazardous waste (HW) from households	nm	CT.8.2.1 Small HW quantities from households are collected separatly	pm	CT.8.3.1 Disposal of small quantities of HW is free of charge	pm	CT.8.4.1 Full collection of HW flows	nm	CT.8.5.1 HW quantities are reduced to a minimum	na	CT. 8.2.1 + CT.8.3.1 + CT.8.3.2 --> pm: in Indonesia almost all hazardous waste treatment is managed by just one company at present, namely PT. PPLI (Prasada Pamunah Limbah Industri). Industries in Indonesia generate hazardous wastes about 229,907 tons per year. Unfortunately, Indonesia has only one treatment plant with international standard now, namely PT. PPLI. It is obviously foreseen that th…
	CT.8.1.2 Lack of separate collection of industrial HW	nm			CT.8.3.2 Industrial HW is collected almost separately	pm
m	fully met
pm	partially met
nm	not met
na	not available

## Sheet: Waste Disposal
	Stage 1		Stage 2		Stage 3		Stage 4		Stage 5		Rationale / Source
Waste disposal (WD.1 - WD.5)
WD.1	WD.1.1.1 Lack of targeted and centralized waste disposal	nm	WD.1.2.1 Targeted and centralized waste disposal in minimum controlled landfills	m	WD.1.3.1 Introduction of landfill classes	nm	WD.1.4.1 Mineral waste is predominantly landfilled	nm	WD.1.5.1 Waste landfilling gets less important	nm	Currently, the most common waste management methods are open dumping and burning in open spaces. Even though landfills were built in Jakarta, open dumping is still taking place. Attempts to adopt sanitary landfilling techniques have been unsuccessful, partly due to inappropriate designs and poor operational management. Jakarta uses a major landfill located at Bantargebang in the suburban town of …
	WD.1.1.2 Disposal in open dumps, uncontrolled landfills, roads etc.	pm	WD.1.2.2 Open burning and dumping is illegal, but still practiced	m	WD.1.3.2 Non-hazardous and hazardous waste are no longer disposed together	nm	WD.1.4.2 Recyclables are rarely landfilled	pm	WD.1.5.2 Small quantities of waste are landfilled	nm
	WD.1.1.3 Open burning for eliminiation and energy recovery	pm			WD.1.3.3 Liquid waste is no longer disposed in landfills	nm	WD.1.4.3 After-use of landfills gets more relevant	nm	WD.1.5.3 Reuse of closed landfill areas for other purposes	nm
					WD.1.3.4 Conversion of (in)active landfills to sanitary standard.	pm	WD.1.4.4 Waste is disposed exclusively on sanitary landfills	nm	WD.1.5.4 Importance of rehabilitation of old landfills	nm
							WD.1.4.5 Safe disposal of disaster waste on approved sites	nm	WD.1.5.5 Full avoidance of illegal dumping	nm
	WD.1.1.4 Open dump and controlled dump predominate	pm	WD.1.2.3 Controlled or engineered landfill predominate	pm			WD.1.4.6 Sanitary landfill predominates	nm	WD.1.5.6 All (in)active landfills have sanitary landfill standard	nm
WD.2	WD.2.1.1 Lack of disposal controls (waste registration)	nm	WD.2.2.1 Registration of waste type, etc. before disposal	m	WD.2.3.1 Registration and compaction of waste are the norm	pm			WD.2.5.1 All existing and new landfills comply with the current state of art	nm	WD.2.2.1 + WD.2.2.5 --> m; WD.2.2.2 + WD.2.2.3 + WD.2.2.4 + WD.2.3.1 + WD.2.3.3 --> pm: The Landfill has been in operation since 1989 and covers an area of 108 hectares divided into five waste deposition zones. It was designed to handle 19 million m3 of waste and still expandable. Since its opening, approximately 8.3million m 3 of waste had been deposited. Prior to this undertaking, the Landfill …
	WD.2.1.2. Waste is burned on dumping sites	nm	WD.2.2.2 Waste burning on landfill sites is missing	pm	WD.2.3.2 Systematic pre-treatment of waste is mandatory	nm
	WD.2.1.3 Landfill access controls are lacking or inadequate	nm	WD.2.2.3 Compaction and daily cover of waste	pm	WD.2.3.3 Systematic landfill management is carried out	pm
			WD.2.2.4 Site drawing showing landfill boundary and filling area in place	pm	WD.2.3.4 Realization of measures for (post-)closure management	na
	WD.2.1.4 Dumping sites are not staffed or only in short times for site checking	nm	WD.2.2.5 Site is staffed during operational hours	m
WD.3	WD.3.1.1 Leachate infiltrates soil or evaporates	pm	WD.3.2.1 Available leachate collection	pm	WD.3.3.1 Leachate collection and treatment in all active landfills	pm	WD.3.4.1 Compliance of strict limits at water monitoring	na	WD.3.5.1 Decrease of leachate and toxicity	na	WD.3.1.1 + WD.3.2.1 + WD.3.2.1 + WD.3.2.2 ---> pm; WD.4.1.1 + WD.4.2.1 + WD.4.3.1 --> There is a project from UNFCC funded back in 2012 for mmprovement of existing infrastructure of Bantargebang including: the expansion of the sanitary landfill areas, refurbishment of (damaged) infrastructures such as leachate drainage, upgrade of waste-water treatment plant and perimeter fences, waste reception …
	WD.3.1.2 Lack of surface and groundwaster monitoring	pm	WD.3.2.2 Recirculation of leachate in the landfill body	pm
			WD.3.2.3 Surface and groundwater is monitored	na
WD.4	WD.4.1.1 Landfill gas is released into the atmosphere	pm	WD.4.2.1 Implementation of passive collection or flaring of landfill gas	pm	WD.4.3.1 Landfill gas collection for energy recovery and gas monitoring	pm	WD.4.4.1 Compliance of strict limits for gas monitoring	na	WD.4.5.1 Controlled flaring of landfill gas only in emergencies and when it is unprofitable (small gas quantities)	na
WD.5	WD.5.1.1 Waste burning or dumping on high seas and coastal waters				WD.5.3.1 Waste burning or dumping on high seas and coastal waters is prohibited, but still takes place	m			WD.5.5.1 Avoidance of waste burning or dumping on high seas and coastal waters		WD.5.3.1 --> m: Among the top 5 world largest marine litter, Indonesia aims to reduce marine plastic litter by 70% relative to business as usual by 2025, introducing taxes and ban on single use plastics across Indonesia, number of clean-up effort, raising awareness etc. [9]
m	fully met
pm	partially met
nm	not met
na	not available

## Sheet: Energy Recovery
	Stage 1		Stage 2		Stage 3		Stage 4		Stage 5		Rationale / Source
Energy Recovery (ER.1 - ER.3)
ER.1	ER.1.1.1 Controlled energy recovery or thermal disposal is missing	pm	Availability of organizational criteria:		ER.1.3.1 ER is used to treat large waste quantities of the city inside or outside the country	nm	ER.1.4.1 ER is essential treatment alternative	nm	ER.1.5.1 Incinerated waste amount decreases due to higher recycling rates	nm	The Jakarta Provincial Government has been trying to solve the problems regarding waste management by building an Intermediate Waste Management Facility or Intermediate Treatment Facility (ITF). ITF is a waste management facility in which rubbish collected is then selected, assessed, destroyed, burned, melted, and reduced water content based on the quality of the waste [6]. Based on the 2012-2032…
			I) controlled landfills	m	ER.1.3.2 Agreements regulate waste delivery, energy sales and pricing	nm
			II) qualified staff	pm	ER.1.3.3 At least 150.000 tons/y of suitable waste are available for incineration	m	ER.1.4.2 Lower heating value has to be at least 11 MJ/kg	nm
			III) systematic collection	m
			IV) Sorting at source is implemented	m
			V) Basic WM laws and rules are developed	m
			VI) Incineration plants are positioned in political plans	m
			VII) Political and social will is given	pm
			VIII) Total costs for the plant are secured	m
			IX) Public or private actors are experienced in managing incineration plants efficiently	m
			X) Spare parts can be purchased locally or imported	pm
			Availibility of technical criteria:
			I) stable supply of combustible waste	m
			II) lower heating value at least 7 MJ/kg	pm
			III) Bottom and fly ash can be treated safely	pm
	ER.1.1.2 Co-incineration of waste is missing	pm	ER.1.2.3 Co-incineration of specific waste or RDFs in industrial firing plants	pm	ER.1.3.4 ER as alternative for landfilling; energy-intensive industries often make use of it	nm
ER.2	ER.2.1.1 Waste incinerators are neither operating or planned in the country	nm	ER.2.2.1 Incineration plants (incl. flue gas cleaning - FGC) are in planning or construction in the country or simple incineration plants without FGC are in operation with engineered process controls (incl. continous monitoring and recording of operating parameters)	m	ER.2.3.1 Operation of waste incinerators with FGC	na	ER.2.4.1 High-tech and state of the art processes ensure reliability and safe emission elimination	nm	ER.2.5.1 Automatic and homogenous waste input	nm
					I) Continuous monitoring of operating parameters and emissions	na	ER.2.4.2 Flue gas controls compliant with applicable environmental standards	nm
					II) Monitoring systems are routinely calibrated	na
					III) Maintenance plans or schedules are in place	na
					IV) Evidence that equipment is well maintained	na
					V) Fire extinguishers available on site	na
ER.3	ER.3.1.1 Raw material and ER through controlled waste incineration is missing	m	ER.3.2.1 Possible recovery of energy through waste incineration	nm	ER.3.3.1 Selling of recovered energy (electrical, thermal, combination)	nm			ER.3.5.1 Increased replacing of primary energy resources	nm
					ER.3.3.2 Incineration or RDF plants are located in areas with moderate heat demand and good transport and energy infrastructure exists	nm
			ER.3.2.2 Recycling of incineration residues is missing	nm	ER.3.3.3 Recovered metals from incineration process are sold; other by-products are treated safely, but recycled rarely	nm	ER.3.4.1 Increased recycling and reuse of slags	nm	ER.3.5.2 Almost complete reintroduction of by-products from incineration into the economic cycle	nm
m	fully met
pm	partially met
nm	not met
na	not available

## Sheet: Waste Recycling
	Stage 1		Stage 2		Stage 3		Stage 4		Stage 5		Rationale / Source
Waste recycling (WR.1 - WR.8)
WR.1	WR.1.1.1 Material recycling is rarely done, but open-loop recycling and downcycling predominate	nm			WR.1.3.1 Extension of waste treatment by mechanical, biological, etc. treatment options	pm	WR.1.4.1 (Semi-)closed-loop recycling and upcycling increase	pm	WR.1.5.1 (Semi-)closed-loop recycling dominates	nm	WR.1.3.1 + WR.1.4.1 + WR.1.4.2 --> pm; WR.1.3.2 --> m; Indonesia has at least 22 plastic recycling companies [9]. However, recycling plants in Indonesia are currently unregulated and many operate without sufficient operational health and safety practices. The varying degree of uncertainties in the methods/technologies used for recycling makes it difficult to precisely estimate the actual GHG emis…
							WR.1.4.2 Dialogues between manufactures and recyclers take place to identify and solve recycling problems	pm	WR.1.5.2 Implementation of circular bioeconomy	nm
	WR.1.1.2 Ensured input for recycling plants is lacking	nm			WR.1.3.2 Input for recycling plants is partly ensured	m	WR.1.4.3 Input for recycling plants is fully ensured	nm
WR.2	WR.2.1.1 Organic waste is landfilled or is composted at home or used as animal food	pm	WR.2.2.1 Recycling of organics in simple or open composting plants or with mobile aggregates	m	WR.2.3.1 Introduction of static, closed composting in tunnels / containers with sorting technologies	m	WR.2.4.1 Integration of (quasi-) dynamic processes in existing plants	na	WR.2.5.1 Microplastics is removed from compost	nm	WR.2.1.1 + WR.2.2.2 + WR.2.3.2 --> pm; WR.2.2.1 + WR.2.3.1 --> m; There are in total of 242 compost site in Indonesia. [8] Currently, 15 MRFs are operational in the surroundings of Jakarta, Yogyakarta and Surabaya, further recycling yards are planned. Approximately 8,600 households are benefitting from waste collection and waste management; Every single recycling facility produces an average of 8…
			WR.2.2.2 Compost has low compost quality	pm	WR.2.3.2 Increased use of compost in agriculture & landscape management	pm	WR.2.4.2 High quality compost, which still contains microplastic	na	WR.2.5.2 Very high quality and purity level of compost	nm
							WR.2.4.3 Increased use of compost in the private sector	na
WR.3	WR.3.1.1 No planned or operation fermentation plants	nm	WR.3.2.1 Planning or construction of fermentation plants	m	WR.3.3.1 Fermentation plants recycle organics	m			WR.3.5.1 Biogas plants are an essential component of CE	nm	WR.3.2.1 + WR.3.3.1 --> m; WR.3.3.3 --> pm: Indonesia Domestic Biogas Program (IDBP) is a multi-stakeholder’s program which has purpose to disseminating a renewable energy through build a small-scale household biodigester system called Biogas Rumah (BIRU) in around 11 provinces since 2009. IDBP’s main goal is to create market for domestic biogas. By the end of 2019, IDBP has constructed about 24,…
					WR.3.3.2 Separation of impurities for energetical use of biogas (e.g. in combined heat and power plants)	na	WR.3.4.1 Introduction of CO2-separation stage at plants	na
							WR.3.4.2 Feeding of biomethan into the natural gas grid	na
					WR.3.3.3 Fermentation residues are used as fertilizers	pm	WR.3.4.3 Very high quality of digestates	nm	WR.3.5.2 Mostly full removal of microplastics from digestates	nm
WR.4	WR.4.1.1 Manual sorting of recyclables	m	WR.4.2.1 Partially automated sorting of recyclables (incl. shredding and separation units)	m	WR.4.3.1 Increase of sorting efficiencies through mechanical separation, screening aggregates	m	WR.4.4.1 Generation of high-quality fractions through modern sorting facilities	na	WR.4.5.1 Increasingly digitalized recycling technologies	nm	WR.4.1.1 + WR.4.2.1 + WR.4.3.1 --> m; WR.4.1.2 + WR.2.2.2 + WR.4.3.2 --> pm: In 2018, there were 488 waste banks throughout the country, where waste is separated into recyclables, organics (to be composted) and residue (to be landfilled). These waste banks are generally set up in neighbourhoods to serve roughly 1 000 residents, who receive money for their waste. [9] This mainly perform manual sor…
	WR.4.1.2 Inefficient recovery of valuable materials from electronic waste	pm	WR.4.2.2 Recovery of metals and RDFs in mechanical-biological plants	pm	WR.4.3.2 Generation of high quality mono-fractions	pm			WR.4.5.2 Increasing use of digitalization measures to rise recyclability of products	nm
					WR.4.3.3 Use of stabilate processes to separate metals and RDFs	pm	WR.4.4.2 Production of methanol or synthesis gas from raw material plastic recycling	na
									WR.4.5.3 Safe recycling of waste containing harmful substances	nm
WR.5	WR.5.1.1 Lack of RDFs recovery from waste	nm	WR.5.2.1 Start of RDF recovery from waste treatment plants	m	WR.5.3.1 Increasing recovery of RDFs from waste	m			WR.5.5.1 RDF is decreasing due higher closed loop recycling	nm	WR.5.2.1 + WR.5.3.1 --> m: There are few number of RDF projects throughout Indonesia; for e.g. at the TPST Tritih Lor Village (Jeruklegi), Cilacap, Central Java. Processing municipal waste into RDF requires buyers or offtakers who will guarantee the purchase of RDF products in power generation facilities or cement plants as a substitute for coal. The officials regarded the RDF plants as a milesto…
WR.6	WR.6.1.1 Only conventional demolition of buildings	pm	WR.6.2.1 Mostly conventional demolition of buildings	pm	WR.6.3.1 Semi-selective demolition occurs predominantly	pm	WR.6.4.1 Predomination of selective demolition	nm	WR.6.5.1 Only selective demolition occurs	nm	WR. 6.1.1 + WR.6.1.3 + WR.6.2.1 + WR.6.1.3 + WR.6.3.1 + WR.6.3.2 + WR.6.3.3 --> pm: There are still few studies discussing the amount of construction waste generated in projects in the construction industry in Indonesia. Construction practitioners in Indonesia rarely calculate the amount of construction waste generation in their projects because it will add to the cost and time. In several buildi…
	WR.6.1.2 Depollution is done rarely	nm	WR.6.2.2 More frequent de-pollution	nm			WR.6.4.2 Depollution is usual practice in demolition	nm
	WR.6.1.3 C&D waste disposal on landfills/dumps predominates	pm	WR.6.2.3 Rare use of C&D material as filler or surface excavations	pm	WR.6.3.2 Increased use of C&D materials as filler or for landfill construction	pm	WR.6.4.3 Increased high quality recycled construction material	nm	WR.6.5.2 Almost complete recycling of C&D waste, little is landfilled	nm
					WR.6.3.3 Emerging of recycling routes for C&D materials (road construction)	pm	WR.6.4.4 Thermal treatment or landfilling of non-recyclable construction materials	nm	WR.6.5.3 Prohibition of non-recyclable materials for construction	nm
							WR.6.4.5 Use of robotics for efficient sorting	nm
WR.7	WR.7.1.1 Precise recycling rate numbers are missing	m	WR.7.2.1 Recycling rates:		WR.7.3.1 Recycling rates:		WR.7.4.1 Recycling rates:		WR.7.5.1 Recycling rates:		WR.7.1.1 --> m: The precise recycling rate for specific waste stream is missing. According to UNEP, the overall recycling rate is less than 50%. However, as for specific waste stream rate is majority not available, it is assigned to stage1.
			Metals: ≤ 40 %	na	Metals: > 40 and ≤ 70 %	na	Metals: > 70 and ≤ 90 %	na	Metals: > 90 %	na
			Paper: ≤ 40 %	na	Paper: > 40 and ≤ 70 %	na	Paper: > 70 and ≤ 90 %	na	Paper: > 90 %	na
			Glass: ≤ 40 %	na	Glass: > 40 and ≤ 70 %	na	Glass: > 70 and ≤ 90 %	na	Glass: > 90 %	na
			Composites: ≤ 20 %	na	Composites: > 20 and ≤ 60 %	na	Composites: > 60 and ≤ 90 %	na	Composites: > 90 %	na
			Plastics: ≤ 20 %	na	Plastics: > 20 and ≤ 60 %	na	Plastics: > 60 and ≤ 90 %	na	Plastics: > 90 %	na
			WR.7.2.2 Recycling rates:		WR.7.3.2 Recycling rates:		WR.7.4.2 Recycling rates:		WR.7.5.2 Recycling rates:
			E-Waste: > 10 and ≤ 40 %	na	E-Waste: > 40 and ≤ 70 %	na	E-Waste: > 70 and ≤ 90 %	na	E-Waste: > 90 %	na
			C&D waste: > 10 and ≤ 40 %	na	C&D waste: > 40 and ≤ 70 %	na	C&D waste: > 70 and ≤ 90 %	na	C&D waste: > 90 %	na
WR.8	WR.8.1.1 CMUR: ≤ 1 % OR no data	m	WR.8.2.1 CMUR: > 1 % ≤ 10 %	na	WR.8.3.1 CMUR: > 10 % ≤ 30 %	na	WR.8.4.1 CMUR: > 30 % ≤ 70 %	na	WR.8.5.1 CMUR: > 70 %	na	NA
	WR.8.1.2 DR: ≤ 0,1 OR no data	m	WR.8.2.2 DR: > 0,1 ≤ 0,2	na	WR.8.3.2 DR: > 0,2 ≤ 0,4	na	WR.8.4.2 DR: > 0,4 ≤ 0,7	na	WR.8.5.2 DR: > 0,7 ≤ 1,0	na
m	fully met
pm	partially met
nm	not met
na	not available

## Sheet: Prevention and Reuse
	Stage 1		Stage 2		Stage 3		Stage 4		Stage 5		Rationale / Source
Prevention and reuse (PR.1 - PR.6)
PR.1	PR.1.1.1 Prevention is motivated by poverty	pm	PR.1.2.1 Prevention is motivated by lack of resources	pm					PR.1.5.1 Decoupling of GDP and waste generation	nm	PR.1.1.1 + PR.1.3.1 + PR.1.3.2 + PR.1.4.1 + PR.1.4.2 + PR.1.4.4 --> pm: The report by the National Development Planning Agency that looked at 20 years’ worth of data showed that 23 to 48 million metric tonnes of food was dumped every year from 2000 to 2019, translating to between 115kg and 184kg of food per capita per year. The country faces another issue related to food, with some children suffe…
					PR.1.3.1 Higher political priority for food waste issues	pm	PR.1.4.1 Formulation of food waste avoidance targets and implementation of measures	pm	PR.1.5.2 Food waste is reduced to a minimum	nm
					PR.1.3.2 Few disposables are banned or permitted exceptionnally	pm	PR.1.4.2 All disposables are banned or permitted exceptionnally	nm	PR.1.5.3 CE reduces negative impacts of materials and products by avoiding resources or waste	nm
							PR.1.4.3 Prohibited destruction of unsold durable goods	nm	PR.1.5.4 Increase of bans for substances and products	nm
					PR.1.3.3 Emerging initiatives to educate the population regarding closing-loops	m			PR.1.5.5 CE provides long use of raw materials in the cycle	nm
							PR.1.4.4 Ensured lifetime-extension of buildings before construction	pm	PR.1.5.6 Full deconstruction of buildings is ensured before their realization	nm
									PR.1.5.7 Consumption decisions based on waste prevention	nm
PR.2	PR.2.1.1 Lack of circular business and usage models	nm	PR.2.2.1 Spare parts of End-of-life (EoL) products are used for repair	pm	PR.2.3.1 Increased use of EoL spare parts	pm			PR.2.5.1 Permanent provision of spare parts through digitalization	nm
					PR.2.3.2 Small use of professional repair by small part of the population	pm	PR.2.4.1 High use of professional repair by big part of the population	pm
					PR.2.3.3 Minimum one online spare market exists	m	PR.2.4.2 Various online spare markets exist	pm	PR.2.5.2 Spare part markets are an integral part of CE	na
					PR.2.3.4 Product service systems (sharing and leasing) are offered	m			PR.2.5.3 Sharing and leasing are an integral part of CE	na
			PR.2.2.2 Voluntary take-back systems for certain wastes (e.g. pharmaceuticals, batteries) exist	pm	PR.2.3.5 Introduction of take-back or deposit systems for certain wastes (e.g. beverage packaging)	nm	PR.2.4.3 Deposit obligation to all single-use beverage packaging and change of deposit contribution	nm	PR.2.5.4 Innovative take-back and collection systems enable reuse and high-quality recycling	nm
							PR.2.4.4 Introduction of deposits on material relevant products (e.g. tablets, smartphones)	nm
PR.3	PR.3.1.1 Companies neglect EoL issues of their products	pm	PR.3.2.1 Pioneer companies are considering EoL issues of their products	pm	PR.3.3.1 Through Eco-design several manufacturers are producing in a more environmental friendly way	m	PR.3.4.1 Increased use of homogenous easy separable, harmfree and secondary materials; less use of disruptive substances	pm	PR.3.5.1 High use of secondary, recyclable or biobased materials for product manufacture	nm
	PR.3.1.2 Innovative composite materials are causing disposal problems due to the negligence of EoL in the product design phase	pm					PR.3.4.2 Recyclability, durability and upgradability is generally considered in product design phase	m	PR.3.5.2 EoL concepts for innovative products prior to market introduction are elaborated to minimize problems at the EoL phase	nm
	PR.3.1.3 Companies neglect recyclability, material saving and substitution of hazardous substances during product design phase	pm	PR.3.2.2 Some companies consider recyclability, material savings and substitution of hazardous substances in product design phase	m					PR.3.5.3 Product recyclability is one basic condition for product marketing	nm
							PR.3.4.3 Increasing life cycle assessment of products	pm	PR.3.5.4 Almost all companies consider all life cycle phases	nm
					PR.3.3.2 Pioneer companies set voluntarly a minimum use rates for secondary resources in their products	na	PR.3.4.4 Legal minimum use rates for recyclates in plastic products: between ≥ 30 % and < 60 %	na	PR.3.5.5 Legal minimum use rates or recyclates in plastic products: ≥ 60 %	nm
PR.4	PR.4.1.1 Neglection of issues for proper waste disposal and waste avoidance in companies	nm	PR.4.2.1 Pioneer companies consider issues as improving their waste disposal and prevent waste	m	PR.4.3.1 Evaluation of production processes	pm	PR.4.4.1 Inreased investigation of resource efficiency potentials	pm	PR.4.5.1 Waste avoidance and closing loops practice in companies	na
					PR.4.3.2 Substitution of some hazardous materials with non or less hazardous materials	na	PR.4.4.2 Several companies are substituting hazardous with non-hazardous substances	na	PR.4.5.2 Use of pollutants in CE, if controlled circulation considering thresholds is ensured	na
PR.5	PR.5.1.1 WG: ≥ 2 kg/cap + d	nm	PR.5.2.1 WG: ≥ 1,5 < 2 kg/cap + d	nm	PR.5.3.1 WG: ≥ 1 < 1,5 kg/cap + d	nm	PR.5.4.1 WG: ≥ 0,5 < 1 kg/cap + d	m	PR.5.5.1 WG: < 0,5 kg/cap + d	nm	PR. 5.4.1 --> m: Jakarta generates 8,369 tonnes/day of MSW with a waste generation rate of 0.7 kg/capita/day [1]
PR.6	PR.6.1.1 ZWI: ≤ 0,05	nm	PR.6.2.1 ZWI: > 0,05 ≤ 0,15	m	PR.6.3.1 ZWI: > 0,15 ≤ 0,4	nm	PR.6.4.1 ZWI: > 0,4 ≤ 0,9	nm	PR.6.5.1 ZWI: ≥ 0,9	nm	PR. 6.3.1 --> Zero Waste index in low (0.06-0.10) [21]
m	fully met
pm	partially met
nm	not met
na	not available

## Sheet: References
Ref. No	Reference
1	Aretha APRILIA (2021). Waste management in Indonesia and Jakarta: Challenges and Way Forward. Background Paper 23rd ASEF Summer University
2	China Dialog (2021). The apps helping Indonesia's waste collectors. Available online: https://chinadialogue.net/en/cities/the-apps-helping-indonesias-waste-collectors/
3	Subadi, S. (2022). The Indonesian Government’s Regulation on the Management of COVID-19 Hazardous Medical Waste from Health Service Facilities and Self-Isolation Activities. Scientific Foundation SPIROSKI, Skopje, Republic of Macedonia Open Access Macedonian Journal of Medical Sciences. 2022 Feb 05; 10(B):1637-1641. https://doi.org/10.3889/oamjms.2022.9425
4	TEMPO.CO (2016). Garbage truck - Jakarta: Available online: https://en.tempo.co/read/734546/jakarta-now-uses-its-own-garbage-trucks
5	H Widyatmoko (2018). Management of Hazardous Waste in Indonesia. IOP Conf. Ser.: Earth Environ. Sci. 106 012032 DOI 10.1088/1755-1315/106/1/012032
6	Waste4Change (2022). How Electronic Waste is Managed in Indonesia. Available online: https://waste4change.com/blog/how-electronic-waste-is-managed-in-indonesia/
7	UNFCC (2012). Project 6486: Bantargebang Landfill Gas Management & Power Generation. Available online: https://cdm.unfccc.int/Projects/DB/RWTUV1340626014.25/view
8	GIZ (2018). Circular Economy Briefing Series: Country profile - Indonesia.
9	OECD (2021). Marine Plastic pollution in Indonesia.
10	Damayanti, P. et al., (2021). Waste to Energy in Sunter, Jakarta, Indonesia: Plans and Challenges. IOP Conf. Series: Earth and Environmental Science 940 (2021) 012033 doi:10.1088/1755-1315/940/1/012033
11	City of London (2020). Financing Waste infrastructure in Indonesia.
12	M I N Muhashiby et al- (2021). Waste management in Jakarta Recycling Centre: Case study of Pesanggrahan. IOP Conf. Ser.: Earth Environ. Sci. 940 012034
13	Atmosfair (2023). Indonesia: Decentralised Solid Waste Management (Compost). Available online: https://www.atmosfair.de/en/climate-protection-projects/biogas-biomass/indonesia/
14	BIRU (2019). Indonesia Domestic Biogas program. Available online: https://www.rumahenergi.org/wp-content/uploads/2020/11/AnnualReport-YRE-2019.pdf
15	IPEN (2022). Refuse Derived Fuel in Indonesia. Available online: https://ipen.org/sites/default/files/documents/ipen-rdf-pef-indonesia-v1_5aw-en.pdf
16	L Fitri et al. (2019). Managing Construction Waste in Developed Countries: Lessons Learned for Indonesia. IOP Conf. Ser.: Earth Environ. Sci. 366 012016
17	CNA (2023). Indonesia moves to tackle issues of food waste and malnutrition among some children. Available online: https://www.channelnewsasia.com/asia/indonesia-tackling-food-waste-malnutrition-2932531
18	Foodcycle (2023). About the organization. Available online: https://www.foodcycle.id/about
19	Ministry of National Development Planning Agency & Cleanomic (2021). The future is circular - uncovering Circular Economy Initiatives in Indonesia.
20	Systemmiq & APEKSI & APKASI (2021). Producer Responsibility in Indonesia. Available online: https://www.systemiq.earth/wp-content/uploads/2022/01/Producer-Responsibility-in-Indonesia2022.pdf
21	Zaman, A., Swapan, M. Performance evaluation and benchmarking of global waste management systems, Resources, Conservation and Recycling, Volume 114, 2016, Pages 32-41, ISSN 0921-3449, https://doi.org/10.1016/j.resconrec.2016.06.020.
