# Supplementary material
Source: MDPI journal article supplement (https://www.mdpi.com/2813-0391/2/1/6)
Supplement: s1 [file s1 › WMS-DSC_Tool_2023_KualaLumpur.xlsx]

## Sheet: Results Overview
Overview of the results for the assessment of City, Country regarding								Overview of the results for the assessment of City, Country regarding
Governance, Sector and Market								Collection and Transport, Waste Disposal, Energy Recovery, Waste Recycling, Prevention and Reuse
		Stage 1	Stage 2	Stage 3	Stage 4	Stage 5				Stage 1	Stage 2	Stage 3	Stage 4	Stage 5
Governance	G.1 Duties and targets							Collection and transport	CT.1 Waste collection
	G.2 Laws, Regulations and Agreements								CT.2 Service provider
	G.3 Nomenclature								CT.3 Collection rates
	G.4 National level WM								CT.4 Separate collection
	G.5 Regional level WM								CT.5 Collection of recyclables
	G.6 Municipal level WM								CT.6 Waste transport
	G.7 Stakeholder cooperation								CT.7 Transfer stations
	G.8 Control mechanisms								CT.8 Collection of hazardous wastes
	G.9 Authorization and public participation							Waste disposal	WD.1 Waste disposal
	G.10 Quality standards and threshold values								WD.2 Operational measures
	G.11 Data collection, reporting and evaluation								WD.3 Leachate water management
	G.12 Education								WD.4 Landfill gas management
	G.13 Research								WD.5 Other means of disposal
	G.14 Awareness building							Energy recovery	ER.1 Thermal disposal and energy recovery
	G.15 Occupational health and safety								ER.2 Incineration plants
	G.16 Environmental protection								ER.3 Energy and raw material recovery
Sector and Market	SM.1 Sector development							Waste recycling	WR.1 Waste recycling
	SM.2 Jobs								WR.2 Composting
	SM.3 Informal sector								WR.3 Fermentation
	SM.4 WM system structure and organization								WR.4 Sorting and recycling plants
	SM.5 Financial funding								WR.5 Refuse derived fuel
	SM.6 Enterprises								WR.6 Recycling of construction and demolition waste
	SM.7 Recycling market								WR.7 Recycling rates
									WR.8 Diversion rate and Circular material use rate
m	Subcomponent is met							Prevention and reuse	PR.1 Prevention
pm	Subcomponent is partly met								PR.2 Circular business and usage models
	Subcomponent is not met or data is not available								PR.3 Product design
									PR.4 Process optimization and operational disposal strategies
									PR.5 Waste generation
									PR.6 Zero-waste index
								m	Subcomponent is met
								pm	Subcomponent is partly met
									Subcomponent is not met or data is not available

## Sheet: Collection and Transport
	Stage 1		Stage 2		Stage 3		Stage 4		Stage 5		Rationale / Source
Collection and transport (CT.1 - CT.8)
CT.1	CT.1.1.1 Lack of systematic collection; limited collection	nm	CT.1.2.1 Collection is systematic, but inefficient	pm	CT.1.3.1 Efficient collection through optimizing measures and concepts	m	CT.1.4.1 Underground systems in public spaces	nm	CT.1.5.1 Waste bins have no negative effect on landscape	nm	CT.1.2.1 + CT.1.2.3 + CT.1.2.4 + CT.1.4.2 + CT.1.4.3 --> pm: The collection of municipal solid waste in Peninsular Malaysia was privatized and concessions were given to three companies to handle the waste collection in three different regions. The contractor in charge of the central and eastern region (Kuala Lumpur, Putrajaya and Pahang) of Peninsular Malaysia is Alam Flora Pvt Ltd. The Departmen…
	CT.1.1.2 Lack of uniform collection bins	nm	CT.1.2.2 Use of uniform aboveground systems	m	CT.1.3.2 Use of new bin systems (e.g. waste locks)	m	CT.1.4.2 Waste bins with fill level sensors	pm	CT.1.5.2 Avoid of container overfilling (smart bins)	nm
			CT.1.2.3 Collection points are within 200m distance	pm	CT.1.3.3 Service provision of cleaning up bins	m	CT.1.4.3 Introduction of digitalization measures	pm	CT.1.5.3 Smart waste container separation	nm
	CT.1.1.3 Missing of basic principles of urban hygiene, major littering exists	nm	CT.1.2.4 Urban hygiene principles are partially met, but littering in public spaces remains a problem	pm					CT.1.5.4 Full maintainance of urban hygiene principles and no littering in public spaces	nm
CT.2	CT.2.1.1 Collection mostly by waste pickers	nm	CT.2.2.1 Collection mostly by formal sector	pm	CT.2.3.1 Collection mostly by formal or organized informal sector	pm			CT.2.5.1 Waste collection exclusively by formal sector	nm	CT.2.2.1 + CT.2.3.1 --> pm: Informal sectors plays a critical role in plastic collection for recycling. Instead, the largest method for recycling was calculated as being due to individual households and businesses taking their recyclable waste to collection sites and selling it to waste traders, accounting for 46.5% of all recyclables generated. Similarly, the informal recycling sector is estimat…
CT.3	CT.3.1.1 Collection rate (CR): urban ≤ 50% OR no data	nm	CT.3.2.1 CR: urban > 50 and ≤ 70%	nm	CT.3.3.1 CR: urban > 70 and ≤ 80%	nm	CT.3.4.1 CR: urban > 80 and ≤ 95%	m	CT.3.5.1 CR: urban > 95% and ≤ 100%	nm	CT.3.4.1 --> m: Collection rate approx. 80%
	rural ≤ 30% OR no data	m	rural > 30 and ≤ 50%	na	rural > 50 and ≤ 80%	na	rural > 80 and ≤ 95%	nm	rural > 95% and ≤ 100%	nm
CT.4	CT.4.1.1 Collective collection of residual waste	nm	CT.4.2.1 First forms of separation at source collection (2 fractions)	pm	CT.4.3.1 Mandatory waste collection for households and businesses (>3 fractions)	pm	CT.4.4.1 Reduction of illegal collection (e.g. electronics)	nm	CT.4.5.1 All recyclables are collected separately	nm	CT.4.2.1 + CT.4.2.2 + CT.4.3.1 + CT.4.3.4 --> pm; CT.4.2.3 + CT.4.3.2 --> m: Since 1st September 2012, a ‘2+1 collection system’ had been implemented in the eight states under the National Solid Waste Management Department with waste collection being carried out once every two days for residual wastes and once every week for recyclable wastes, bulky wastes and green wastes. Separate at source is …
	CT.4.1.2 Recyclables solely collected by waste pickers	nm	CT.4.2.2 Recyclables collected by (in)formal sector	pm	CT.4.3.2 Set up of recycling centers	m
					CT.4.3.3 Rate of incorrect sorting > 30%	na	CT.4.4.2 Rate of incorrect sorting > 10 to ≤ 30%	na	CT.4.5.2 Rate of incorrect sorting ≤ 10%	na
			CT.4.2.3 Separate collection of hospital waste	m	CT.4.3.4 Separate collection of: electrical, construction, demolition, agricultural and forestry waste	pm
CT.5	CT.5.1.1 CR are missing, only estimations are available or data is not publicly available	m	CT.5.2.1 Recyclables CR:		CT.5.3.1 Recyclables CR:		CT.5.4.1 Recyclables CR:		CT.5.5.1 Recyclables CR:		CT.5.2.1 --> m: Collection rate for specific waste stream is missing.
			Metals: ≤ 50%	na	Metals: > 50 and ≤ 70%	na	Metals: > 70 and ≤ 90%	na	Metals: > 90%	na
			Paper: ≤ 30%	na	Paper: > 30 and ≤ 70%	na	Paper: > 70 and ≤ 90%	na	Paper: > 90%	na
			Glass: ≤ 30%	na	Glass: > 30 and ≤ 70%	na	Glass: > 70 and ≤ 90%	na	Glass: > 90%	na
			Organics: ≤ 30%	na	Organics: > 30 and ≤ 70%	na	Organics: > 70 and ≤ 90%	na	Organics: > 90%	na
			Plastics : ≤ 10%	na	Plastics: > 10 and ≤ 50%	na	Plastics: > 50 and ≤ 90%	na	Plastics: >90%	na
			Textiles: ≤ 10%	na	Textiles: > 10 and ≤ 50%	na	Textiles: > 50 and ≤ 90%	na	Textiles: >90%	na
CT.6	CT.6.1.1 Formal: Only use of simple vehicles	nm	CT.6.2.1 Formal: Mostly use of large fleets and automation	m	CT.6.3.1 Formal: Waste firms improve vehicle fleets (incl. compactors, lifters).	m	CT.6.4.1 Use vehicles depending on waste type	pm	CT.6.5.1 Higly engineered and fully automated vehicles	na	CT.6.2.1 + CT.6.3.1 --> m; CT.6.2.2 + CT.6.3.2 + CT.6.4.1 --> pm: Formal sector use new collection vehicles e.g. compactors (914 compactors in 2015),road sweeper (80) catch basin cleaner system (81), beach comber (5), high pressure jetter (95). Informal sector use small or modified vehicles and partly modernized small trucks.[3]
	CT.6.1.2 Informal: Only use of pack animals, handcarts, etc.	nm	CT.6.2.2 Informal: Mostly use of small or modified vehicles	pm	CT.6.3.2 Informal: Mostly use of modernized small trucks	pm	See WM 3.4.1
CT.7	CT.7.1.1 Direct transport of waste to landfills or dumps	nm	CT.7.2.1 Introduction of transfer stations (TS)	m	CT.7.3.1 TS increase collection efficiency	pm			CT.7.5.1 All existing TS are state of the art	nm	CT.7.2.1 + CT.7.3.2 --> m; CT.7.3.1 --> pm: About 95% of collected waste in Kuala Lumpur is sent to the Taman Beringin Transfer Station (TBTS) in Kepong, Kuala Lumpur. [2] The transfer station equipped with weightbridge waste recieving, compaction system, container semi trailer, tractor head, prime mover. Beside this, there is also a leachate treatment plant, odor and dust control system, deodize…
	CT.7.1.2 Roads used as transfer areas for waste	nm	CT.7.2.2 Simple TS are unrestricted accessible to public	nm	CT.7.3.2 Advanced TS with restricted access to public.	m
CT.8	CT.8.1.1 Lack of separate collection of hazardous waste (HW) from households	nm	CT.8.2.1 Small HW quantities from households are collected separatly	pm	CT.8.3.1 Disposal of small quantities of HW is free of charge	pm	CT.8.4.1 Full collection of HW flows	nm	CT.8.5.1 HW quantities are reduced to a minimum	nm	CT.8.1.1 + CT.8.2.1 + CT.8.3.1 --> pm; CT.8.3.2 --> m: In Malaysia, hazardous waste is referred as Scheduled waste. Under Environmental Quality (Scheduled Wastes) Regulations 2005, scheduled waste refers to any waste falling within the 107 categories (grouped into specific and non-specific sources) of hazardous waste listed in the First Schedule of the EQA, 1974. These wastes must be rendered as …
	CT.8.1.2 Lack of separate collection of industrial HW	nm			CT.8.3.2 Industrial HW is collected almost separately	m
m	fully met
pm	partially met
nm	not met
na	not available

## Sheet: Waste Disposal
	Stage 1		Stage 2		Stage 3		Stage 4		Stage 5		Rationale / Source
Waste disposal (WD.1 - WD.5)
WD.1	WD.1.1.1 Lack of targeted and centralized waste disposal	nm	WD.1.2.1 Targeted and centralized waste disposal in minimum controlled landfills	m	WD.1.3.1 Introduction of landfill classes	m	WD.1.4.1 Mineral waste is predominantly landfilled	na	WD.1.5.1 Waste landfilling gets less important	nm	WD.1.2.1 + WD.1.3.1 + WD.1.3.4 + WD.3.2.2 + WD.3.5.1 --> m; WD.1.2.2 + WD.1.3.2 + WD.1.4.2 + WD.1.4.3 + WD.2.2.1 + WD.2.2.2 + WD.2.2.3 + WD.2.2.4 + WD.2.2.5 + WD.2.3.1 + WD.2.3.2 + WD.2.3.3 + WD.3.1.1+ WD.3.2.2 + WD.4.1.1. + WD.4.2.1 + WD.4.3.1 --> pm: Country scale' According to the National Solid Waste Department, Malaysia currently has 165 landfills, eight sanitary landfills, and three inert l…
	WD.1.1.2 Disposal in open dumps, uncontrolled landfills, roads etc.	nm	WD.1.2.2 Open burning and dumping is illegal, but still practiced	pm	WD.1.3.2 Non-hazardous and hazardous waste are no longer disposed together	pm	WD.1.4.2 Recyclables are rarely landfilled	pm	WD.1.5.2 Small quantities of waste are landfilled	nm
	WD.1.1.3 Open burning for eliminiation and energy recovery	nm			WD.1.3.3 Liquid waste is no longer disposed in landfills	na	WD.1.4.3 After-use of landfills gets more relevant	pm	WD.1.5.3 Reuse of closed landfill areas for other purposes	nm
					WD.1.3.4 Conversion of (in)active landfills to sanitary standard.	m	WD.1.4.4 Waste is disposed exclusively on sanitary landfills	nm	WD.1.5.4 Importance of rehabilitation of old landfills	nm
							WD.1.4.5 Safe disposal of disaster waste on approved sites	na	WD.1.5.5 Full avoidance of illegal dumping	nm
	WD.1.1.4 Open dump and controlled dump predominate	nm	WD.1.2.3 Controlled or engineered landfill predominate	pm			WD.1.4.6 Sanitary landfill predominates	nm	WD.1.5.6 All (in)active landfills have sanitary landfill standard	nm
WD.2	WD.2.1.1 Lack of disposal controls (waste registration)	nm	WD.2.2.1 Registration of waste type, etc. before disposal	pm	WD.2.3.1 Registration and compaction of waste are the norm	pm			WD.2.5.1 All existing and new landfills comply with the current state of art	nm
	WD.2.1.2. Waste is burned on dumping sites	na	WD.2.2.2 Waste burning on landfill sites is missing	pm	WD.2.3.2 Systematic pre-treatment of waste is mandatory	pm
	WD.2.1.3 Landfill access controls are lacking or inadequate	nm	WD.2.2.3 Compaction and daily cover of waste	pm	WD.2.3.3 Systematic landfill management is carried out	pm
			WD.2.2.4 Site drawing showing landfill boundary and filling area in place	pm	WD.2.3.4 Realization of measures for (post-)closure management	na
	WD.2.1.4 Dumping sites are not staffed or only in short times for site checking	nm	WD.2.2.5 Site is staffed during operational hours	pm
WD.3	WD.3.1.1 Leachate infiltrates soil or evaporates	pm	WD.3.2.1 Available leachate collection	m	WD.3.3.1 Leachate collection and treatment in all active landfills	nm	WD.3.4.1 Compliance of strict limits at water monitoring	nm	WD.3.5.1 Decrease of leachate and toxicity	nm
	WD.3.1.2 Lack of surface and groundwaster monitoring	na	WD.3.2.2 Recirculation of leachate in the landfill body	pm
			WD.3.2.3 Surface and groundwater is monitored	na
WD.4	WD.4.1.1 Landfill gas is released into the atmosphere	pm	WD.4.2.1 Implementation of passive collection or flaring of landfill gas	pm	WD.4.3.1 Landfill gas collection for energy recovery and gas monitoring	pm	WD.4.4.1 Compliance of strict limits for gas monitoring	nm	WD.4.5.1 Controlled flaring of landfill gas only in emergencies and when it is unprofitable (small gas quantities)	nm
WD.5	WD.5.1.1 Waste burning or dumping on high seas and coastal waters				WD.5.3.1 Waste burning or dumping on high seas and coastal waters is prohibited, but still takes place	m			WD.5.5.1 Avoidance of waste burning or dumping on high seas and coastal waters		WD.5.3.1 --> m: Malaysia was listed as one of the twenty worst countries for dumping plastics into the ocean. According to Jambeck et al. (2015), Malaysia ranked number eight in the amount of plastic trash dumped into the sea. [1]
m	fully met
pm	partially met
nm	not met
na	not available

## Sheet: Energy Recovery
	Stage 1		Stage 2		Stage 3		Stage 4		Stage 5		Rationale / Source
Energy Recovery (ER.1 - ER.3)
ER.1	ER.1.1.1 Controlled energy recovery or thermal disposal is missing	nm	Availability of organizational criteria:		ER.1.3.1 ER is used to treat large waste quantities of the city inside or outside the country	pm	ER.1.4.1 ER is essential treatment alternative	pm	ER.1.5.1 Incinerated waste amount decreases due to higher recycling rates	nm	Organizational and technical criteria --> pm; ER.1.3.1 + ER.1.3.3 + ER.1.4.1 + ER.1.2.3 + ER.1.3.4 + ER.2.2.1 + ER.2.3.1 + ER.3.2.1 + ER.3.2.2 + ER.3.3.1 + ER.3.3.2 --> pm: In Malaysia, the use of incineration as WTE is only present in a very limited quantity at a small scale These included five units of small-scale incinerators of rotary kiln type that were erected in five tourism spots: Pulau L…
			I) controlled landfills	m	ER.1.3.2 Agreements regulate waste delivery, energy sales and pricing	na
			II) qualified staff	m	ER.1.3.3 At least 150.000 tons/y of suitable waste are available for incineration	pm	ER.1.4.2 Lower heating value has to be at least 11 MJ/kg	m
			III) systematic collection	m
			IV) Sorting at source is implemented	m
			V) Basic WM laws and rules are developed	m
			VI) Incineration plants are positioned in political plans	m
			VII) Political and social will is given	m
			VIII) Total costs for the plant are secured	m
			IX) Public or private actors are experienced in managing incineration plants efficiently	m
			X) Spare parts can be purchased locally or imported	pm
			Availibility of technical criteria:
			I) stable supply of combustible waste	m
			II) lower heating value at least 7 MJ/kg	pm
			III) Bottom and fly ash can be treated safely	m
	ER.1.1.2 Co-incineration of waste is missing	nm	ER.1.2.3 Co-incineration of specific waste or RDFs in industrial firing plants	pm	ER.1.3.4 ER as alternative for landfilling; energy-intensive industries often make use of it	pm
ER.2	ER.2.1.1 Waste incinerators are neither operating or planned in the country	nm	ER.2.2.1 Incineration plants (incl. flue gas cleaning - FGC) are in planning or construction in the country or simple incineration plants without FGC are in operation with engineered process controls (incl. continous monitoring and recording of operating parameters)	pm	ER.2.3.1 Operation of waste incinerators with FGC	pm	ER.2.4.1 High-tech and state of the art processes ensure reliability and safe emission elimination	nm	ER.2.5.1 Automatic and homogenous waste input	nm
					I) Continuous monitoring of operating parameters and emissions	pm	ER.2.4.2 Flue gas controls compliant with applicable environmental standards	nm
					II) Monitoring systems are routinely calibrated	pm
					III) Maintenance plans or schedules are in place	pm
					IV) Evidence that equipment is well maintained	pm
					V) Fire extinguishers available on site	m
ER.3	ER.3.1.1 Raw material and ER through controlled waste incineration is missing	nm	ER.3.2.1 Possible recovery of energy through waste incineration	pm	ER.3.3.1 Selling of recovered energy (electrical, thermal, combination)	pm			ER.3.5.1 Increased replacing of primary energy resources	nm
					ER.3.3.2 Incineration or RDF plants are located in areas with moderate heat demand and good transport and energy infrastructure exists	pm
			ER.3.2.2 Recycling of incineration residues is missing	pm	ER.3.3.3 Recovered metals from incineration process are sold; other by-products are treated safely, but recycled rarely	na	ER.3.4.1 Increased recycling and reuse of slags	nm	ER.3.5.2 Almost complete reintroduction of by-products from incineration into the economic cycle	nm
m	fully met
pm	partially met
nm	not met
na	not available

## Sheet: Waste Recycling
	Stage 1		Stage 2		Stage 3		Stage 4		Stage 5		Rationale / Source
Waste recycling (WR.1 - WR.8)
WR.1	WR.1.1.1 Material recycling is rarely done, but open-loop recycling and downcycling predominate	nm			WR.1.3.1 Extension of waste treatment by mechanical, biological, etc. treatment options	pm	WR.1.4.1 (Semi-)closed-loop recycling and upcycling increase	pm	WR.1.5.1 (Semi-)closed-loop recycling dominates	nm	WR.1.3.1. I+ WR.1.3.2 + WR.1.4.1 + WR.1.4.2 --> pm: in 2009, there are 15 recycling centres in Kuala Lumpur, 22 in Selangor operated, and 56 in Pahang operated by Alam Flora Sdn. Bhd [8]. MBT is seeing as alternative solutions for municipal solid waste treatment, however, there is an interests but no further details or plan can be found in public access at this stage.
							WR.1.4.2 Dialogues between manufactures and recyclers take place to identify and solve recycling problems	pm	WR.1.5.2 Implementation of circular bioeconomy	nm
	WR.1.1.2 Ensured input for recycling plants is lacking	nm			WR.1.3.2 Input for recycling plants is partly ensured	pm	WR.1.4.3 Input for recycling plants is fully ensured	nm
WR.2	WR.2.1.1 Organic waste is landfilled or is composted at home or used as animal food	pm	WR.2.2.1 Recycling of organics in simple or open composting plants or with mobile aggregates	pm	WR.2.3.1 Introduction of static, closed composting in tunnels / containers with sorting technologies	pm	WR.2.4.1 Integration of (quasi-) dynamic processes in existing plants	na	WR.2.5.1 Microplastics is removed from compost	nm	WR.2.1.1 + WR.2.2.1 + WR.2.2.2 + WR.2.3.1 --> pm: the Kuala Lumpur City Council (DBKL) had initiated campaigns to clean and beautify the Malaysian capital by converting food waste and organic waste into fertilizers through the Local Agenda 21 Kuala Lumpur (LA21KL) program. It is a program that is aimed to promote a cleaner and greener city through effective waste management. [1] https://www.freem…
			WR.2.2.2 Compost has low compost quality	pm	WR.2.3.2 Increased use of compost in agriculture & landscape management	na	WR.2.4.2 High quality compost, which still contains microplastic	na	WR.2.5.2 Very high quality and purity level of compost	nm
							WR.2.4.3 Increased use of compost in the private sector	na
WR.3	WR.3.1.1 No planned or operation fermentation plants	nm	WR.3.2.1 Planning or construction of fermentation plants	pm	WR.3.3.1 Fermentation plants recycle organics	m			WR.3.5.1 Biogas plants are an essential component of CE	nm	WR.3.2.1 + WR.3.3.3 --> pm; WR.3.33.1 --Y m; According to the World Biogas Association (2019), 68 MW of biogas capacity has been installed in Malaysia with an additional 73 MW approved and waiting for commencement. The feedstock for biogas plants in Malaysia is mainly from palm oil mill effluent (POME) (93%) and the second comes landfills (5%). Socioeconomic analysis is important to determine the…
					WR.3.3.2 Separation of impurities for energetical use of biogas (e.g. in combined heat and power plants)	na	WR.3.4.1 Introduction of CO2-separation stage at plants	na
							WR.3.4.2 Feeding of biomethan into the natural gas grid	na
					WR.3.3.3 Fermentation residues are used as fertilizers	pm	WR.3.4.3 Very high quality of digestates	na	WR.3.5.2 Mostly full removal of microplastics from digestates	nm
WR.4	WR.4.1.1 Manual sorting of recyclables	m	WR.4.2.1 Partially automated sorting of recyclables (incl. shredding and separation units)	m	WR.4.3.1 Increase of sorting efficiencies through mechanical separation, screening aggregates	pm	WR.4.4.1 Generation of high-quality fractions through modern sorting facilities	na	WR.4.5.1 Increasingly digitalized recycling technologies	nm	WR.4.1.1. + WR.4.2.1 --> m; WR.4.1.2 + WR.4.3.1 + WR.4.3.2 --Y pm: Kuala Lumpur is known to have an active recycling practice whereby residents sell their waste to waste traders and recycling centres. 10.1% of plastic waste (16,300 tonnes) is sorted for recycling, largely conducted by individual households and businesses taking their recyclable waste to waste collection sites and selling it to wa…
	WR.4.1.2 Inefficient recovery of valuable materials from electronic waste	pm	WR.4.2.2 Recovery of metals and RDFs in mechanical-biological plants	na	WR.4.3.2 Generation of high quality mono-fractions	pm			WR.4.5.2 Increasing use of digitalization measures to rise recyclability of products	nm
					WR.4.3.3 Use of stabilate processes to separate metals and RDFs	na	WR.4.4.2 Production of methanol or synthesis gas from raw material plastic recycling	na
									WR.4.5.3 Safe recycling of waste containing harmful substances	nm
WR.5	WR.5.1.1 Lack of RDFs recovery from waste	nm	WR.5.2.1 Start of RDF recovery from waste treatment plants	pm	WR.5.3.1 Increasing recovery of RDFs from waste	pm			WR.5.5.1 RDF is decreasing due higher closed loop recycling	na	WR.5.2.1 + WR.5.3.1 --> The Kajang WTE plant, which consists of a refuse-derived fuel (RDF) facility, is the most comprehensive incinerator as the system incorporates the refused-derived-facility (RFD) operation in Malaysia. WTE or refuse-derived-fuel technologies are both energy recovery initiatives currently emerging at Malaysia and are given priority in solid waste management. In 2008, the Kaj…
WR.6	WR.6.1.1 Only conventional demolition of buildings	pm	WR.6.2.1 Mostly conventional demolition of buildings	pm	WR.6.3.1 Semi-selective demolition occurs predominantly	nm	WR.6.4.1 Predomination of selective demolition	nm	WR.6.5.1 Only selective demolition occurs	nm	WR.6.1.1 + WR.6.1.2 + WR.6.1.3 + WR.6.2.1 + WR.WR.6.2.2 + WR.6.3.2 + WR.6.3.3 --> pm: Several studies have been conducted at Penang, Johor, Melaka, and Selangor from 2004 to 2013, shows the increasing of illegal dumping activities from construction waste from year to year. Thus, illegal dumping activities is an critical issue which 851 of illegal dumping area has been identified by SWCorp Malaysi…
	WR.6.1.2 Depollution is done rarely	nm	WR.6.2.2 More frequent de-pollution	pm			WR.6.4.2 Depollution is usual practice in demolition	na
	WR.6.1.3 C&D waste disposal on landfills/dumps predominates	pm	WR.6.2.3 Rare use of C&D material as filler or surface excavations	nm	WR.6.3.2 Increased use of C&D materials as filler or for landfill construction	pm	WR.6.4.3 Increased high quality recycled construction material	na	WR.6.5.2 Almost complete recycling of C&D waste, little is landfilled	nm
					WR.6.3.3 Emerging of recycling routes for C&D materials (road construction)	pm	WR.6.4.4 Thermal treatment or landfilling of non-recyclable construction materials	na	WR.6.5.3 Prohibition of non-recyclable materials for construction	nm
							WR.6.4.5 Use of robotics for efficient sorting	na
WR.7	WR.7.1.1 Precise recycling rate numbers are missing	m	WR.7.2.1 Recycling rates:		WR.7.3.1 Recycling rates:		WR.7.4.1 Recycling rates:		WR.7.5.1 Recycling rates:		WR.7.1.1. --> m: In 2022, the recycling rate of plastic improved, but the amount of plastic and general waste increased even more. Overall trash generated in Kuala Lumpur and Putrajaya last year stood at 796,795 metric tonnes of which plastic comprised 210,966 metric tonnes or 13 percent. The recycling rate for plastic was 18 percent while the recycling rate for all waste was 33.16 percent.[12] V…
			Metals: ≤ 40 %	na	Metals: > 40 and ≤ 70 %	na	Metals: > 70 and ≤ 90 %	na	Metals: > 90 %	na
			Paper: ≤ 40 %	na	Paper: > 40 and ≤ 70 %	na	Paper: > 70 and ≤ 90 %	na	Paper: > 90 %	na
			Glass: ≤ 40 %	na	Glass: > 40 and ≤ 70 %	na	Glass: > 70 and ≤ 90 %	na	Glass: > 90 %	na
			Composites: ≤ 20 %	na	Composites: > 20 and ≤ 60 %	na	Composites: > 60 and ≤ 90 %	na	Composites: > 90 %	na
			Plastics: ≤ 20 %	na	Plastics: > 20 and ≤ 60 %	na	Plastics: > 60 and ≤ 90 %	na	Plastics: > 90 %	na
			WR.7.2.2 Recycling rates:		WR.7.3.2 Recycling rates:		WR.7.4.2 Recycling rates:		WR.7.5.2 Recycling rates:
			E-Waste: > 10 and ≤ 40 %	na	E-Waste: > 40 and ≤ 70 %	na	E-Waste: > 70 and ≤ 90 %	na	E-Waste: > 90 %	na
			C&D waste: > 10 and ≤ 40 %	na	C&D waste: > 40 and ≤ 70 %	na	C&D waste: > 70 and ≤ 90 %	na	C&D waste: > 90 %	na
WR.8	WR.8.1.1 CMUR: ≤ 1 % OR no data	m	WR.8.2.1 CMUR: > 1 % ≤ 10 %	nm	WR.8.3.1 CMUR: > 10 % ≤ 30 %	nm	WR.8.4.1 CMUR: > 30 % ≤ 70 %	nm	WR.8.5.1 CMUR: > 70 %	nm	NA
	WR.8.1.2 DR: ≤ 0,1 OR no data	m	WR.8.2.2 DR: > 0,1 ≤ 0,2	nm	WR.8.3.2 DR: > 0,2 ≤ 0,4	nm	WR.8.4.2 DR: > 0,4 ≤ 0,7	nm	WR.8.5.2 DR: > 0,7 ≤ 1,0	nm
m	fully met
pm	partially met
nm	not met
na	not available

## Sheet: Prevention and Reuse
	Stage 1		Stage 2		Stage 3		Stage 4		Stage 5		Rationale / Source
Prevention and reuse (PR.1 - PR.6)
PR.1	PR.1.1.1 Prevention is motivated by poverty	pm	PR.1.2.1 Prevention is motivated by lack of resources	m					PR.1.5.1 Decoupling of GDP and waste generation	nm	PR.1.1.1 + PR.1.3.2 + PR.1.4.1 + PR.1.4.4 --> pm; PR1.2.1 + PR.1.3.1 + PR.1.3.3 --> m: Government of Malaysia formulated a national Roadmap towards Zero Single Use Plastics (2018–2030) aimed at addressing plastic waste in an integrated and sustainable manner. [2] Promoted Recycling bank at 1095 school and 1082 kindergarten; drive through program with 185 locations; §Rs Exhibition, REcycling club …
					PR.1.3.1 Higher political priority for food waste issues	m	PR.1.4.1 Formulation of food waste avoidance targets and implementation of measures	pm	PR.1.5.2 Food waste is reduced to a minimum	nm
					PR.1.3.2 Few disposables are banned or permitted exceptionnally	pm	PR.1.4.2 All disposables are banned or permitted exceptionnally	nm	PR.1.5.3 CE reduces negative impacts of materials and products by avoiding resources or waste	nm
							PR.1.4.3 Prohibited destruction of unsold durable goods	nm	PR.1.5.4 Increase of bans for substances and products	nm
					PR.1.3.3 Emerging initiatives to educate the population regarding closing-loops	m			PR.1.5.5 CE provides long use of raw materials in the cycle	nm
							PR.1.4.4 Ensured lifetime-extension of buildings before construction	pm	PR.1.5.6 Full deconstruction of buildings is ensured before their realization	nm
									PR.1.5.7 Consumption decisions based on waste prevention	nm
PR.2	PR.2.1.1 Lack of circular business and usage models	nm	PR.2.2.1 Spare parts of End-of-life (EoL) products are used for repair	m	PR.2.3.1 Increased use of EoL spare parts	pm			PR.2.5.1 Permanent provision of spare parts through digitalization	nm	PR.2.2.1 + PR.2.2.2 + PR.2.3.3 --> m; PR. 2.3.1 + PR:2.3.2 + PR. 2.3.4 + PR. 2.3.5 + PR.2.4.2 + PR.3.1.1 + PR.3.1.2 + PR.3.1.3 + PR.3.2.1 + PR.3.2.2 + PR.3.3.1 +PR.4.2.1 + PR.4.3.1 --> pm: Penang was proposed to establish an innovative Waste Industry Plan to encourage better waste management and a circular economy in the State. Similarly, the State government plans to investigate embedding the ci…
					PR.2.3.2 Small use of professional repair by small part of the population	pm	PR.2.4.1 High use of professional repair by big part of the population	nm
					PR.2.3.3 Minimum one online spare market exists	m	PR.2.4.2 Various online spare markets exist	pm	PR.2.5.2 Spare part markets are an integral part of CE	nm
					PR.2.3.4 Product service systems (sharing and leasing) are offered	pm			PR.2.5.3 Sharing and leasing are an integral part of CE	nm
			PR.2.2.2 Voluntary take-back systems for certain wastes (e.g. pharmaceuticals, batteries) exist	m	PR.2.3.5 Introduction of take-back or deposit systems for certain wastes (e.g. beverage packaging)	pm	PR.2.4.3 Deposit obligation to all single-use beverage packaging and change of deposit contribution	nm	PR.2.5.4 Innovative take-back and collection systems enable reuse and high-quality recycling	nm
							PR.2.4.4 Introduction of deposits on material relevant products (e.g. tablets, smartphones)	nm
PR.3	PR.3.1.1 Companies neglect EoL issues of their products	pm	PR.3.2.1 Pioneer companies are considering EoL issues of their products	pm	PR.3.3.1 Through Eco-design several manufacturers are producing in a more environmental friendly way	pm	PR.3.4.1 Increased use of homogenous easy separable, harmfree and secondary materials; less use of disruptive substances	nm	PR.3.5.1 High use of secondary, recyclable or biobased materials for product manufacture	na
	PR.3.1.2 Innovative composite materials are causing disposal problems due to the negligence of EoL in the product design phase	pm					PR.3.4.2 Recyclability, durability and upgradability is generally considered in product design phase	na	PR.3.5.2 EoL concepts for innovative products prior to market introduction are elaborated to minimize problems at the EoL phase	nm
	PR.3.1.3 Companies neglect recyclability, material saving and substitution of hazardous substances during product design phase	pm	PR.3.2.2 Some companies consider recyclability, material savings and substitution of hazardous substances in product design phase	pm					PR.3.5.3 Product recyclability is one basic condition for product marketing	na
							PR.3.4.3 Increasing life cycle assessment of products	na	PR.3.5.4 Almost all companies consider all life cycle phases	nm
					PR.3.3.2 Pioneer companies set voluntarly a minimum use rates for secondary resources in their products	nm	PR.3.4.4 Legal minimum use rates for recyclates in plastic products: between ≥ 30 % and < 60 %	nm	PR.3.5.5 Legal minimum use rates or recyclates in plastic products: ≥ 60 %	nm
PR.4	PR.4.1.1 Neglection of issues for proper waste disposal and waste avoidance in companies	nm	PR.4.2.1 Pioneer companies consider issues as improving their waste disposal and prevent waste	pm	PR.4.3.1 Evaluation of production processes	pm	PR.4.4.1 Inreased investigation of resource efficiency potentials	na	PR.4.5.1 Waste avoidance and closing loops practice in companies	nm
					PR.4.3.2 Substitution of some hazardous materials with non or less hazardous materials	na	PR.4.4.2 Several companies are substituting hazardous with non-hazardous substances	na	PR.4.5.2 Use of pollutants in CE, if controlled circulation considering thresholds is ensured	nm
PR.5	PR.5.1.1 WG: ≥ 2 kg/cap + d		PR.5.2.1 WG: ≥ 1,5 < 2 kg/cap + d	m	PR.5.3.1 WG: ≥ 1 < 1,5 kg/cap + d		PR.5.4.1 WG: ≥ 0,5 < 1 kg/cap + d		PR.5.5.1 WG: < 0,5 kg/cap + d		PR.5.2.1 --> m: 1,000,000 tonnes/year - 1.52 kg/capita/day (national average = 1.21 kg/capita/day) [2]
PR.6	PR.6.1.1 ZWI: ≤ 0,05		PR.6.2.1 ZWI: > 0,05 ≤ 0,15	m	PR.6.3.1 ZWI: > 0,15 ≤ 0,4		PR.6.4.1 ZWI: > 0,4 ≤ 0,9		PR.6.5.1 ZWI: ≥ 0,9		PR.6.2.1 --> m; Zero waste index of low - between 0.06-0.10 [15]
m	fully met
pm	partially met
nm	not met
na	not available

## Sheet: References
Ref. No	Description
1	UNRCD (2017). Country Chapter State of 3Rs in Asia and the Pacific.
2	ESCAP (2020). Closing the loop on plastic pollution in Kuala Lumpur, Malaysia. Available online: https://www.unescap.org/sites/default/d8files/event-documents/KL%20Baseline%20Report-English.pdf
3	SWCORP. Intrgrated solid waste management: Challenge and future.
4	Ghasimi et al. (2010). Municipal Solid Waste at Taman Beringin Transfer Station in Malaysia.
5	International Trade Administration (2022). Malaysia Waste Management Solutions. Available online: https://www.trade.gov/market-intelligence/malaysia-waste-management-solutions#:~:text=According%20to%20the%20National%20Solid,is%20done%20to%20reduce%20waste.
6	Malakahmad, A., et al (2017). Assessment of carbon footprint emissions and environmental concerns of solid waste treatment and disposal techniques; case study of Malaysia.
7	Taib, M., et al. (2017). Development of Waste-to-Energy Plant in Kuala Lumpur.
8	Samsudin, M., et al (2013). Municipal Solid Waste Management in Malaysia: Current Practices, Challenges and Prospects
9	Yik Fu Lim, Yi Jing Chan, Yousif Abdalla Abakr, Vasanthi Sethu, Anurita Selvarajoo, Ajit Singh, Junyan Lee, Milton Gareth, Review of biowastes to energy in Malaysia: Current technology, scalability and socioeconomic analysis, Cleaner Engineering and Technology, Volume 4, 2021, 100257, ISSN 2666-7908, https://doi.org/10.1016/j.clet.2021.100257.
10	Yong, Z.J.; Bashir, M.J.K.; Ng, C.A.; Sethupathi, S.; Lim, J.W.; Show, P.L. Sustainable Waste-to-Energy Development in Malaysia: Appraisal of Environmental, Financial, and Public Issues Related with Energy Recovery from Municipal Solid Waste. Processes 2019, 7, 676. https://doi.org/10.3390/pr7100676
11	MHIA Rahim et al (2017). Construction waste generation in Malaysia construction industry: illegal dumping activities. IOP Conf. Ser.: Mater. Sci. Eng. 271 012040
12	BFOCUS (2023). Put more focus on reducing, reusing plastic instead of Recycling. Available online: https://www.bernama.com/en/b_focus/v2/news.php?id=2183991#:~:text=Overall%20trash%20generated%20in%20Kuala,all%20waste%20was%2033.16%20percent.
12	Cheng, K.M.; Tan, J.Y.; Wong, S.Y.; Koo, A.C.; Amir Sharji, E. A Review of Future Household Waste Management for Sustainable Environment in Malaysian Cities. Sustainability 2022, 14, 6517. https://doi.org/10.3390/su14116517
13	Circular Economy Club (2023). HENG HIAP’S PLASHAUS CLOSING THE LOOP & ADVANCING PLASTIC RECYCLING IN MALAYSIA. Available online: https://www.circulareconomyclub.com/solutions/heng-hiaps-plashaus-closing-the-loop-advancing-plastic-recycling-in-malaysia/
14	Holland Circular Hotspot (2021). Circular Economy Opportunity in Malaysia. Available online: https://www.rvo.nl/sites/default/files/2022/03/Malaysia%20Booster%20Programme.pdf
15	Zaman, A., Swapan, M. Performance evaluation and benchmarking of global waste management systems, Resources, Conservation and Recycling, Volume 114, 2016, Pages 32-41, ISSN 0921-3449, https://doi.org/10.1016/j.resconrec.2016.06.020.
