# Supplementary material
Source: MDPI journal article supplement (https://www.mdpi.com/2813-0391/2/1/6)
Supplement: s1 [file s1 › WMS-DSC_Tool_2023_Phnom Penh.xlsx]

## Sheet: Results Overview
Overview of the results for the assessment of City, Country regarding								Overview of the results for the assessment of City, Country regarding
Governance, Sector and Market								Collection and Transport, Waste Disposal, Energy Recovery, Waste Recycling, Prevention and Reuse
		Stage 1	Stage 2	Stage 3	Stage 4	Stage 5				Stage 1	Stage 2	Stage 3	Stage 4	Stage 5
Governance	G.1 Duties and targets							Collection and transport	CT.1 Waste collection
	G.2 Laws, Regulations and Agreements								CT.2 Service provider
	G.3 Nomenclature								CT.3 Collection rates
	G.4 National level WM								CT.4 Separate collection
	G.5 Regional level WM								CT.5 Collection of recyclables
	G.6 Municipal level WM								CT.6 Waste transport
	G.7 Stakeholder cooperation								CT.7 Transfer stations
	G.8 Control mechanisms								CT.8 Collection of hazardous wastes
	G.9 Authorization and public participation							Waste disposal	WD.1 Waste disposal
	G.10 Quality standards and threshold values								WD.2 Operational measures
	G.11 Data collection, reporting and evaluation								WD.3 Leachate water management
	G.12 Education								WD.4 Landfill gas management
	G.13 Research								WD.5 Other means of disposal
	G.14 Awareness building							Energy recovery	ER.1 Thermal disposal and energy recovery
	G.15 Occupational health and safety								ER.2 Incineration plants
	G.16 Environmental protection								ER.3 Energy and raw material recovery
Sector and Market	SM.1 Sector development							Waste recycling	WR.1 Waste recycling
	SM.2 Jobs								WR.2 Composting
	SM.3 Informal sector								WR.3 Fermentation
	SM.4 WM system structure and organization								WR.4 Sorting and recycling plants
	SM.5 Financial funding								WR.5 Refuse derived fuel
	SM.6 Enterprises								WR.6 Recycling of construction and demolition waste
	SM.7 Recycling market								WR.7 Recycling rates
									WR.8 Diversion rate and Circular material use rate
								Prevention and reuse	PR.1 Prevention
									PR.2 Circular business and usage models
									PR.3 Product design
									PR.4 Process optimization and operational disposal strategies
									PR.5 Waste generation
									PR.6 Zero-waste index
								m	Subcomponent is met
								pm	Subcomponent is partly met
									Subcomponent is not met or data is not available

## Sheet: Collection and Transport
	Stage 1		Stage 2		Stage 3		Stage 4		Stage 5		Rationale / Source
Collection and transport (CT.1 - CT.8)
CT.1	CT.1.1.1 Lack of systematic collection; limited collection	pm	CT.1.2.1 Collection is systematic, but inefficient	pm	CT.1.3.1 Efficient collection through optimizing measures and concepts	pm	CT.1.4.1 Underground systems in public spaces	nm	CT.1.5.1 Waste bins have no negative effect on landscape	nm	CT.1.1.1; CT.1.1.2; CT.1.1.3; CT.1.2.1 CT.1.3.1--> pm CT.1.2.2; CT1.2.4 --> m Service quality is still low and lacks sufficient hygiene. The collection frequency and schedule are also inadequate and affect collection time. Awareness among citizens of waste management and public hygiene tends to be low. As a result, due to the manner in which wastes are discharged at the designated areas (improper…
	CT.1.1.2 Lack of uniform collection bins	pm	CT.1.2.2 Use of uniform aboveground systems	m	CT.1.3.2 Use of new bin systems (e.g. waste locks)	nm	CT.1.4.2 Waste bins with fill level sensors	nm	CT.1.5.2 Avoid of container overfilling (smart bins)	nm
			CT.1.2.3 Collection points are within 200m distance	pm	CT.1.3.3 Service provision of cleaning up bins	nm	CT.1.4.3 Introduction of digitalization measures	nm	CT.1.5.3 Smart waste container separation	nm
	CT.1.1.3 Missing of basic principles of urban hygiene, major littering exists	pm	CT.1.2.4 Urban hygiene principles are partially met, but littering in public spaces remains a problem	m					CT.1.5.4 Full maintainance of urban hygiene principles and no littering in public spaces	nm
CT.2	CT.2.1.1 Collection mostly by waste pickers	nm	CT.2.2.1 Collection mostly by formal sector	pm	CT.2.3.1 Collection mostly by formal or organized informal sector	pm			CT.2.5.1 Waste collection exclusively by formal sector	nm	CT.2.2.1 + CT.2.3.1 --> pm Waste collection is mainly operated by contracted company from the formal sector. A private operator company, CINTRI Cambodia Co. Ltd is currently responsible for collection and transportation of the waste generated in the city, and has gradually expanded its geographical coverage over the years. [1]
CT.3	CT.3.1.1 Collection rate (CR): urban ≤ 50% OR no data	nm	CT.3.2.1 CR: urban > 50 and ≤ 70%	nm	CT.3.3.1 CR: urban > 70 and ≤ 80%	nm	CT.3.4.1 CR: urban > 80 and ≤ 95%	m	CT.3.5.1 CR: urban > 95% and ≤ 100%	nm	CT.3.4.1 --> m; Waste collection rate of the city was about 83.3% with 839,500 tons of waste going to Dangkor Landfill in 2015< where Rural rate is not available. [3]; The municipality of Phnom Penh achieved a 92% collection efficiency [11]
	rural ≤ 30% OR no data	na	rural > 30 and ≤ 50%	na	rural > 50 and ≤ 80%	na	rural > 80 and ≤ 95%	na	rural > 95% and ≤ 100%	na
CT.4	CT.4.1.1 Collective collection of residual waste	pm	CT.4.2.1 First forms of separation at source collection (2 fractions)	pm	CT.4.3.1 Mandatory waste collection for households and businesses (>3 fractions)	nm	CT.4.4.1 Reduction of illegal collection (e.g. electronics)	nm	CT.4.5.1 All recyclables are collected separately	nm	CT.4.1.1 ; CT4.2.1; --> pm. There is a promotion of waste separation at source. However, Waste segregation is mostly non-existent in the city. Although waste categorisation bins are distributed in some public spaces, people are not aware of their use and are not using them in the right way. [1] Currently, there more than 3,000 informal waste collectors roam the streets of Phnom Penh gathering rec…
	CT.4.1.2 Recyclables solely collected by waste pickers	m	CT.4.2.2 Recyclables collected by (in)formal sector	pm	CT.4.3.2 Set up of recycling centers	pm
					CT.4.3.3 Rate of incorrect sorting > 30%	na	CT.4.4.2 Rate of incorrect sorting > 10 to ≤ 30%	na	CT.4.5.2 Rate of incorrect sorting ≤ 10%	na
			CT.4.2.3 Separate collection of hospital waste	pm	CT.4.3.4 Separate collection of: electrical, construction, demolition, agricultural and forestry waste	pm
CT.5	CT.5.1.1 CR are missing, only estimations are available or data is not publicly available	m	CT.5.2.1 Recyclables CR:		CT.5.3.1 Recyclables CR:		CT.5.4.1 Recyclables CR:		CT.5.5.1 Recyclables CR:		CT.5.1.1 --> m. There is no data available for the collection rate on specific waste stream
			Metals: ≤ 50%	na	Metals: > 50 and ≤ 70%	na	Metals: > 70 and ≤ 90%	na	Metals: > 90%	na
			Paper: ≤ 30%	na	Paper: > 30 and ≤ 70%	na	Paper: > 70 and ≤ 90%	na	Paper: > 90%	na
			Glass: ≤ 30%	na	Glass: > 30 and ≤ 70%	na	Glass: > 70 and ≤ 90%	na	Glass: > 90%	na
			Organics: ≤ 30%	na	Organics: > 30 and ≤ 70%	na	Organics: > 70 and ≤ 90%	na	Organics: > 90%	na
			Plastics : ≤ 10%	na	Plastics: > 10 and ≤ 50%	na	Plastics: > 50 and ≤ 90%	na	Plastics: >90%	na
			Textiles: ≤ 10%	na	Textiles: > 10 and ≤ 50%	na	Textiles: > 50 and ≤ 90%	na	Textiles: >90%	na
CT.6	CT.6.1.1 Formal: Only use of simple vehicles	pm	CT.6.2.1 Formal: Mostly use of large fleets and automation	pm	CT.6.3.1 Formal: Waste firms improve vehicle fleets (incl. compactors, lifters).	pm	CT.6.4.1 Use vehicles depending on waste type	nm	CT.6.5.1 Higly engineered and fully automated vehicles	nm	CT.6.1.1; CT.6.1.1.2; CT.6.1.3 --> There is a mixture of different waste collection trucks used in the formal sectors. CT.6.1.2; CT.6.1.3 --> pm; Informal sector uses small vehicles and carts for transport recycable waste [1;11]
	CT.6.1.2 Informal: Only use of pack animals, handcarts, etc.	pm	CT.6.2.2 Informal: Mostly use of small or modified vehicles	pm	CT.6.3.2 Informal: Mostly use of modernized small trucks	na	See WM 3.4.1
CT.7	CT.7.1.1 Direct transport of waste to landfills or dumps	m	CT.7.2.1 Introduction of transfer stations (TS)	pm	CT.7.3.1 TS increase collection efficiency	nm			CT.7.5.1 All existing TS are state of the art	nm	CT.7.1.1 --> m; CT.7.1.2 --> pm; CT.7.2.1 --> pm. At the current state, there is a transfer station in Dangkor district, the new transfer station will be created in Boeung Ta Mok lake area; which the Dangkor facility would eventually be repurposed from a landfill to a transfer station. [5]
	CT.7.1.2 Roads used as transfer areas for waste	pm	CT.7.2.2 Simple TS are unrestricted accessible to public	nm	CT.7.3.2 Advanced TS with restricted access to public.	nm
CT.8	CT.8.1.1 Lack of separate collection of hazardous waste (HW) from households	nm	CT.8.2.1 Small HW quantities from households are collected separatly	pm	CT.8.3.1 Disposal of small quantities of HW is free of charge	pm	CT.8.4.1 Full collection of HW flows	nm	CT.8.5.1 HW quantities are reduced to a minimum	nm	CT.8.3.2 --> m. In Phnom Penh and Kandal Province, the private company Sarom Trading collects, transports and disposes of industrial waste. The company has its own disposal sites. However, specific data on industrial waste generation, or collection and disposal at Sarom’s industrial landfill is not available [3;4] CT.8.2.1 + CT.8.3.1 --> pm: There are electronic waste bins sited in petrol station…
	CT.8.1.2 Lack of separate collection of industrial HW	nm			CT.8.3.2 Industrial HW is collected almost separately	m
m	fully met
pm	partially met
nm	not met
na	not available

## Sheet: Waste Disposal
	Stage 1		Stage 2		Stage 3		Stage 4		Stage 5		Rationale / Source
Waste disposal (WD.1 - WD.5)
WD.1	WD.1.1.1 Lack of targeted and centralized waste disposal	nm	WD.1.2.1 Targeted and centralized waste disposal in minimum controlled landfills	pm	WD.1.3.1 Introduction of landfill classes	nm	WD.1.4.1 Mineral waste is predominantly landfilled	nm	WD.1.5.1 Waste landfilling gets less important	nm	WD.1.1.2; WD.1.1.3; WD.1.1.4; WD.1.2.1; WD.1.2.2; WD1.2.3 -> pm Most of Cambodia’s landfill sites are open dumps without any specific management system. [4] Most households burn, bury or dump their waste in their land pots and open spaces in the community. This is illegal dumping, which has been prohibited by regulations and city orders. [2] Dangkor Landfill Site is where most local municipalitie…
	WD.1.1.2 Disposal in open dumps, uncontrolled landfills, roads etc.	pm	WD.1.2.2 Open burning and dumping is illegal, but still practiced	pm	WD.1.3.2 Non-hazardous and hazardous waste are no longer disposed together	nm	WD.1.4.2 Recyclables are rarely landfilled	nm	WD.1.5.2 Small quantities of waste are landfilled	nm
	WD.1.1.3 Open burning for eliminiation and energy recovery	pm			WD.1.3.3 Liquid waste is no longer disposed in landfills	nm	WD.1.4.3 After-use of landfills gets more relevant	nm	WD.1.5.3 Reuse of closed landfill areas for other purposes	nm
					WD.1.3.4 Conversion of (in)active landfills to sanitary standard.	nm	WD.1.4.4 Waste is disposed exclusively on sanitary landfills	nm	WD.1.5.4 Importance of rehabilitation of old landfills	nm
							WD.1.4.5 Safe disposal of disaster waste on approved sites	nm	WD.1.5.5 Full avoidance of illegal dumping	nm
	WD.1.1.4 Open dump and controlled dump predominate	pm	WD.1.2.3 Controlled or engineered landfill predominate	pm			WD.1.4.6 Sanitary landfill predominates	nm	WD.1.5.6 All (in)active landfills have sanitary landfill standard	nm
WD.2	WD.2.1.1 Lack of disposal controls (waste registration)	pm	WD.2.2.1 Registration of waste type, etc. before disposal	pm	WD.2.3.1 Registration and compaction of waste are the norm	nm			WD.2.5.1 All existing and new landfills comply with the current state of art	nm	WD.2.1.1; WD.2.1.2; WD.2.1.3; WD.2.1.4; WD.2.2.1; WD.2.2.2; WD.2.2.3; WD.2.2.4; WD.2.2.5 --> pm. Landfills in Cambodia are usually operated as open dumpsites, with the landfills of Phnom Penh, Siem Reap and Sihanoukville being no exemption. Waste dumping is done without compaction, and in combination with steep slopes is a dangerous situation for waste pickers(WB, 2020). Phnom Penh’s final dispos…
	WD.2.1.2. Waste is burned on dumping sites	pm	WD.2.2.2 Waste burning on landfill sites is missing	pm	WD.2.3.2 Systematic pre-treatment of waste is mandatory	nm
	WD.2.1.3 Landfill access controls are lacking or inadequate	pm	WD.2.2.3 Compaction and daily cover of waste	pm	WD.2.3.3 Systematic landfill management is carried out	nm
			WD.2.2.4 Site drawing showing landfill boundary and filling area in place	pm	WD.2.3.4 Realization of measures for (post-)closure management	nm
	WD.2.1.4 Dumping sites are not staffed or only in short times for site checking	pm	WD.2.2.5 Site is staffed during operational hours	pm
WD.3	WD.3.1.1 Leachate infiltrates soil or evaporates	nm	WD.3.2.1 Available leachate collection	m	WD.3.3.1 Leachate collection and treatment in all active landfills	nm	WD.3.4.1 Compliance of strict limits at water monitoring	nm	WD.3.5.1 Decrease of leachate and toxicity	nm	WD.3.1.2; WD.3.2.1; --> m; WD.3.2.2 --> pm; WD.4.1.1. --> pm The landfill has recently faced many problems, such as groundwater contamination and greenhouse gas effects from a high amount of food waste. (Chinda T. et al., 2022) The leachate from the landfill site is now collected to an evaporation pond for concentration, but no treatment process is currently employed. Due to the geological featur…
	WD.3.1.2 Lack of surface and groundwaster monitoring	m	WD.3.2.2 Recirculation of leachate in the landfill body	pm
			WD.3.2.3 Surface and groundwater is monitored	nm
WD.4	WD.4.1.1 Landfill gas is released into the atmosphere	m	WD.4.2.1 Implementation of passive collection or flaring of landfill gas	nm	WD.4.3.1 Landfill gas collection for energy recovery and gas monitoring	nm	WD.4.4.1 Compliance of strict limits for gas monitoring	nm	WD.4.5.1 Controlled flaring of landfill gas only in emergencies and when it is unprofitable (small gas quantities)	nm
WD.5	WD.5.1.1 Waste burning or dumping on high seas and coastal waters	na			WD.5.3.1 Waste burning or dumping on high seas and coastal waters is prohibited, but still takes place	m			WD.5.5.1 Avoidance of waste burning or dumping on high seas and coastal waters	nm	WD.5.3.1 --> m: GoGreen Cambodia regularly organises city clean-ups to promote environmental awareness. Cambodian Education and Waste Management Organisation, an NGO, organises the clean-up of Siem Reap River and Stung Sangke River in Battambang and collects approximately 500 kg/month of waste (including from other activities, such as buying from informal collectors), which means that dumping in …
m	fully met
pm	partially met
nm	not met
na	not available

## Sheet: Energy Recovery
	Stage 1		Stage 2		Stage 3		Stage 4		Stage 5		Rationale / Source
Energy Recovery (ER.1 - ER.3)
ER.1	ER.1.1.1 Controlled energy recovery or thermal disposal is missing	pm	Availability of organizational criteria:		ER.1.3.1 ER is used to treat large waste quantities of the city inside or outside the country	nm	ER.1.4.1 ER is essential treatment alternative	nm	ER.1.5.1 Incinerated waste amount decreases due to higher recycling rates	nm	ER.1.1.1 + ER.1.1.2 + Availability of organizational and technical --> pm; currently there are different incinerators models that use for treating medical waste. The basic organizational and technical criteria are still not fully meet the minimum requirement and additional supports are needed. [1]
			I) controlled landfills	pm	ER.1.3.2 Agreements regulate waste delivery, energy sales and pricing	nm
			II) qualified staff	pm	ER.1.3.3 At least 150.000 tons/y of suitable waste are available for incineration	nm	ER.1.4.2 Lower heating value has to be at least 11 MJ/kg	nm
			III) systematic collection	pm
			IV) Sorting at source is implemented	pm
			V) Basic WM laws and rules are developed	m
			VI) Incineration plants are positioned in political plans	m
			VII) Political and social will is given	pm
			VIII) Total costs for the plant are secured	pm
			IX) Public or private actors are experienced in managing incineration plants efficiently	pm
			X) Spare parts can be purchased locally or imported	pm
			Availibility of technical criteria:
			I) stable supply of combustible waste	pm
			II) lower heating value at least 7 MJ/kg
			III) Bottom and fly ash can be treated safely	pm
	ER.1.1.2 Co-incineration of waste is missing	pm	ER.1.2.3 Co-incineration of specific waste or RDFs in industrial firing plants	na	ER.1.3.4 ER as alternative for landfilling; energy-intensive industries often make use of it	na
ER.2	ER.2.1.1 Waste incinerators are neither operating or planned in the country	m	ER.2.2.1 Incineration plants (incl. flue gas cleaning - FGC) are in planning or construction in the country or simple incineration plants without FGC are in operation with engineered process controls (incl. continous monitoring and recording of operating parameters)	nm	ER.2.3.1 Operation of waste incinerators with FGC	na	ER.2.4.1 High-tech and state of the art processes ensure reliability and safe emission elimination	nm	ER.2.5.1 Automatic and homogenous waste input	nm	ER.2.1.1 --> pm: There is no agenda for building such large scale of incineration or Waste to energy plant in Cambodia at the current stage. However, there is a study for encouragement from GGGI to initiate Waste to Energy in Phnom Penh, which proposed a lower cost alternative from WtE to Waste to Fuel by facilitating investment in Mechnanical and Biological Treatment (MBT) to produce Refuse Deri…
					I) Continuous monitoring of operating parameters and emissions	na	ER.2.4.2 Flue gas controls compliant with applicable environmental standards	nm
					II) Monitoring systems are routinely calibrated	na
					III) Maintenance plans or schedules are in place	na
					IV) Evidence that equipment is well maintained	na
					V) Fire extinguishers available on site	na
ER.3	ER.3.1.1 Raw material and ER through controlled waste incineration is missing	m	ER.3.2.1 Possible recovery of energy through waste incineration	nm	ER.3.3.1 Selling of recovered energy (electrical, thermal, combination)	na			ER.3.5.1 Increased replacing of primary energy resources	nm
					ER.3.3.2 Incineration or RDF plants are located in areas with moderate heat demand and good transport and energy infrastructure exists	na
			ER.3.2.2 Recycling of incineration residues is missing	na	ER.3.3.3 Recovered metals from incineration process are sold; other by-products are treated safely, but recycled rarely	na	ER.3.4.1 Increased recycling and reuse of slags	nm	ER.3.5.2 Almost complete reintroduction of by-products from incineration into the economic cycle	nm
m	fully met
pm	partially met
nm	not met
na	not available

## Sheet: Waste Recycling
	Stage 1		Stage 2		Stage 3		Stage 4		Stage 5		Rationale / Source
Waste recycling (WR.1 - WR.8)
WR.1	WR.1.1.1 Material recycling is rarely done, but open-loop recycling and downcycling predominate	m			WR.1.3.1 Extension of waste treatment by mechanical, biological, etc. treatment options	nm	WR.1.4.1 (Semi-)closed-loop recycling and upcycling increase	nm	WR.1.5.1 (Semi-)closed-loop recycling dominates	nm	WR.1.1.1 + WR.1.1.2 --> m; Limited data are available on recycling in Cambodia since a large quantity of waste collected is exported to Thailand and Vietnam due to the lack of domestic recycling infrastructure. Only a few local NGOs currently process waste by recycling and just two composting facilities are known to operate in Phnom Penh. Due to a lack of financial incentives, private sector init…
							WR.1.4.2 Dialogues between manufactures and recyclers take place to identify and solve recycling problems	nm	WR.1.5.2 Implementation of circular bioeconomy	nm
	WR.1.1.2 Ensured input for recycling plants is lacking	m			WR.1.3.2 Input for recycling plants is partly ensured	nm	WR.1.4.3 Input for recycling plants is fully ensured	nm
WR.2	WR.2.1.1 Organic waste is landfilled or is composted at home or used as animal food	m	WR.2.2.1 Recycling of organics in simple or open composting plants or with mobile aggregates	pm	WR.2.3.1 Introduction of static, closed composting in tunnels / containers with sorting technologies	pm	WR.2.4.1 Integration of (quasi-) dynamic processes in existing plants	nm	WR.2.5.1 Microplastics is removed from compost	nm	WR.2.1.1 -->m; WR.2.2.1 + WR.2.3.1 --> pm; four methods are commonly used in food waste management in Cambodia include composting, anaerobic digestion, use of biodigesters, and landfilling (Chinda T. et al., 2022) (National level) In addition to local NGOs such as CSARO and COMPED2 which accept organic waste from Daeum Kor Market for composting, several private companies are exploring the busines…
			WR.2.2.2 Compost has low compost quality	na	WR.2.3.2 Increased use of compost in agriculture & landscape management	nm	WR.2.4.2 High quality compost, which still contains microplastic	nm	WR.2.5.2 Very high quality and purity level of compost	nm
							WR.2.4.3 Increased use of compost in the private sector	nm
WR.3	WR.3.1.1 No planned or operation fermentation plants	m	WR.3.2.1 Planning or construction of fermentation plants	nm	WR.3.3.1 Fermentation plants recycle organics	nm			WR.3.5.1 Biogas plants are an essential component of CE	nm	Currently, there are over 28000 biodigesters, representing 6% of potential households in Cambodia. There are different types of small-scale biodigesters, including fixed dome, floating drum, low-cost polyethylene tube, balloon, horizontal, earth-pit, and ferro-cement [26]. The most widely used model in Cambodia is the fixed dome digester [15]. It consists of a digester with a fixed non-moveable g…
					WR.3.3.2 Separation of impurities for energetical use of biogas (e.g. in combined heat and power plants)	nm	WR.3.4.1 Introduction of CO2-separation stage at plants	nm
							WR.3.4.2 Feeding of biomethan into the natural gas grid	nm
					WR.3.3.3 Fermentation residues are used as fertilizers	nm	WR.3.4.3 Very high quality of digestates	nm	WR.3.5.2 Mostly full removal of microplastics from digestates	nm
WR.4	WR.4.1.1 Manual sorting of recyclables	pm	WR.4.2.1 Partially automated sorting of recyclables (incl. shredding and separation units)	pm	WR.4.3.1 Increase of sorting efficiencies through mechanical separation, screening aggregates	pm	WR.4.4.1 Generation of high-quality fractions through modern sorting facilities	nm	WR.4.5.1 Increasingly digitalized recycling technologies	nm	WR.4.1.1. + WR.4.1.2 + WR.4.2.1 + WR.4.3.1 --> Limited data are available on recycling in Cambodia since a large quantity of waste collected is exported to Thailand and Vietnam due to the lack of domestic recycling infrastructure. Only a few local NGOs currently process waste by recycling and just two composting facilities are known to operate in Phnom Penh. Due to a lack of financial incentives,…
	WR.4.1.2 Inefficient recovery of valuable materials from electronic waste	pm	WR.4.2.2 Recovery of metals and RDFs in mechanical-biological plants	na	WR.4.3.2 Generation of high quality mono-fractions	na			WR.4.5.2 Increasing use of digitalization measures to rise recyclability of products	nm
					WR.4.3.3 Use of stabilate processes to separate metals and RDFs	nm	WR.4.4.2 Production of methanol or synthesis gas from raw material plastic recycling	nm
									WR.4.5.3 Safe recycling of waste containing harmful substances	nm
WR.5	WR.5.1.1 Lack of RDFs recovery from waste	m	WR.5.2.1 Start of RDF recovery from waste treatment plants	pm	WR.5.3.1 Increasing recovery of RDFs from waste	nm			WR.5.5.1 RDF is decreasing due higher closed loop recycling	nm	WR.5.1.1 --> m; + WR.5.2.1 --> pm: there is a study from GGGI to initiate Waste to Energy in Phnom Penh, which proposed a lower cost alternative from WtE to Waste to Fuel by facilitating investment in Mechnanical and Biological Treatment (MBT) to produce Refuse Derived Fuel. [8] However, there is no other RDFs recovery from waste yet.
WR.6	WR.6.1.1 Only conventional demolition of buildings	m	WR.6.2.1 Mostly conventional demolition of buildings	nm	WR.6.3.1 Semi-selective demolition occurs predominantly	nm	WR.6.4.1 Predomination of selective demolition	nm	WR.6.5.1 Only selective demolition occurs	nm	WR.6.1.1 + WR.6.1.2 + WR.6.1.3 --> m; WR.6.2.3 -->pm: Sub-decree 113 (Urban Solid Waste Management) stipulates the responsibilities of the generators and contractors of C&D waste for proper storage, collection, transportation and final disposal; and allows the generator to dispose of the generated C&D waste at the final landfill site either by itself or via contractor services. However, in practi…
	WR.6.1.2 Depollution is done rarely	m	WR.6.2.2 More frequent de-pollution	nm			WR.6.4.2 Depollution is usual practice in demolition	nm
	WR.6.1.3 C&D waste disposal on landfills/dumps predominates	m	WR.6.2.3 Rare use of C&D material as filler or surface excavations	pm	WR.6.3.2 Increased use of C&D materials as filler or for landfill construction	nm	WR.6.4.3 Increased high quality recycled construction material	nm	WR.6.5.2 Almost complete recycling of C&D waste, little is landfilled	nm
					WR.6.3.3 Emerging of recycling routes for C&D materials (road construction)	nm	WR.6.4.4 Thermal treatment or landfilling of non-recyclable construction materials	nm	WR.6.5.3 Prohibition of non-recyclable materials for construction	nm
							WR.6.4.5 Use of robotics for efficient sorting	nm
WR.7	WR.7.1.1 Precise recycling rate numbers are missing	m	WR.7.2.1 Recycling rates:		WR.7.3.1 Recycling rates:		WR.7.4.1 Recycling rates:		WR.7.5.1 Recycling rates:		WR.7.1.1 --> m: Precise recycling rate for specific waste stream are missing. According to UNEP the overall is less than 50%.
			Metals: ≤ 40 %	na	Metals: > 40 and ≤ 70 %	na	Metals: > 70 and ≤ 90 %	na	Metals: > 90 %	na
			Paper: ≤ 40 %	na	Paper: > 40 and ≤ 70 %	na	Paper: > 70 and ≤ 90 %	na	Paper: > 90 %	na
			Glass: ≤ 40 %	na	Glass: > 40 and ≤ 70 %	na	Glass: > 70 and ≤ 90 %	na	Glass: > 90 %	na
			Composites: ≤ 20 %	na	Composites: > 20 and ≤ 60 %	na	Composites: > 60 and ≤ 90 %	na	Composites: > 90 %	na
			Plastics: ≤ 20 %	na	Plastics: > 20 and ≤ 60 %	na	Plastics: > 60 and ≤ 90 %	na	Plastics: > 90 %	na
			WR.7.2.2 Recycling rates:		WR.7.3.2 Recycling rates:		WR.7.4.2 Recycling rates:		WR.7.5.2 Recycling rates:
			E-Waste: > 10 and ≤ 40 %	na	E-Waste: > 40 and ≤ 70 %	na	E-Waste: > 70 and ≤ 90 %	na	E-Waste: > 90 %	na
			C&D waste: > 10 and ≤ 40 %	na	C&D waste: > 40 and ≤ 70 %	na	C&D waste: > 70 and ≤ 90 %	na	C&D waste: > 90 %	na
WR.8	WR.8.1.1 CMUR: ≤ 1 % OR no data	m	WR.8.2.1 CMUR: > 1 % ≤ 10 %	nm	WR.8.3.1 CMUR: > 10 % ≤ 30 %	nm	WR.8.4.1 CMUR: > 30 % ≤ 70 %	nm	WR.8.5.1 CMUR: > 70 %	nm	N/A
	WR.8.1.2 DR: ≤ 0,1 OR no data	m	WR.8.2.2 DR: > 0,1 ≤ 0,2	nm	WR.8.3.2 DR: > 0,2 ≤ 0,4	nm	WR.8.4.2 DR: > 0,4 ≤ 0,7	nm	WR.8.5.2 DR: > 0,7 ≤ 1,0	nm
m	fully met
pm	partially met
nm	not met
na	not available

## Sheet: Prevention and Reuse
	Stage 1		Stage 2		Stage 3		Stage 4		Stage 5		Rationale / Source
Prevention and reuse (PR.1 - PR.6)
PR.1	PR.1.1.1 Prevention is motivated by poverty	pm	PR.1.2.1 Prevention is motivated by lack of resources	pm					PR.1.5.1 Decoupling of GDP and waste generation	nm	PR.1.1.1 + PR.1.2.1 + PR.1.3.1 + PR.1.3.2 + Pr.1.3.3 --> pm: Promote decentralised use of food waste (composting and biogas systems) targeting private sectors, particularly large-scale generators such as the food service industry and hospitality industry. A campaign to encourage voluntary actions and training programmes for skills development can be implemented [1]. The MoE introduced Sub-Decree …
					PR.1.3.1 Higher political priority for food waste issues	pm	PR.1.4.1 Formulation of food waste avoidance targets and implementation of measures	nm	PR.1.5.2 Food waste is reduced to a minimum	nm
					PR.1.3.2 Few disposables are banned or permitted exceptionnally	pm	PR.1.4.2 All disposables are banned or permitted exceptionnally	nm	PR.1.5.3 CE reduces negative impacts of materials and products by avoiding resources or waste	nm
							PR.1.4.3 Prohibited destruction of unsold durable goods	nm	PR.1.5.4 Increase of bans for substances and products	nm
					PR.1.3.3 Emerging initiatives to educate the population regarding closing-loops	pm			PR.1.5.5 CE provides long use of raw materials in the cycle	nm
							PR.1.4.4 Ensured lifetime-extension of buildings before construction	nm	PR.1.5.6 Full deconstruction of buildings is ensured before their realization	nm
									PR.1.5.7 Consumption decisions based on waste prevention	nm
PR.2	PR.2.1.1 Lack of circular business and usage models	pm	PR.2.2.1 Spare parts of End-of-life (EoL) products are used for repair	pm	PR.2.3.1 Increased use of EoL spare parts	pm			PR.2.5.1 Permanent provision of spare parts through digitalization	nm	PR.2.1.1 --> m; PR.2.2.1 + PR.2.2.2 + PR.2.3.1 + PR.2.3.2 + PR.2.3.4 --> pm: Cambodia is in a strong position to make significant long-term changes and move closer towards achieving sustainable development through a CE, building on robust economic growth and its increasing, young consumer base. The country developed CE Strategy and Action Plan identifies entry points for critical actions and deve…
					PR.2.3.2 Small use of professional repair by small part of the population	pm	PR.2.4.1 High use of professional repair by big part of the population	nm
					PR.2.3.3 Minimum one online spare market exists	pm	PR.2.4.2 Various online spare markets exist	nm	PR.2.5.2 Spare part markets are an integral part of CE	nm
					PR.2.3.4 Product service systems (sharing and leasing) are offered	pm			PR.2.5.3 Sharing and leasing are an integral part of CE	nm
			PR.2.2.2 Voluntary take-back systems for certain wastes (e.g. pharmaceuticals, batteries) exist	pm	PR.2.3.5 Introduction of take-back or deposit systems for certain wastes (e.g. beverage packaging)	nm	PR.2.4.3 Deposit obligation to all single-use beverage packaging and change of deposit contribution	nm	PR.2.5.4 Innovative take-back and collection systems enable reuse and high-quality recycling	nm
							PR.2.4.4 Introduction of deposits on material relevant products (e.g. tablets, smartphones)	nm
PR.3	PR.3.1.1 Companies neglect EoL issues of their products	pm	PR.3.2.1 Pioneer companies are considering EoL issues of their products	pm	PR.3.3.1 Through Eco-design several manufacturers are producing in a more environmental friendly way	nm	PR.3.4.1 Increased use of homogenous easy separable, harmfree and secondary materials; less use of disruptive substances	nm	PR.3.5.1 High use of secondary, recyclable or biobased materials for product manufacture	nm
	PR.3.1.2 Innovative composite materials are causing disposal problems due to the negligence of EoL in the product design phase	pm					PR.3.4.2 Recyclability, durability and upgradability is generally considered in product design phase	nm	PR.3.5.2 EoL concepts for innovative products prior to market introduction are elaborated to minimize problems at the EoL phase	nm
	PR.3.1.3 Companies neglect recyclability, material saving and substitution of hazardous substances during product design phase	pm	PR.3.2.2 Some companies consider recyclability, material savings and substitution of hazardous substances in product design phase	pm					PR.3.5.3 Product recyclability is one basic condition for product marketing	nm
							PR.3.4.3 Increasing life cycle assessment of products	nm	PR.3.5.4 Almost all companies consider all life cycle phases	nm
					PR.3.3.2 Pioneer companies set voluntarly a minimum use rates for secondary resources in their products	na	PR.3.4.4 Legal minimum use rates for recyclates in plastic products: between ≥ 30 % and < 60 %	nm	PR.3.5.5 Legal minimum use rates or recyclates in plastic products: ≥ 60 %	nm
PR.4	PR.4.1.1 Neglection of issues for proper waste disposal and waste avoidance in companies	pm	PR.4.2.1 Pioneer companies consider issues as improving their waste disposal and prevent waste	pm	PR.4.3.1 Evaluation of production processes	na	PR.4.4.1 Inreased investigation of resource efficiency potentials	nm	PR.4.5.1 Waste avoidance and closing loops practice in companies	nm
					PR.4.3.2 Substitution of some hazardous materials with non or less hazardous materials	na	PR.4.4.2 Several companies are substituting hazardous with non-hazardous substances	nm	PR.4.5.2 Use of pollutants in CE, if controlled circulation considering thresholds is ensured	nm
PR.5	PR.5.1.1 WG: ≥ 2 kg/cap + d	nm	PR.5.2.1 WG: ≥ 1,5 < 2 kg/cap + d	nm	PR.5.3.1 WG: ≥ 1 < 1,5 kg/cap + d	na	PR.5.4.1 WG: ≥ 0,5 < 1 kg/cap + d	m	PR.5.5.1 WG: < 0,5 kg/cap + d	nm	PR.5.4.1 --> m: In 2013, the average municipal solid waste in Phnom Penh per day was about 1,550 tonnes, or about 0.91 kg of waste generated per person per day.[10] The MoE estimated that approximately 4.78 million tons of MSW were generated in 2020 with per capita generation at 0.78 kg/day. [11]
PR.6	PR.6.1.1 ZWI: ≤ 0,05	m	PR.6.2.1 ZWI: > 0,05 ≤ 0,15	nm	PR.6.3.1 ZWI: > 0,15 ≤ 0,4	na	PR.6.4.1 ZWI: > 0,4 ≤ 0,9	nm	PR.6.5.1 ZWI: ≥ 0,9	nm	PR.6.1.1 --> m: Cambodia categorized in very low zero waste indicator < 0.05 [15]
m	fully met
pm	partially met
nm	not met
na	not available

## Sheet: References
No	Title			Reference
1	PPCA, IGES, Nexus, UN Environment, CCCA. (2018). Phnom Penh Waste Management Strategy and Action Plan 2018-2035. Phnom Penh, Cambodia.
2	Spoann V. et al.,(2019). Assessment of Public–Private Partnership in Municipal Solid Waste Management in Phnom Penh, Cambodia
3	UNEP & IGES (2018). State of Waste Management in Phnom Pehn, Cambodia
4	GIZ (2019). Partnership Ready Cambodia: Waste management
5	Phnom Penh Post (2021). New permanent landfill site, waste transfer station built. Available online: https://www.phnompenhpost.com/national/new-permanent-landfill-site-waste-transfer-station-built
6	Khmer Times (2023). 7 tonnes of e-waste collected. Available online: https://www.khmertimeskh.com/501238891/7-tonnes-of-e-waste-collected/
7	OECD (2019). Marine Plasrics pollution Cambodia
8	GGGI (2021). KH09 Waste to Energy in Phnom Penh.
9	COMPED (2023). Composting. Available online: https://www.comped-cam.org/compostingone.php
10	Chinda T. et al., (2022). Long-term food waste management in Phnom Penh utilizing a system dynamics modeling approach.
11	Pheakdey DV, Quan NV, Khanh TD, Xuan TD. Challenges and Priorities of Municipal Solid Waste Management in Cambodia. Int J Environ Res Public Health. 2022 Jul 11;19(14):8458. doi: 10.3390/ijerph19148458. PMID: 35886307; PMCID: PMC9322170.
12	Srun, P., Kurisu, K., (2019). Internal and External influential factors on waste disposal behavior in public open spaces in Phnom Penh, Cambodia.
13	GGGI (2020) Large-scale Management of unsegregated municipal solid waste in Phnom Penh: A cost comparison of three options
14	GSSD & NCSD & SIDA & UNDP (2021). Circular Economy Strategy and Action Plan for Kingdom of Cambodia.
15	Zaman, A., Swapan, M. Performance evaluation and benchmarking of global waste management systems, Resources, Conservation and Recycling, Volume 114, 2016, Pages 32-41, ISSN 0921-3449, https://doi.org/10.1016/j.resconrec.2016.06.020.				Publication
