# Supplementary material
Source: MDPI journal article supplement (https://www.mdpi.com/2813-0391/2/1/6)
Supplement: s1 [file s1 › WMS-DSC_Tool_2023_Singapore.xlsx]

## Sheet: Results Overview
	#REF!
	Collection and Transport, Waste Disposal, Energy Recovery, Waste Recycling, Prevention and Reuse
			Stage 1	Stage 2	Stage 3	Stage 4	Stage 5
	Collection and transport	CT.1 Waste collection
		CT.2 Service provider
		CT.3 Collection rates
		CT.4 Separate collection
		CT.5 Collection of recyclables
		CT.6 Waste transport
		CT.7 Transfer stations
		CT.8 Collection of hazardous wastes
			Stage 1	Stage 2	Stage 3	Stage 4	Stage 5
	Waste disposal	WD.1 Waste disposal
		WD.2 Operational measures
		WD.3 Leachate water management
		WD.4 Landfill gas management
		WD.5 Other means of disposal
			Stage 1	Stage 2	Stage 3	Stage 4	Stage 5
	Energy recovery	ER.1 Thermal disposal and energy recovery
		ER.2 Incineration plants
		ER.3 Energy and raw material recovery
			Stage 1	Stage 2	Stage 3	Stage 4	Stage 5
	Waste recycling	WR.1 Waste recycling
		WR.2 Composting
		WR.3 Fermentation
		WR.4 Sorting and recycling plants
		WR.5 Refuse derived fuel
		WR.6 Recycling of construction and demolition waste
		WR.7 Recycling rates
		WR.8 Diversion rate and Circular material use rate
			Stage 1	Stage 2	Stage 3	Stage 4	Stage 5
	Prevention and reuse	PR.1 Prevention
		PR.2 Circular business and usage models
		PR.3 Product design
		PR.4 Process optimization and operational disposal strategies
		PR.5 Waste generation
		PR.6 Zero-waste index
	m	Subcomponent is met
	pm	Subcomponent is partly met
		Subcomponent is not met or data is not available

## Sheet: Collection and Transport
	Stage 1		Stage 2		Stage 3		Stage 4		Stage 5		Rationale / Source
Collection and transport (CT.1 - CT.8)
CT.1	CT.1.1.1 Lack of systematic collection; limited collection	nm	CT.1.2.1 Collection is systematic, but inefficient	nm	CT.1.3.1 Efficient collection through optimizing measures and concepts	m	CT.1.4.1 Underground systems in public spaces	pm	CT.1.5.1 Waste bins have no negative effect on landscape	pm	CT1.2.2 + CT1.2.3 + CT1.3.1 + CT1.3.2 + CT1.3.3 --> m; CT1.4.1 + CT1.4.2 + CT1.5.1 + CT1.5.2 --> pm; because of the several factors: - Singapore waste collection is systematic and well organized with a uniform bin. The regulation on waste littering is established and public cleaning activities fall under the responsibility of the Department of Public Cleanliness since 1st April 2012 and was re-ce…
	CT.1.1.2 Lack of uniform collection bins	nm	CT.1.2.2 Use of uniform aboveground systems	m	CT.1.3.2 Use of new bin systems (e.g. waste locks)	m	CT.1.4.2 Waste bins with fill level sensors	pm	CT.1.5.2 Avoid of container overfilling (smart bins)	pm
			CT.1.2.3 Collection points are within 200m distance	m	CT.1.3.3 Service provision of cleaning up bins	m	CT.1.4.3 Introduction of digitalization measures	m	CT.1.5.3 Smart waste container separation	nm
	CT.1.1.3 Missing of basic principles of urban hygiene, major littering exists	nm	CT.1.2.4 Urban hygiene principles are partially met, but littering in public spaces remains a problem	nm					CT.1.5.4 Full maintainance of urban hygiene principles and no littering in public spaces	m
CT.2	CT.2.1.1 Collection mostly by waste pickers	nm	CT.2.2.1 Collection mostly by formal sector	nm	CT.2.3.1 Collection mostly by formal or organized informal sector	m			CT.2.5.1 Waste collection exclusively by formal sector	pm	CT.2.3.1 --> m; CT.2.5.1 --> pm: -Currently, municipal solid waste is mostly collected by public and partially by orga-nized informal sector. Public waste collectors (PWCs) are appointed by NEA through open tenders to serve domestic and trade premises in Singapore by geographical sec-tors. Currently, three PWCs operate in Singapore namely ALBA W&H Smart city Pte Ltd, SembWaste Pte Ltd and 800 Sup…
CT.3	CT.3.1.1 Collection rate (CR): urban ≤ 50% OR no data	nm	CT.3.2.1 CR: urban > 50 and ≤ 70%	nm	CT.3.3.1 CR: urban > 70 and ≤ 80%	nm	CT.3.4.1 CR: urban > 80 and ≤ 95%	nm	CT.3.5.1 CR: urban > 95% and ≤ 100%	m	CT3.5.1 --> m; Nearly all municipal solid waste (100%) is collected in high-income nations and econ-omies like Singapore, Japan, and Korea [6].
	rural ≤ 30% OR no data	nm	rural > 30 and ≤ 50%	nm	rural > 50 and ≤ 80%	nm	rural > 80 and ≤ 95%	nm	rural > 95% and ≤ 100%	m
CT.4	CT.4.1.1 Collective collection of residual waste	nm	CT.4.2.1 First forms of separation at source collection (2 fractions)	pm	CT.4.3.1 Mandatory waste collection for households and businesses (>3 fractions)	pm	CT.4.4.1 Reduction of illegal collection (e.g. electronics)	na	CT.4.5.1 All recyclables are collected separately	m	CT.4.2.3 + CT4.3.2 + CT.4.3.4 + CT4.5.1 --> m; CT.4.2.1 + CT.4.2.2 + CT4.3.1 --> pm: -Mixed municipal solid waste and recyclable waste such as paper, plastic, metal can are collected separately. The Informal Recycling Sector is still playing an important role in collection of recyclable waste together with government and waste collection initia-tives and campaigns to increase waste separation awa…
	CT.4.1.2 Recyclables solely collected by waste pickers	nm	CT.4.2.2 Recyclables collected by (in)formal sector	pm	CT.4.3.2 Set up of recycling centers	m
					CT.4.3.3 Rate of incorrect sorting > 30%	na	CT.4.4.2 Rate of incorrect sorting > 10 to ≤ 30%	na	CT.4.5.2 Rate of incorrect sorting ≤ 10%	na
			CT.4.2.3 Separate collection of hospital waste	m	CT.4.3.4 Separate collection of: electrical, construction, demolition, agricultural and forestry waste	m
CT.5	CT.5.1.1 CR are missing, only estimations are available or data is not publicly available	m	CT.5.2.1 Recyclables CR:		CT.5.3.1 Recyclables CR:		CT.5.4.1 Recyclables CR:		CT.5.5.1 Recyclables CR:		https://www.nea.gov.sg/our-services/waste-management/waste-statistics-and-overall-recycling
			Metals: ≤ 50%	nm	Metals: > 50 and ≤ 70%	nm	Metals: > 70 and ≤ 90%	nm	Metals: > 90%	m
			Paper: ≤ 30%	nm	Paper: > 30 and ≤ 70%	m	Paper: > 70 and ≤ 90%	nm	Paper: > 90%	nm
			Glass: ≤ 30%	m	Glass: > 30 and ≤ 70%	na	Glass: > 70 and ≤ 90%	nm	Glass: > 90%	nm
			Organics: ≤ 30%	na	Organics: > 30 and ≤ 70%	na	Organics: > 70 and ≤ 90%	nm	Organics: > 90%	nm
			Plastics : ≤ 10%	nm	Plastics: > 10 and ≤ 50%	nm	Plastics: > 50 and ≤ 90%	nm	Plastics: >90%	nm
			Textiles: ≤ 10%	nm	Textiles: > 10 and ≤ 50%	nm	Textiles: > 50 and ≤ 90%	nm	Textiles: >90%	nm
CT.6	CT.6.1.1 Formal: Only use of simple vehicles	nm	CT.6.2.1 Formal: Mostly use of large fleets and automation	nm	CT.6.3.1 Formal: Waste firms improve vehicle fleets (incl. compactors, lifters).	m	CT.6.4.1 Use vehicles depending on waste type	m	CT.6.5.1 Higly engineered and fully automated vehicles	pm	CT.6.3.1 + CT.6.4.1 --> m; CT.6.5.1 --> pm: -The formal collection companies use collection trucks that are contemporary, auto-mated, and equipped with compactors. They also use GPS technology to track collec-tion performance, implement feedback mechanisms, and educate the public about how to keep the city clean. There is different waste trucks for different types of waste and most of the trucks …
	CT.6.1.2 Informal: Only use of pack animals, handcarts, etc.	nm	CT.6.2.2 Informal: Mostly use of small or modified vehicles	na	CT.6.3.2 Informal: Mostly use of modernized small trucks	na	See WM 3.4.1
CT.7	CT.7.1.1 Direct transport of waste to landfills or dumps	nm	CT.7.2.1 Introduction of transfer stations (TS)	nm	CT.7.3.1 TS increase collection efficiency	nm			CT.7.5.1 All existing TS are state of the art	m	CT.7.5.1 --> m; - Non-incinerable waste and ash from waste-to-energy plants are first gathered at the Tuas Marine Transfer Station before being transported to Semakau Landfill (TMTS). It was constructed at the same time as Semakau Landfill and is located near to the Tuas South Incineration Plant. All incoming licensed collection vehicles carrying non-incinerable waste are weighed at the weighbrid…
	CT.7.1.2 Roads used as transfer areas for waste	nm	CT.7.2.2 Simple TS are unrestricted accessible to public	nm	CT.7.3.2 Advanced TS with restricted access to public.	nm
CT.8	CT.8.1.1 Lack of separate collection of hazardous waste (HW) from households	nm	CT.8.2.1 Small HW quantities from households are collected separatly	pm	CT.8.3.1 Disposal of small quantities of HW is free of charge	m	CT.8.4.1 Full collection of HW flows	pm	CT.8.5.1 HW quantities are reduced to a minimum	nm	CT.8.2.1 + CT.8.4.1 --> pm; CT.8.3.1 --> m: - There is a full collection of hazardous waste, however, there is no data available on whether the quantity of hazardous waste is reduced to the minimum. At the household level, it is encouraged to separate hazardous waste like end-of-life batteries and other electronic waste where there are a number of collecting points throughout the cities such as A…
	CT.8.1.2 Lack of separate collection of industrial HW	nm			CT.8.3.2 Industrial HW is collected almost separately	nm
m	fully met
pm	partially met
nm	not met
na	not available

## Sheet: Waste Disposal
	Stage 1		Stage 2		Stage 3		Stage 4		Stage 5		Rationale / Source
Waste disposal (WD.1 - WD.5)
WD.1	WD.1.1.1 Lack of targeted and centralized waste disposal	nm	WD.1.2.1 Targeted and centralized waste disposal in minimum controlled landfills	nm	WD.1.3.1 Introduction of landfill classes	m	WD.1.4.1 Mineral waste is predominantly landfilled	na	WD.1.5.1 Waste landfilling gets less important	m	WD1.3.1 + WD1.3.2 + WD1.3.3 + WD.1.3.4 + WD1.4.1 + WD1.4.2 + WD1.4.3 + WD.1.3.4 + WD.1.4.6 + Wd1.5.1 + WD.1.5.2 + WD 1.5.3 + W.1.5.4 + WD.1.5.5 +WD.1.5.6 + WD.1.5.6 --> m: - Only one offshore sanitary landfill, Semakau Landfill, is in operation in Singapore; it is situated around 8 kilometers to the south of the island. Only non-incinerable waste and ash from the incinerators are accepted at Sema…
	WD.1.1.2 Disposal in open dumps, uncontrolled landfills, roads etc.	nm	WD.1.2.2 Open burning and dumping is illegal, but still practiced	nm	WD.1.3.2 Non-hazardous and hazardous waste are no longer disposed together	m	WD.1.4.2 Recyclables are rarely landfilled	m	WD.1.5.2 Small quantities of waste are landfilled	m
	WD.1.1.3 Open burning for eliminiation and energy recovery	nm			WD.1.3.3 Liquid waste is no longer disposed in landfills	m	WD.1.4.3 After-use of landfills gets more relevant	m	WD.1.5.3 Reuse of closed landfill areas for other purposes	m
					WD.1.3.4 Conversion of (in)active landfills to sanitary standard.	m	WD.1.4.4 Waste is disposed exclusively on sanitary landfills	m	WD.1.5.4 Importance of rehabilitation of old landfills	m
						nm	WD.1.4.5 Safe disposal of disaster waste on approved sites	na	WD.1.5.5 Full avoidance of illegal dumping	m
	WD.1.1.4 Open dump and controlled dump predominate	nm	WD.1.2.3 Controlled or engineered landfill predominate	nm			WD.1.4.6 Sanitary landfill predominates	m	WD.1.5.6 All (in)active landfills have sanitary landfill standard	m
WD.2	WD.2.1.1 Lack of disposal controls (waste registration)	nm	WD.2.2.1 Registration of waste type, etc. before disposal	nm	WD.2.3.1 Registration and compaction of waste are the norm	m			WD.2.5.1 All existing and new landfills comply with the current state of art	m	WD.2.3.1 + WD.2.3.2 + WD.2.3.3 + WD.2.3.4 + WD.2.5.1 --> m: - The management and operation measures at Semakau landfill are organized and well-operated. The waste is registered and weighed prior to disposal. Both the waste statis-tics and the types of discarded material are documented. The burned ash and non-incinerable waste are then dumped into the landfill cell by the dump trucks once they hav…
	WD.2.1.2. Waste is burned on dumping sites	nm	WD.2.2.2 Waste burning on landfill sites is missing	nm	WD.2.3.2 Systematic pre-treatment of waste is mandatory	m
	WD.2.1.3 Landfill access controls are lacking or inadequate	nm	WD.2.2.3 Compaction and daily cover of waste	nm	WD.2.3.3 Systematic landfill management is carried out	m
			WD.2.2.4 Site drawing showing landfill boundary and filling area in place	nm	WD.2.3.4 Realization of measures for (post-)closure management	m
	WD.2.1.4 Dumping sites are not staffed or only in short times for site checking	nm	WD.2.2.5 Site is staffed during operational hours	nm
WD.3	WD.3.1.1 Leachate infiltrates soil or evaporates	nm	WD.3.2.1 Available leachate collection	m	WD.3.3.1 Leachate collection and treatment in all active landfills	m	WD.3.4.1 Compliance of strict limits at water monitoring	m	WD.3.5.1 Decrease of leachate and toxicity	pm	WD.3.2.1 + WD.3.2.3 + WD.3.4.1 --> m; WD.3.5.1 --> pm: The leachate management at Semakau landfill is well structured. A 7km perimeter rock bund encloses part of the sea off Pulau Semakau and Pulau Sakeng to create the space for the landfill. The bund is lined with an impermeable membrane and a layer of marine clay, ensuring that leachate from the refuse is contained in the landfill. Ancil-lary f…
	WD.3.1.2 Lack of surface and groundwaster monitoring	nm	WD.3.2.2 Recirculation of leachate in the landfill body	na
			WD.3.2.3 Surface and groundwater is monitored	m
WD.4	WD.4.1.1 Landfill gas is released into the atmosphere	nm	WD.4.2.1 Implementation of passive collection or flaring of landfill gas	nm	WD.4.3.1 Landfill gas collection for energy recovery and gas monitoring	pm	WD.4.4.1 Compliance of strict limits for gas monitoring	pm	WD.4.5.1 Controlled flaring of landfill gas only in emergencies and when it is unprofitable (small gas quantities)	na	There is no specific information available regarding gas management at Semakau Landfill. However, assessing the current design and management, the landfill gas should be controlled and monitored by landfill management. (further investigation is needed)
WD.5	WD.5.1.1 Waste burning or dumping on high seas and coastal waters	na			WD.5.3.1 Waste burning or dumping on high seas and coastal waters is prohibited, but still takes place	na			WD.5.5.1 Avoidance of waste burning or dumping on high seas and coastal waters	na	There is no data available regarding dumping in coastal areas.
m	fully met
pm	partially met
nm	not met
na	not available

## Sheet: Energy Recovery
	Stage 1		Stage 2		Stage 3		Stage 4		Stage 5		Rationale / Source
Energy Recovery (ER.1 - ER.3)
ER.1	ER.1.1.1 Controlled energy recovery or thermal disposal is missing	nm	Availability of organizational criteria:		ER.1.3.1 ER is used to treat large waste quantities of the city inside or outside the country	m	ER.1.4.1 ER is essential treatment alternative	m	ER.1.5.1 Incinerated waste amount decreases due to higher recycling rates	pm	ER.1.3.1 + ER.1.3.2 + ER.1.3.3 + ER.1.4.1 --> m; ER.1.3.4 + ER.1.5.1 --> pm - As a solution to reduce the volume of waste and extend the lifespan of the existing landfill, Singapore government supported the construction of Singapore’s (and Southeast Asia’s) first incinerator plant as early as 1974. Ulu Pandan Incineration Plant started operations on 30th July 1979. Currently, Singapore's solid wa…
			I) controlled landfills	m	ER.1.3.2 Agreements regulate waste delivery, energy sales and pricing	m
			II) qualified staff	m	ER.1.3.3 At least 150.000 tons/y of suitable waste are available for incineration	m	ER.1.4.2 Lower heating value has to be at least 11 MJ/kg	na
			III) systematic collection	m
			IV) Sorting at source is implemented	m
			V) Basic WM laws and rules are developed	m
			VI) Incineration plants are positioned in political plans	m
			VII) Political and social will is given	m
			VIII) Total costs for the plant are secured	m
			IX) Public or private actors are experienced in managing incineration plants efficiently	m
			X) Spare parts can be purchased locally or imported	m
			Availibility of technical criteria:
			I) stable supply of combustible waste	na
			II) lower heating value at least 7 MJ/kg	na
			III) Bottom and fly ash can be treated safely	pm
	ER.1.1.2 Co-incineration of waste is missing	nm	ER.1.2.3 Co-incineration of specific waste or RDFs in industrial firing plants	na	ER.1.3.4 ER as alternative for landfilling; energy-intensive industries often make use of it	pm
ER.2	ER.2.1.1 Waste incinerators are neither operating or planned in the country	nm	ER.2.2.1 Incineration plants (incl. flue gas cleaning - FGC) are in planning or construction in the country or simple incineration plants without FGC are in operation with engineered process controls (incl. continous monitoring and recording of operating parameters)	m	ER.2.3.1 Operation of waste incinerators with FGC	m	ER.2.4.1 High-tech and state of the art processes ensure reliability and safe emission elimination	m	ER.2.5.1 Automatic and homogenous waste input	m
					I) Continuous monitoring of operating parameters and emissions	m	ER.2.4.2 Flue gas controls compliant with applicable environmental standards	m
					II) Monitoring systems are routinely calibrated	m
					III) Maintenance plans or schedules are in place	m
					IV) Evidence that equipment is well maintained	m
					V) Fire extinguishers available on site	m
ER.3	ER.3.1.1 Raw material and ER through controlled waste incineration is missing	nm	ER.3.2.1 Possible recovery of energy through waste incineration	nm	ER.3.3.1 Selling of recovered energy (electrical, thermal, combination)	pm			ER.3.5.1 Increased replacing of primary energy resources	pm	ER.3.3.2 --> m; ER.3.3.1 + ER.3.4.1 + ER.3.5.1 + ER.3.5.2 --> pm_ -Ferrous scrap metal contained in the ash is recovered and recycled. The ash is sent to the Tuas Marine Transfer Station for disposal at the offshore Semakau Landfill. - In Singapore, there is Public-Private-Partnership (PPP) approach for WtE industry where the government purchases incineration services from Special Purpose Compa-n…
					ER.3.3.2 Incineration or RDF plants are located in areas with moderate heat demand and good transport and energy infrastructure exists	m
			ER.3.2.2 Recycling of incineration residues is missing	nm	ER.3.3.3 Recovered metals from incineration process are sold; other by-products are treated safely, but recycled rarely	na	ER.3.4.1 Increased recycling and reuse of slags	pm	ER.3.5.2 Almost complete reintroduction of by-products from incineration into the economic cycle	pm
m	fully met
pm	partially met
nm	not met
na	not available

## Sheet: Waste Recycling
	Stage 1		Stage 2		Stage 3		Stage 4		Stage 5		Rationale / Source
Waste recycling (WR.1 - WR.8)
WR.1	WR.1.1.1 Material recycling is rarely done, but open-loop recycling and downcycling predominate	nm			WR.1.3.1 Extension of waste treatment by mechanical, biological, etc. treatment options	pm	WR.1.4.1 (Semi-)closed-loop recycling and upcycling increase	m	WR.1.5.1 (Semi-)closed-loop recycling dominates	nm	WR.1.3.1. + WR.1.3.2 --> pm; WR1.4.1 + WR1.4.2 --> m - Dedicated recycling vehicles pick up the mixed recyclables and deliver them to Mate-rials Recovery Facilities (MRF) for sorting. The recyclables are separated up into vari-ous waste streams, baled, and shipped to domestic and international recycling facili-ties. However, as the recycling rate for certain recyclable materials is still relative…
							WR.1.4.2 Dialogues between manufactures and recyclers take place to identify and solve recycling problems	m	WR.1.5.2 Implementation of circular bioeconomy	na
	WR.1.1.2 Ensured input for recycling plants is lacking	nm			WR.1.3.2 Input for recycling plants is partly ensured	pm	WR.1.4.3 Input for recycling plants is fully ensured	nm
WR.2	WR.2.1.1 Organic waste is landfilled or is composted at home or used as animal food	nm	WR.2.2.1 Recycling of organics in simple or open composting plants or with mobile aggregates	na	WR.2.3.1 Introduction of static, closed composting in tunnels / containers with sorting technologies	pm	WR.2.4.1 Integration of (quasi-) dynamic processes in existing plants	na	WR.2.5.1 Microplastics is removed from compost	na	WR2.3.1 + WR2.3.2 --> pm; WR3.3.1 + WR3.3.2 + WR.3.3.3 --> pm - Singapore is a highly urbanized country with high food wastage. According to Ministry of Environment and Water Resources (MEWR), Singapore generated 703,200 tons, and only 12% of them are recycled into animal feeds, organic fertilizer and bio energy. - According to NEA research, each household disposed of the potential of food waste …
			WR.2.2.2 Compost has low compost quality	na	WR.2.3.2 Increased use of compost in agriculture & landscape management	pm	WR.2.4.2 High quality compost, which still contains microplastic	na	WR.2.5.2 Very high quality and purity level of compost	na
							WR.2.4.3 Increased use of compost in the private sector	na
WR.3	WR.3.1.1 No planned or operation fermentation plants	nm	WR.3.2.1 Planning or construction of fermentation plants	pm	WR.3.3.1 Fermentation plants recycle organics	pm			WR.3.5.1 Biogas plants are an essential component of CE	na
					WR.3.3.2 Separation of impurities for energetical use of biogas (e.g. in combined heat and power plants)	pm	WR.3.4.1 Introduction of CO2-separation stage at plants	na
							WR.3.4.2 Feeding of biomethan into the natural gas grid	na
					WR.3.3.3 Fermentation residues are used as fertilizers	pm	WR.3.4.3 Very high quality of digestates	na	WR.3.5.2 Mostly full removal of microplastics from digestates	na
WR.4	WR.4.1.1 Manual sorting of recyclables	nm	WR.4.2.1 Partially automated sorting of recyclables (incl. shredding and separation units)	pm	WR.4.3.1 Increase of sorting efficiencies through mechanical separation, screening aggregates	m	WR.4.4.1 Generation of high-quality fractions through modern sorting facilities	m	WR.4.5.1 Increasingly digitalized recycling technologies	nm	WR.4.2.1 + WR.4.2.2 --> pm; WR.4.3.1 + WR 4.3.2 + WR4.4.1 --> m - To promote the regional waste recycling industry, Sarimbun Recycling Park (SRP) was established. The SRP contributes nearly a quarter of all waste recycled in Singapore and plays a significant role in resource recovery. It is divided into smaller land parcels that are leased to recycling businesses and are managed by NEA. Additiona…
	WR.4.1.2 Inefficient recovery of valuable materials from electronic waste	nm	WR.4.2.2 Recovery of metals and RDFs in mechanical-biological plants	pm	WR.4.3.2 Generation of high quality mono-fractions	m			WR.4.5.2 Increasing use of digitalization measures to rise recyclability of products	nm
					WR.4.3.3 Use of stabilate processes to separate metals and RDFs	na	WR.4.4.2 Production of methanol or synthesis gas from raw material plastic recycling	na
									WR.4.5.3 Safe recycling of waste containing harmful substances	pm
WR.5	WR.5.1.1 Lack of RDFs recovery from waste	nm	WR.5.2.1 Start of RDF recovery from waste treatment plants	pm	WR.5.3.1 Increasing recovery of RDFs from waste	pm			WR.5.5.1 RDF is decreasing due higher closed loop recycling	na	WR.5.2.1 + WR5.3.1 --> pm -In Singapore, there is a different formula for RDF such as Singapore RDF that base on the waste component distributed in Singapore (SGRDF), Singapore Chicken Manure (SGCM) and landfill mining materials (SGLF) [20].
WR.6	WR.6.1.1 Only conventional demolition of buildings	nm	WR.6.2.1 Mostly conventional demolition of buildings	nm	WR.6.3.1 Semi-selective demolition occurs predominantly	pm	WR.6.4.1 Predomination of selective demolition	pm	WR.6.5.1 Only selective demolition occurs	na	WR.6.3.1 + WR6.3.2 + WR.6.4.1 + WR.6.4.2 --> pm; WR.6.4.3 + WR.6.4.4 + WR6.5.2 -->m - C&D waste is commonly generated during the construction, demolition, and renova-tion of buildings. The Building and Construction Authority (BCA) established the Demolition Protocol to assist demolition companies in planning their demolition activ-ities to maximize C&D waste recycling where reusable and non-reusa…
	WR.6.1.2 Depollution is done rarely	nm	WR.6.2.2 More frequent de-pollution	nm			WR.6.4.2 Depollution is usual practice in demolition	pm
	WR.6.1.3 C&D waste disposal on landfills/dumps predominates	nm	WR.6.2.3 Rare use of C&D material as filler or surface excavations	nm	WR.6.3.2 Increased use of C&D materials as filler or for landfill construction	pm	WR.6.4.3 Increased high quality recycled construction material	m	WR.6.5.2 Almost complete recycling of C&D waste, little is landfilled	m
					WR.6.3.3 Emerging of recycling routes for C&D materials (road construction)	nm	WR.6.4.4 Thermal treatment or landfilling of non-recyclable construction materials	m	WR.6.5.3 Prohibition of non-recyclable materials for construction	na
							WR.6.4.5 Use of robotics for efficient sorting	na
WR.7	WR.7.1.1 Precise recycling rate numbers are missing	nm	WR.7.2.1 Recycling rates:		WR.7.3.1 Recycling rates:		WR.7.4.1 Recycling rates:		WR.7.5.1 Recycling rates:		In 2021, Singapore has a rather high recycling rate in terms of non-domestic waste, particularly on ferrous metal (99%), non-ferrous metal (98%), construction and demo-lition waste (99%), horticulture (83%), scrap tires (95%) and used slag (99%). However, when it comes to domestic waste recycling, the recycling rate is relatively low though it has slightly increased from the previous year. Curren…
			Metals: ≤ 40 %	nm	Metals: > 40 and ≤ 70 %	nm	Metals: > 70 and ≤ 90 %	nm	Metals: > 90 %	m
			Paper: ≤ 40 %	m	Paper: > 40 and ≤ 70 %	nm	Paper: > 70 and ≤ 90 %	nm	Paper: > 90 %	nm
			Glass: ≤ 40 %	m	Glass: > 40 and ≤ 70 %	nm	Glass: > 70 and ≤ 90 %	nm	Glass: > 90 %	nm
			Composites: ≤ 20 %	m	Composites: > 20 and ≤ 60 %	nm	Composites: > 60 and ≤ 90 %	nm	Composites: > 90 %	nm
			Plastics: ≤ 20 %	m	Plastics: > 20 and ≤ 60 %	nm	Plastics: > 60 and ≤ 90 %	nm	Plastics: > 90 %	nm
			WR.7.2.2 Recycling rates:		WR.7.3.2 Recycling rates:		WR.7.4.2 Recycling rates:		WR.7.5.2 Recycling rates:
			E-Waste: > 10 and ≤ 40 %	na	E-Waste: > 40 and ≤ 70 %	na	E-Waste: > 70 and ≤ 90 %	na	E-Waste: > 90 %	na
			C&D waste: > 10 and ≤ 40 %	nm	C&D waste: > 40 and ≤ 70 %	nm	C&D waste: > 70 and ≤ 90 %	nm	C&D waste: > 90 %	m
WR.8	WR.8.1.1 CMUR: ≤ 1 % OR no data	m	WR.8.2.1 CMUR: > 1 % ≤ 10 %	na	WR.8.3.1 CMUR: > 10 % ≤ 30 %	na	WR.8.4.1 CMUR: > 30 % ≤ 70 %	na	WR.8.5.1 CMUR: > 70 %	na	There is no information available for diversion rates (DR) and the circular material use rate (CMUR).
	WR.8.1.2 DR: ≤ 0,1 OR no data	m	WR.8.2.2 DR: > 0,1 ≤ 0,2	na	WR.8.3.2 DR: > 0,2 ≤ 0,4	na	WR.8.4.2 DR: > 0,4 ≤ 0,7	na	WR.8.5.2 DR: > 0,7 ≤ 1,0	na
m	fully met
pm	partially met
nm	not met
na	not available

## Sheet: Prevention and Reuse
	Stage 1		Stage 2		Stage 3		Stage 4		Stage 5		Rationale / Source
Prevention and reuse (PR.1 - PR.6)
PR.1	PR.1.1.1 Prevention is motivated by poverty	nm	PR.1.2.1 Prevention is motivated by lack of resources	pm					PR.1.5.1 Decoupling of GDP and waste generation	nm	PR.1.2.1 + PR.1.5.1 + PR1.5.2 + PR1.5.3 + PR.1.5.4 + PR.1.5.5 + PR1.5.7 --> pm; PR1.4.1.1 + PR1.4.2 + PR1.4.4 --> m; Singapore is classified as a high-income country with a gross national income (GNI) per capita of 64,010 US Dollars in 2021 [23]. Therefore, the motivation for waste pre-vention is relatively due to the lack of resources rather than by poverty. Food waste accounts for about 12 per …
					PR.1.3.1 Higher political priority for food waste issues	m	PR.1.4.1 Formulation of food waste avoidance targets and implementation of measures	m	PR.1.5.2 Food waste is reduced to a minimum	nm
					PR.1.3.2 Few disposables are banned or permitted exceptionnally	m	PR.1.4.2 All disposables are banned or permitted exceptionnally	m	PR.1.5.3 CE reduces negative impacts of materials and products by avoiding resources or waste	na
							PR.1.4.3 Prohibited destruction of unsold durable goods	na	PR.1.5.4 Increase of bans for substances and products	na
					PR.1.3.3 Emerging initiatives to educate the population regarding closing-loops	m			PR.1.5.5 CE provides long use of raw materials in the cycle	na
							PR.1.4.4 Ensured lifetime-extension of buildings before construction	m	PR.1.5.6 Full deconstruction of buildings is ensured before their realization	na
									PR.1.5.7 Consumption decisions based on waste prevention	na
PR.2	PR.2.1.1 Lack of circular business and usage models	nm	PR.2.2.1 Spare parts of End-of-life (EoL) products are used for repair	pm	PR.2.3.1 Increased use of EoL spare parts	pm			PR.2.5.1 Permanent provision of spare parts through digitalization	na	PR.2.2.1 + PR.2.2.2 + PR2.3.1 + PR2.3.2 + PR.2.3.2 + PR2.3.5 --> pm; PR.2.3.3 + PR.2.4.2 --> m - In Singapore, there are several channels promoting the donation, resales and repairs as well as the use of EoL spare parts for repair purposes of different types of goods such as electronic equipment, clothing, baby products, furniture, food, toys etc. [25]. Fur-thermore, there are online spare parts …
					PR.2.3.2 Small use of professional repair by small part of the population	pm	PR.2.4.1 High use of professional repair by big part of the population	nm
					PR.2.3.3 Minimum one online spare market exists	m	PR.2.4.2 Various online spare markets exist	m	PR.2.5.2 Spare part markets are an integral part of CE	na
					PR.2.3.4 Product service systems (sharing and leasing) are offered	pm			PR.2.5.3 Sharing and leasing are an integral part of CE	na
			PR.2.2.2 Voluntary take-back systems for certain wastes (e.g. pharmaceuticals, batteries) exist	pm	PR.2.3.5 Introduction of take-back or deposit systems for certain wastes (e.g. beverage packaging)	pm	PR.2.4.3 Deposit obligation to all single-use beverage packaging and change of deposit contribution	nm	PR.2.5.4 Innovative take-back and collection systems enable reuse and high-quality recycling	nm
							PR.2.4.4 Introduction of deposits on material relevant products (e.g. tablets, smartphones)	nm
PR.3	PR.3.1.1 Companies neglect EoL issues of their products	nm	PR.3.2.1 Pioneer companies are considering EoL issues of their products	pm	PR.3.3.1 Through Eco-design several manufacturers are producing in a more environmental friendly way	pm	PR.3.4.1 Increased use of homogenous easy separable, harmfree and secondary materials; less use of disruptive substances	pm	PR.3.5.1 High use of secondary, recyclable or biobased materials for product manufacture	na	PR.3.2.1 + PR.3.2.2 + PR3.3.1 + PR.3.4.1 + PR. 3.4.2 --> pm - A partnership known as Innovating Curating Better automation and Technology for environmental Services (INCUBATE) presently has 18 partners and was created with the goal of bringing the public and private sectors together to prototype, pilot, and pro-file solutions. Additionally, the government is attempting to change the production in…
	PR.3.1.2 Innovative composite materials are causing disposal problems due to the negligence of EoL in the product design phase	nm					PR.3.4.2 Recyclability, durability and upgradability is generally considered in product design phase	pm	PR.3.5.2 EoL concepts for innovative products prior to market introduction are elaborated to minimize problems at the EoL phase	na
	PR.3.1.3 Companies neglect recyclability, material saving and substitution of hazardous substances during product design phase	nm	PR.3.2.2 Some companies consider recyclability, material savings and substitution of hazardous substances in product design phase	pm					PR.3.5.3 Product recyclability is one basic condition for product marketing	na
							PR.3.4.3 Increasing life cycle assessment of products	pm	PR.3.5.4 Almost all companies consider all life cycle phases	na
					PR.3.3.2 Pioneer companies set voluntarly a minimum use rates for secondary resources in their products	pm	PR.3.4.4 Legal minimum use rates for recyclates in plastic products: between ≥ 30 % and < 60 %	na	PR.3.5.5 Legal minimum use rates or recyclates in plastic products: ≥ 60 %	na
PR.4	PR.4.1.1 Neglection of issues for proper waste disposal and waste avoidance in companies	nm	PR.4.2.1 Pioneer companies consider issues as improving their waste disposal and prevent waste	m	PR.4.3.1 Evaluation of production processes	m	PR.4.4.1 Inreased investigation of resource efficiency potentials	pm	PR.4.5.1 Waste avoidance and closing loops practice in companies	na	PR.4.2.1 + PR4.3.1 --> m; PR.4.4.1 + PR.4.5.1--> pm - Producers of packaging in Singapore, including brand owners, manufacturers, and im-porters, as well as retailers like supermarkets, would be obliged to submit packaging data and 3R plans to the NEA under the Mandatory Packaging Reporting (MPR) scheme. MPR seeks to increase corporate understanding of the advantages of packag-ing reduction and t…
					PR.4.3.2 Substitution of some hazardous materials with non or less hazardous materials	na	PR.4.4.2 Several companies are substituting hazardous with non-hazardous substances	na	PR.4.5.2 Use of pollutants in CE, if controlled circulation considering thresholds is ensured	na
PR.5	PR.5.1.1 WG: ≥ 2 kg/cap + d	nm	PR.5.2.1 WG: ≥ 1,5 < 2 kg/cap + d	nm	PR.5.3.1 WG: ≥ 1 < 1,5 kg/cap + d	m	PR.5.4.1 WG: ≥ 0,5 < 1 kg/cap + d	nm	PR.5.5.1 WG: < 0,5 kg/cap + d	nm	In 2021, Singapore generated approximately 5.59 million of tonnes of solid waste which is approximately 1.02 kg/cap/day [22].
PR.6	PR.6.1.1 ZWI: ≤ 0,05	na	PR.6.2.1 ZWI: > 0,05 ≤ 0,15	m	PR.6.3.1 ZWI: > 0,15 ≤ 0,4	nm	PR.6.4.1 ZWI: > 0,4 ≤ 0,9	nm	PR.6.5.1 ZWI: ≥ 0,9	nm	According to Zaman and Swapan, the ZWI for most Asian nations is very low to low where Singapore is listed in the rank of low Zero-waste index (between 0.05-0.10) [30].
m	fully met
pm	partially met
nm	not met
na	not available

## Sheet: References
Reference
1. National Environmental Agency. Public Cleanliness. Available online: https://www.nea.gov.sg/our-services/public-cleanliness/overview
2. National Environment Agency. Frequently asked questions on Revised Refuse Collection Fees for Households. Available online: https://www.nea.gov.sg/docs/default-source/wcd/faqs-on-revised-refuse-collection-fees-for-households_30-november-20218056a1daf2be4dd3b79f3a7bad1dc2ef.pdf
3. Sembcorb. Solid Waste Management. Available online: https://www.sembcorpenergy.com.sg/residential/solid-waste-management/
4. National Environmental Agency. Waste Collection System. Available online: https://www.nea.gov.sg/our-services/waste-management/waste-collection-systems
5. WONG, Aidan Marc. Valued waste/wasted value: Waste, value and the labour process in electronic waste recycling in Singapore and Malaysia. (2022). Geography Compass. 16, (4),. Research Collection College of Integrative Studies. https://doi.org/10.1111/gec3.12616
6. World Bank. What a Waste. Available online: https://datatopics.worldbank.org/what-a-waste/
7. National Environmental Agency. National Recycling Program. Available online: https://www.nea.gov.sg/our-services/waste-management/3r-programmes-and-resources/national-recycling-programme
8. National Environment Agency. Tuas Marine Transfer Station. Available online: https://www.nea.gov.sg/our-services/waste-management/3r-programmes-and-resources/waste-management-infrastructure/tuas-marine-transfer-station
9. National Environment Agency. E-waste Management. Available online: https://www.nea.gov.sg/our-services/waste-management/3r-programmes-and-resources/e-waste-management/where-to-recycle-e-waste
10. National Environment Agency. Toxic Waste Control. Available online: https://www.nea.gov.sg/our-services/pollution-control/hazardous-waste/toxic-waste-control
11. National Environment Agency. Waste Management Infrastructure – Semakau Landfill. Available online: https://www.nea.gov.sg/our-services/waste-management/3r-programmes-and-resources/waste-management-infrastructure/semakau-landfill
12. Zero Waste City. 50 Year of Waste Management in Singapore incinerators. Available online: https://zerowastecity.com/50-years-of-waste-management-in-singapore-incinerators/
13. San Ong. Waste to Energy Experience: The case of Singapore. Eighth Regional 3R Forum in Asia and the Pacific. Indore, Madhya Pradesh, India, from 9-12 April 2018.
14. National Environmental Agency. TuasOne - The Latest And Most Land Efficient Waste-To-Energy Plant In Singapore. Available online: https://www.nea.gov.sg/media/news/news/index/tuasone---the-latest-and-most-land-efficient-waste-to-energy-plant-in-singapore
15. National Environment Agency. Types of Recyclables and Recycling Processes. Available online: https://www.nea.gov.sg/our-services/waste-management/3r-programmes-and-resources/types-of-recyclables-and-recycling-processes
16. Singaporean-German Chamber of Industry and Commerce. Grün Book – Closing The Waste Loop Through Innovative Plastic Recycling.
17. Ministry of Sustainability and the Environment. Launch of the Plastic Recycling Association of Singapore. Available online: https://www.mse.gov.sg/resource-room/category/2021-08-17-speech-at-the-launch-of-pras/
18. National Environment Agency. Food Waste Management Strategies. Available online: https://www.nea.gov.sg/our-services/waste-management/3r-programmes-and-resources/food-waste-management/food-waste-management-strategies#strategy3
19. Composting in Singapore. Tutorials. Available online: https://compostinginsingapore.kainosis.com/category/tutorials/
20. The smart local Singapore. Behind the scenes at SembWaste Materials Recovery Facility. Available online: https://thesmartlocal.com/read/recycling-in-singapore-sembwaste/
21. Zhao, L.; Giannis, A.;. Characterization of Singapore RDF resources and analysis of their heating value, Sustainable Environment Research, Volume 26, Issue 1, 2016, Pages 51-54, ISSN 2468-2039, https://doi.org/10.1016/j.serj.2015.09.003.
22. Toward Zero Waste. How do we manage waste sustainably?. Available online: https://www.towardszerowaste.gov.sg/zero-waste-masterplan/chapter2/managing-waste-sustainably/
23. National Environment Agency. Waste Statistics and Overall Recycling. Available online: https://www.nea.gov.sg/our-services/waste-management/waste-statistics-and-overall-recycling
24. World Bank. GNI per capita, Atlas method (current US$). Available online: https://data.worldbank.org/indicator/NY.GNP.PCAP.CD
25. Toward Zero Waste. Food Waste. Available online: https://www.towardszerowaste.gov.sg/foodwaste/
26. National Environment Agency. Donation, Resale and Repair Channels. Available online: https://www.nea.gov.sg/our-services/waste-management/donation-resale-and-repair-channels
27. Toward Zero Waste. Chapter 5 - Transforming The Environmental Services Industry. Available online: https://www.towardszerowaste.gov.sg/zero-waste-masterplan/chapter5/
28. National Environment Agency. Mandatory Packaging Reporting. Available online: https://www.nea.gov.sg/our-services/waste-management/mandatory-packaging-reporting
29. National environment Agency. Mandatory Waste Reporting. Available online: https://www.nea.gov.sg/our-services/waste-management/mandatory-waste-reporting
30. Zaman, A., Swapan, M. Performance evaluation and benchmarking of global waste management systems, Resources, Conservation and Recycling, Volume 114, 2016, Pages 32-41, ISSN 0921-3449, https://doi.org/10.1016/j.resconrec.2016.06.020.
