# Supplementary material
Source: MDPI journal article supplement (https://www.mdpi.com/2813-0391/2/1/6)
Supplement: s1 [file s1 › WMS-DSC_Tool_2023_Vientiane.xlsx]

## Sheet: Results Overview
Overview of the results for the assessment of City, Country regarding								Overview of the results for the assessment of City, Country regarding
Governance, Sector and Market								Collection and Transport, Waste Disposal, Energy Recovery, Waste Recycling, Prevention and Reuse
		Stage 1	Stage 2	Stage 3	Stage 4	Stage 5				Stage 1	Stage 2	Stage 3	Stage 4	Stage 5
Governance	G.1 Duties and targets							Collection and transport	CT.1 Waste collection
	G.2 Laws, Regulations and Agreements								CT.2 Service provider
	G.3 Nomenclature								CT.3 Collection rates
	G.4 National level WM								CT.4 Separate collection
	G.5 Regional level WM								CT.5 Collection of recyclables
	G.6 Municipal level WM								CT.6 Waste transport
	G.7 Stakeholder cooperation								CT.7 Transfer stations
	G.8 Control mechanisms								CT.8 Collection of hazardous wastes
	G.9 Authorization and public participation							Waste disposal	WD.1 Waste disposal
	G.10 Quality standards and threshold values								WD.2 Operational measures
	G.11 Data collection, reporting and evaluation								WD.3 Leachate water management
	G.12 Education								WD.4 Landfill gas management
	G.13 Research								WD.5 Other means of disposal
	G.14 Awareness building							Energy recovery	ER.1 Thermal disposal and energy recovery
	G.15 Occupational health and safety								ER.2 Incineration plants
	G.16 Environmental protection								ER.3 Energy and raw material recovery
Sector and Market	SM.1 Sector development							Waste recycling	WR.1 Waste recycling
	SM.2 Jobs								WR.2 Composting
	SM.3 Informal sector								WR.3 Fermentation
	SM.4 WM system structure and organization								WR.4 Sorting and recycling plants
	SM.5 Financial funding								WR.5 Refuse derived fuel
	SM.6 Enterprises								WR.6 Recycling of construction and demolition waste
	SM.7 Recycling market								WR.7 Recycling rates
									WR.8 Diversion rate and Circular material use rate
								Prevention and reuse	PR.1 Prevention
									PR.2 Circular business and usage models
									PR.3 Product design
									PR.4 Process optimization and operational disposal strategies
									PR.5 Waste generation
									PR.6 Zero-waste index
								m	Subcomponent is met
								pm	Subcomponent is partly met
									Subcomponent is not met or data is not available

## Sheet: Collection and Transport
	Stage 1		Stage 2		Stage 3		Stage 4		Stage 5		Rationale / Source
Collection and transport (CT.1 - CT.8)
CT.1	CT.1.1.1 Lack of systematic collection; limited collection	m	CT.1.2.1 Collection is systematic, but inefficient	m	CT.1.3.1 Efficient collection through optimizing measures and concepts	pm	CT.1.4.1 Underground systems in public spaces	nm	CT.1.5.1 Waste bins have no negative effect on landscape	nm	CT.1.2.1 + CT.1.2.4 --> m; CT.1.2.2 + CT.1.2.3 + CT.1.3.1 + CT.1.3.3 --> pm; Waste collection service is still limited in different province throughout the country. The collection is systematic but still very inefficient only 40%-60% of total waste generated make their way to landfill. Waste collection is often limited to urban centers while areas that are far away from city centers or have poor …
	CT.1.1.2 Lack of uniform collection bins	m	CT.1.2.2 Use of uniform aboveground systems	pm	CT.1.3.2 Use of new bin systems (e.g. waste locks)	nm	CT.1.4.2 Waste bins with fill level sensors	nm	CT.1.5.2 Avoid of container overfilling (smart bins)	nm
			CT.1.2.3 Collection points are within 200m distance	pm	CT.1.3.3 Service provision of cleaning up bins	pm	CT.1.4.3 Introduction of digitalization measures	nm	CT.1.5.3 Smart waste container separation	nm
	CT.1.1.3 Missing of basic principles of urban hygiene, major littering exists	m	CT.1.2.4 Urban hygiene principles are partially met, but littering in public spaces remains a problem	m					CT.1.5.4 Full maintainance of urban hygiene principles and no littering in public spaces	nm
CT.2	CT.2.1.1 Collection mostly by waste pickers	nm	CT.2.2.1 Collection mostly by formal sector	pm	CT.2.3.1 Collection mostly by formal or organized informal sector	pm			CT.2.5.1 Waste collection exclusively by formal sector	nm	CT.2.2.1 + CT.2.1.1 --> m; CT.3.1.1 -->m: Household collection services are often limited by a lack of accessibility, no service contracts, and poor equipment. Households must be contracted in to receive a service, and many do not sign up due to lack of regulation, enforcement capacities or because the service cannot reach them. In Vientiane municipality, only 27 percent of households have a cont…
CT.3	CT.3.1.1 Collection rate (CR): urban ≤ 50% OR no data	m	CT.3.2.1 CR: urban > 50 and ≤ 70%	nm	CT.3.3.1 CR: urban > 70 and ≤ 80%	nm	CT.3.4.1 CR: urban > 80 and ≤ 95%	nm	CT.3.5.1 CR: urban > 95% and ≤ 100%	nm
	rural ≤ 30% OR no data	m	rural > 30 and ≤ 50%	nm	rural > 50 and ≤ 80%	nm	rural > 80 and ≤ 95%	nm	rural > 95% and ≤ 100%	nm
CT.4	CT.4.1.1 Collective collection of residual waste	m	CT.4.2.1 First forms of separation at source collection (2 fractions)	pm	CT.4.3.1 Mandatory waste collection for households and businesses (>3 fractions)	pm	CT.4.4.1 Reduction of illegal collection (e.g. electronics)	nm	CT.4.5.1 All recyclables are collected separately	nm	CT.4.1.1 + CT.4.1.2 + CT.4.2.1 + CT.4.2.2 + --> m; CT.4.2.1 + CT.4.2.3 + CT.4.3.1 + CT.4.3.2 + CT.4.3.4 --> pm: Recycable materials are solely collected by informal sector, which collection can be done directly from generators means door to door collection service, and then sell to buying centers or junkshop. There is also a group of informal sector working at landfill to separate recyable materi…
	CT.4.1.2 Recyclables solely collected by waste pickers	m	CT.4.2.2 Recyclables collected by (in)formal sector	m	CT.4.3.2 Set up of recycling centers	pm
					CT.4.3.3 Rate of incorrect sorting > 30%	nm	CT.4.4.2 Rate of incorrect sorting > 10 to ≤ 30%	nm	CT.4.5.2 Rate of incorrect sorting ≤ 10%	nm
			CT.4.2.3 Separate collection of hospital waste	pm	CT.4.3.4 Separate collection of: electrical, construction, demolition, agricultural and forestry waste	pm
CT.5	CT.5.1.1 CR are missing, only estimations are available or data is not publicly available	m	CT.5.2.1 Recyclables CR:		CT.5.3.1 Recyclables CR:		CT.5.4.1 Recyclables CR:		CT.5.5.1 Recyclables CR:		CT.5.1.1 --> m: There is no information regarding the collection rate on specific waste stream.
			Metals: ≤ 50%	na	Metals: > 50 and ≤ 70%	na	Metals: > 70 and ≤ 90%	na	Metals: > 90%	na
			Paper: ≤ 30%	na	Paper: > 30 and ≤ 70%	na	Paper: > 70 and ≤ 90%	na	Paper: > 90%	na
			Glass: ≤ 30%	na	Glass: > 30 and ≤ 70%	na	Glass: > 70 and ≤ 90%	na	Glass: > 90%	na
			Organics: ≤ 30%	na	Organics: > 30 and ≤ 70%	na	Organics: > 70 and ≤ 90%	na	Organics: > 90%	na
			Plastics : ≤ 10%	na	Plastics: > 10 and ≤ 50%	na	Plastics: > 50 and ≤ 90%	na	Plastics: >90%	na
			Textiles: ≤ 10%	na	Textiles: > 10 and ≤ 50%	na	Textiles: > 50 and ≤ 90%	na	Textiles: >90%	na
CT.6	CT.6.1.1 Formal: Only use of simple vehicles	m	CT.6.2.1 Formal: Mostly use of large fleets and automation	m	CT.6.3.1 Formal: Waste firms improve vehicle fleets (incl. compactors, lifters).	pm	CT.6.4.1 Use vehicles depending on waste type	nm	CT.6.5.1 Higly engineered and fully automated vehicles	nm	CT.6.1.1 + CT.6.2.1 --> m; CT6.1.2 + CT.6.2.2 + CT.6.3.1 + CT.6.3.2 --> pm: VCOMS, which now has a fleet of 65 trucks. The vehicles sourced by the Japanese government through JICA consist of 40 compactor trucks, 2 dump trucks, 4 skip loaders and 1 vehicle for medical waste collection (JICA, 2014) [3]. Informal sector often use small cart attached with motorbike and small to medium truck for colle…
	CT.6.1.2 Informal: Only use of pack animals, handcarts, etc.	pm	CT.6.2.2 Informal: Mostly use of small or modified vehicles	pm	CT.6.3.2 Informal: Mostly use of modernized small trucks	pm	See WM 3.4.1
CT.7	CT.7.1.1 Direct transport of waste to landfills or dumps	m	CT.7.2.1 Introduction of transfer stations (TS)	m	CT.7.3.1 TS increase collection efficiency	pm			CT.7.5.1 All existing TS are state of the art	nm	CT.7.1.1 + CT.7.2.1 --> m; CT.7.2.2 + CT.7.3.1 + CT.7.3.2 --> pm: There is a transfer station which began operation in January 2016 with Japan's grant aid. In 2019, of the final disposal amount of 147,836 tons, 15% of them, 22,114 tons went through the facility. At present, only the garbage trucks of VCOMS’s own collection companies use it, and the tipping fee for using the facility is not collec…
	CT.7.1.2 Roads used as transfer areas for waste	nm	CT.7.2.2 Simple TS are unrestricted accessible to public	pm	CT.7.3.2 Advanced TS with restricted access to public.	pm
CT.8	CT.8.1.1 Lack of separate collection of hazardous waste (HW) from households	m	CT.8.2.1 Small HW quantities from households are collected separatly	pm	CT.8.3.1 Disposal of small quantities of HW is free of charge	pm	CT.8.4.1 Full collection of HW flows	nm	CT.8.5.1 HW quantities are reduced to a minimum	nm	CT.8.1.1 --> m; CT.8.1.2 + CT.8.2.1 --> pm; In many cases, medical waste and hazardous waste are also dumped in municipal waste disposal sites and vacant lots without proper treatment [2]. However, there is an initial for collection point of household hazardous material such as batteries from Green Vientaine and E-waste collection from Makerbox and National Universiy of Laos [4;5]
	CT.8.1.2 Lack of separate collection of industrial HW	pm			CT.8.3.2 Industrial HW is collected almost separately	pm
m	fully met
pm	partially met
nm	not met
na	not available

## Sheet: Waste Disposal
	Stage 1		Stage 2		Stage 3		Stage 4		Stage 5		Rationale / Source
Waste disposal (WD.1 - WD.5)
WD.1	WD.1.1.1 Lack of targeted and centralized waste disposal	pm	WD.1.2.1 Targeted and centralized waste disposal in minimum controlled landfills	m	WD.1.3.1 Introduction of landfill classes	nm	WD.1.4.1 Mineral waste is predominantly landfilled	nm	WD.1.5.1 Waste landfilling gets less important	nm	WD.1.2.1 + WD.1.2.2, WD.1.2.3 --> m; WD.1.1.1 + WD.1.1.2 + WD.1.1.3 + WD.1.1.4 --> pm: & WD.2.1.1 + WD2.1.2 + WD.2.1.3 + WD.2.1.4 + WD2.2.1 +WD.2.2.2 + WD.2.2.3 + WD.2.2.5 --> pm; & Major cities have access to a registered landfill, but usually these landfills are old, unsanitary, operated as open dumpsites, contaminate the environment, and come with severe environmental, health and safety risks.…
	WD.1.1.2 Disposal in open dumps, uncontrolled landfills, roads etc.	pm	WD.1.2.2 Open burning and dumping is illegal, but still practiced	m	WD.1.3.2 Non-hazardous and hazardous waste are no longer disposed together	nm	WD.1.4.2 Recyclables are rarely landfilled	nm	WD.1.5.2 Small quantities of waste are landfilled	nm
	WD.1.1.3 Open burning for eliminiation and energy recovery	pm			WD.1.3.3 Liquid waste is no longer disposed in landfills	nm	WD.1.4.3 After-use of landfills gets more relevant	nm	WD.1.5.3 Reuse of closed landfill areas for other purposes	nm
					WD.1.3.4 Conversion of (in)active landfills to sanitary standard.	na	WD.1.4.4 Waste is disposed exclusively on sanitary landfills	nm	WD.1.5.4 Importance of rehabilitation of old landfills	nm
							WD.1.4.5 Safe disposal of disaster waste on approved sites	nm	WD.1.5.5 Full avoidance of illegal dumping	nm
	WD.1.1.4 Open dump and controlled dump predominate	pm	WD.1.2.3 Controlled or engineered landfill predominate	m			WD.1.4.6 Sanitary landfill predominates	nm	WD.1.5.6 All (in)active landfills have sanitary landfill standard	nm
WD.2	WD.2.1.1 Lack of disposal controls (waste registration)	pm	WD.2.2.1 Registration of waste type, etc. before disposal	pm	WD.2.3.1 Registration and compaction of waste are the norm	nm			WD.2.5.1 All existing and new landfills comply with the current state of art	nm
	WD.2.1.2. Waste is burned on dumping sites	pm	WD.2.2.2 Waste burning on landfill sites is missing	pm	WD.2.3.2 Systematic pre-treatment of waste is mandatory	nm
	WD.2.1.3 Landfill access controls are lacking or inadequate	pm	WD.2.2.3 Compaction and daily cover of waste	pm	WD.2.3.3 Systematic landfill management is carried out	nm
			WD.2.2.4 Site drawing showing landfill boundary and filling area in place	pm	WD.2.3.4 Realization of measures for (post-)closure management	nm
	WD.2.1.4 Dumping sites are not staffed or only in short times for site checking	pm	WD.2.2.5 Site is staffed during operational hours	pm
WD.3	WD.3.1.1 Leachate infiltrates soil or evaporates	m	WD.3.2.1 Available leachate collection	pm	WD.3.3.1 Leachate collection and treatment in all active landfills	nm	WD.3.4.1 Compliance of strict limits at water monitoring	nm	WD.3.5.1 Decrease of leachate and toxicity	nm	WD.3.1.1 + WD.3.1.2 --> m; WD3.2.1 + WD.3.2.3 -->pm: Leachate generated in the landfill is treated through a system of stabilization ponds, along 3 treatment stages. It is not certain how effective the treatment system is during the field trip. Soil cover is regularly applied but only during the dry season. Incoming waste is subject to minimum compaction, so as to enable its arrangement in layers…
	WD.3.1.2 Lack of surface and groundwaster monitoring	m	WD.3.2.2 Recirculation of leachate in the landfill body	na
			WD.3.2.3 Surface and groundwater is monitored	pm
WD.4	WD.4.1.1 Landfill gas is released into the atmosphere	m	WD.4.2.1 Implementation of passive collection or flaring of landfill gas	nm	WD.4.3.1 Landfill gas collection for energy recovery and gas monitoring	nm	WD.4.4.1 Compliance of strict limits for gas monitoring	nm	WD.4.5.1 Controlled flaring of landfill gas only in emergencies and when it is unprofitable (small gas quantities)	nm	WD.4.1.1 --> m: Landfill gas is currently not captured or utilized.[3]
WD.5	WD.5.1.1 Waste burning or dumping on high seas and coastal waters	m			WD.5.3.1 Waste burning or dumping on high seas and coastal waters is prohibited, but still takes place	nm			WD.5.5.1 Avoidance of waste burning or dumping on high seas and coastal waters	nm	There is no report on waste burning on the coastal areas - as Laos is a landlocked country. However, Open and informal dumping occur on land and on riverbanks. Across the six surveyed cities there were 149 dumpsites observed. The size of dumpsites varied but on average they were seven cubic meters. More than 50 percent of dumpsites were located inland, and these tended to be much bigger in size […
m	fully met
pm	partially met
nm	not met
na	not available

## Sheet: Energy Recovery
	Stage 1		Stage 2		Stage 3		Stage 4		Stage 5		Rationale / Source
Energy Recovery (ER.1 - ER.3)
ER.1	ER.1.1.1 Controlled energy recovery or thermal disposal is missing	pm	Availability of organizational criteria:		ER.1.3.1 ER is used to treat large waste quantities of the city inside or outside the country	nm	ER.1.4.1 ER is essential treatment alternative	nm	ER.1.5.1 Incinerated waste amount decreases due to higher recycling rates	nm	ER.1.1.1 + ER1.1.2 + technical criteria + organizational criteria + ER.2.1.1 --> pm; ER.3.1.1 --> m: There are currently two incinerators under responsibility of VCOMS for treating medical waste which one incinerator has a capacity of 76kg/day; and another incinerator with 800kg/day. These incinerators located in the landfill where there are additional pit for dispose of waste within the medical …
			I) controlled landfills	m	ER.1.3.2 Agreements regulate waste delivery, energy sales and pricing	nm
			II) qualified staff	pm	ER.1.3.3 At least 150.000 tons/y of suitable waste are available for incineration	nm	ER.1.4.2 Lower heating value has to be at least 11 MJ/kg	nm
			III) systematic collection	pm
			IV) Sorting at source is implemented	nm
			V) Basic WM laws and rules are developed	m
			VI) Incineration plants are positioned in political plans	na
			VII) Political and social will is given	na
			VIII) Total costs for the plant are secured	na
			IX) Public or private actors are experienced in managing incineration plants efficiently	na
			X) Spare parts can be purchased locally or imported	na
			Availibility of technical criteria:
			I) stable supply of combustible waste	na
			II) lower heating value at least 7 MJ/kg
			III) Bottom and fly ash can be treated safely	nm
	ER.1.1.2 Co-incineration of waste is missing	pm	ER.1.2.3 Co-incineration of specific waste or RDFs in industrial firing plants	pm	ER.1.3.4 ER as alternative for landfilling; energy-intensive industries often make use of it	na
ER.2	ER.2.1.1 Waste incinerators are neither operating or planned in the country	pm	ER.2.2.1 Incineration plants (incl. flue gas cleaning - FGC) are in planning or construction in the country or simple incineration plants without FGC are in operation with engineered process controls (incl. continous monitoring and recording of operating parameters)	nm	ER.2.3.1 Operation of waste incinerators with FGC	nm	ER.2.4.1 High-tech and state of the art processes ensure reliability and safe emission elimination	nm	ER.2.5.1 Automatic and homogenous waste input	nm
					I) Continuous monitoring of operating parameters and emissions	nm	ER.2.4.2 Flue gas controls compliant with applicable environmental standards	nm
					II) Monitoring systems are routinely calibrated	nm
					III) Maintenance plans or schedules are in place	nm
					IV) Evidence that equipment is well maintained	nm
					V) Fire extinguishers available on site	nm
ER.3	ER.3.1.1 Raw material and ER through controlled waste incineration is missing	m	ER.3.2.1 Possible recovery of energy through waste incineration	nm	ER.3.3.1 Selling of recovered energy (electrical, thermal, combination)	nm			ER.3.5.1 Increased replacing of primary energy resources	nm
					ER.3.3.2 Incineration or RDF plants are located in areas with moderate heat demand and good transport and energy infrastructure exists	nm
			ER.3.2.2 Recycling of incineration residues is missing	nm	ER.3.3.3 Recovered metals from incineration process are sold; other by-products are treated safely, but recycled rarely	nm	ER.3.4.1 Increased recycling and reuse of slags	nm	ER.3.5.2 Almost complete reintroduction of by-products from incineration into the economic cycle	nm
m	fully met
pm	partially met
nm	not met
na	not available

## Sheet: Waste Recycling
	Stage 1		Stage 2		Stage 3		Stage 4		Stage 5		Rationale / Source
Waste recycling (WR.1 - WR.8)
WR.1	WR.1.1.1 Material recycling is rarely done, but open-loop recycling and downcycling predominate	m			WR.1.3.1 Extension of waste treatment by mechanical, biological, etc. treatment options	pm	WR.1.4.1 (Semi-)closed-loop recycling and upcycling increase	nm	WR.1.5.1 (Semi-)closed-loop recycling dominates	nm	WR.1.1.1 + WR.1.1.2 --> m: No formal government-organized recycling program exists in the Lao PDR but there is an active recycling industry in some of the cities. This recycling industry tends to focus on the most valuable recyclables such as plastic, steel, copper, aluminum, and glass. No processing of materials takes place except in Vientiane. Collected materials are sorted, separated, and then…
							WR.1.4.2 Dialogues between manufactures and recyclers take place to identify and solve recycling problems	nm	WR.1.5.2 Implementation of circular bioeconomy	nm
	WR.1.1.2 Ensured input for recycling plants is lacking	m			WR.1.3.2 Input for recycling plants is partly ensured	pm	WR.1.4.3 Input for recycling plants is fully ensured	nm
WR.2	WR.2.1.1 Organic waste is landfilled or is composted at home or used as animal food	m	WR.2.2.1 Recycling of organics in simple or open composting plants or with mobile aggregates	pm	WR.2.3.1 Introduction of static, closed composting in tunnels / containers with sorting technologies	nm	WR.2.4.1 Integration of (quasi-) dynamic processes in existing plants	nm	WR.2.5.1 Microplastics is removed from compost	nm	WR.2.1.1 --> m; WR.2.2.1 + WR.2.2.2 --> pm: While organic waste makes up approximately half of waste generated, there is no large-scale, centralized composting of municipal solid waste. However, it is commonly known that in rural areas, food waste is frequently used as food for animals and companies are even reported to collect (and, in some cases, even pay) for the collection of such waste. [1]
			WR.2.2.2 Compost has low compost quality	pm	WR.2.3.2 Increased use of compost in agriculture & landscape management	nm	WR.2.4.2 High quality compost, which still contains microplastic	nm	WR.2.5.2 Very high quality and purity level of compost	nm
							WR.2.4.3 Increased use of compost in the private sector	nm
WR.3	WR.3.1.1 No planned or operation fermentation plants	m	WR.3.2.1 Planning or construction of fermentation plants	nm	WR.3.3.1 Fermentation plants recycle organics	nm			WR.3.5.1 Biogas plants are an essential component of CE	nm	WR.3.1.1 --> There is no planned or fermentation planned in the country - and no information for further discussion.
					WR.3.3.2 Separation of impurities for energetical use of biogas (e.g. in combined heat and power plants)	nm	WR.3.4.1 Introduction of CO2-separation stage at plants	nm
							WR.3.4.2 Feeding of biomethan into the natural gas grid	nm
					WR.3.3.3 Fermentation residues are used as fertilizers	nm	WR.3.4.3 Very high quality of digestates	nm	WR.3.5.2 Mostly full removal of microplastics from digestates	nm
WR.4	WR.4.1.1 Manual sorting of recyclables	m	WR.4.2.1 Partially automated sorting of recyclables (incl. shredding and separation units)	pm	WR.4.3.1 Increase of sorting efficiencies through mechanical separation, screening aggregates	nm	WR.4.4.1 Generation of high-quality fractions through modern sorting facilities	nm	WR.4.5.1 Increasingly digitalized recycling technologies	nm	WR.4.1.1 + WR.4.1.2 --> m; WR.4.2.1 --> pm: The number and type of plastic waste facilities that currently exist in the six surveyed cities in the Lao PDR: > There are 15 retailers and compacting centers and six of them are in Pakse and four of them in Vang Vieng. > There are nine crushing sites and all of them are in Vientiane. > There are five recycling centers producing pellets and granules an…
	WR.4.1.2 Inefficient recovery of valuable materials from electronic waste	m	WR.4.2.2 Recovery of metals and RDFs in mechanical-biological plants	nm	WR.4.3.2 Generation of high quality mono-fractions	nm			WR.4.5.2 Increasing use of digitalization measures to rise recyclability of products	nm
					WR.4.3.3 Use of stabilate processes to separate metals and RDFs	nm	WR.4.4.2 Production of methanol or synthesis gas from raw material plastic recycling	nm
									WR.4.5.3 Safe recycling of waste containing harmful substances	nm
WR.5	WR.5.1.1 Lack of RDFs recovery from waste	m	WR.5.2.1 Start of RDF recovery from waste treatment plants	nm	WR.5.3.1 Increasing recovery of RDFs from waste	nm			WR.5.5.1 RDF is decreasing due higher closed loop recycling	nm	WR.5.1.1 --> m: There is a lack of RDFs recovery from waste in Vientiane, or information are not available. However, there is a study on RDFs in Luang Prabang for treateat hazardous waste and mixed waste and produce RDFs as a case study. [6]
WR.6	WR.6.1.1 Only conventional demolition of buildings	m	WR.6.2.1 Mostly conventional demolition of buildings	m	WR.6.3.1 Semi-selective demolition occurs predominantly	nm	WR.6.4.1 Predomination of selective demolition	nm	WR.6.5.1 Only selective demolition occurs	nm	WR.6.1.1 + WR.6.1.2 + WR.6.1.3 + WR.6.2.1 --> m: Construction and demolision waste is not widely discuss nationwide. It is often the responsibility of the construction site and contractors to manage these waste, which varied from projects through project, and the envionmental and monitoring varied depend on the project scale. The demolision of building are rarely done and mostly conventional. The…
	WR.6.1.2 Depollution is done rarely	m	WR.6.2.2 More frequent de-pollution	nm			WR.6.4.2 Depollution is usual practice in demolition	nm
	WR.6.1.3 C&D waste disposal on landfills/dumps predominates	m	WR.6.2.3 Rare use of C&D material as filler or surface excavations	nm	WR.6.3.2 Increased use of C&D materials as filler or for landfill construction	nm	WR.6.4.3 Increased high quality recycled construction material	nm	WR.6.5.2 Almost complete recycling of C&D waste, little is landfilled	nm
					WR.6.3.3 Emerging of recycling routes for C&D materials (road construction)	nm	WR.6.4.4 Thermal treatment or landfilling of non-recyclable construction materials	nm	WR.6.5.3 Prohibition of non-recyclable materials for construction	nm
							WR.6.4.5 Use of robotics for efficient sorting	nm
WR.7	WR.7.1.1 Precise recycling rate numbers are missing	m	WR.7.2.1 Recycling rates:		WR.7.3.1 Recycling rates:		WR.7.4.1 Recycling rates:		WR.7.5.1 Recycling rates:		WR.7.1.1 --> There is no precise recycling rate in the country especially for specific waste stream. According to UNEP, overall recycling is less than 50%.
			Metals: ≤ 40 %	nm	Metals: > 40 and ≤ 70 %	nm	Metals: > 70 and ≤ 90 %	nm	Metals: > 90 %	nm
			Paper: ≤ 40 %	nm	Paper: > 40 and ≤ 70 %	nm	Paper: > 70 and ≤ 90 %	nm	Paper: > 90 %	nm
			Glass: ≤ 40 %	nm	Glass: > 40 and ≤ 70 %	nm	Glass: > 70 and ≤ 90 %	nm	Glass: > 90 %	nm
			Composites: ≤ 20 %	nm	Composites: > 20 and ≤ 60 %	nm	Composites: > 60 and ≤ 90 %	nm	Composites: > 90 %	nm
			Plastics: ≤ 20 %	nm	Plastics: > 20 and ≤ 60 %	nm	Plastics: > 60 and ≤ 90 %	nm	Plastics: > 90 %	nm
			WR.7.2.2 Recycling rates:		WR.7.3.2 Recycling rates:		WR.7.4.2 Recycling rates:		WR.7.5.2 Recycling rates:
			E-Waste: > 10 and ≤ 40 %	nm	E-Waste: > 40 and ≤ 70 %	nm	E-Waste: > 70 and ≤ 90 %	nm	E-Waste: > 90 %	nm
			C&D waste: > 10 and ≤ 40 %	nm	C&D waste: > 40 and ≤ 70 %	nm	C&D waste: > 70 and ≤ 90 %	nm	C&D waste: > 90 %	nm
WR.8	WR.8.1.1 CMUR: ≤ 1 % OR no data	m	WR.8.2.1 CMUR: > 1 % ≤ 10 %	na	WR.8.3.1 CMUR: > 10 % ≤ 30 %	na	WR.8.4.1 CMUR: > 30 % ≤ 70 %	na	WR.8.5.1 CMUR: > 70 %	na	N/A
	WR.8.1.2 DR: ≤ 0,1 OR no data	m	WR.8.2.2 DR: > 0,1 ≤ 0,2	na	WR.8.3.2 DR: > 0,2 ≤ 0,4	na	WR.8.4.2 DR: > 0,4 ≤ 0,7	na	WR.8.5.2 DR: > 0,7 ≤ 1,0	na
m	fully met
pm	partially met
nm	not met
na	not available

## Sheet: Prevention and Reuse
	Stage 1		Stage 2		Stage 3		Stage 4		Stage 5		Rationale / Source
Prevention and reuse (PR.1 - PR.6)
PR.1	PR.1.1.1 Prevention is motivated by poverty	m	PR.1.2.1 Prevention is motivated by lack of resources	m					PR.1.5.1 Decoupling of GDP and waste generation	na	PR.1.1.1 + PR.1.2.1 --> m; PR.1.3.1 + PR.1.3.2 + PR.1.3.3 --> pm: According to the Solid Waste strategy plan for Vientiane, food waste is one of the priority targets. Two work plans are indicated that smart bins will be distributed for household levels to store their food waste, and biodegradable bags to large generstors for organic waste collection.[7] Other materials are encouraged to reduce es…
					PR.1.3.1 Higher political priority for food waste issues	pm	PR.1.4.1 Formulation of food waste avoidance targets and implementation of measures	nm	PR.1.5.2 Food waste is reduced to a minimum	nm
					PR.1.3.2 Few disposables are banned or permitted exceptionnally	pm	PR.1.4.2 All disposables are banned or permitted exceptionnally	nm	PR.1.5.3 CE reduces negative impacts of materials and products by avoiding resources or waste	nm
							PR.1.4.3 Prohibited destruction of unsold durable goods	nm	PR.1.5.4 Increase of bans for substances and products	nm
					PR.1.3.3 Emerging initiatives to educate the population regarding closing-loops	pm			PR.1.5.5 CE provides long use of raw materials in the cycle	nm
							PR.1.4.4 Ensured lifetime-extension of buildings before construction	na	PR.1.5.6 Full deconstruction of buildings is ensured before their realization	nm
									PR.1.5.7 Consumption decisions based on waste prevention	nm
PR.2	PR.2.1.1 Lack of circular business and usage models	m	PR.2.2.1 Spare parts of End-of-life (EoL) products are used for repair	pm	PR.2.3.1 Increased use of EoL spare parts	pm			PR.2.5.1 Permanent provision of spare parts through digitalization	nm	PR.2.1.1 -->m; PR.2.2.1 + PR.2.2.2 + PR.2.3.1 + PR.2.3.2 + PR.2.3.3 --> pm: Circular business model and circular economy was introduced and discussed among NGOs. However, there is no clear evidence how these have been adopted for further implementation. On the regional level, there is an ASEAN Circular Economy Framework that was adopted in 2021.[9] Oversized garbage such as furniture and sofas, h…
					PR.2.3.2 Small use of professional repair by small part of the population	pm	PR.2.4.1 High use of professional repair by big part of the population	nm
					PR.2.3.3 Minimum one online spare market exists	pm	PR.2.4.2 Various online spare markets exist	nm	PR.2.5.2 Spare part markets are an integral part of CE	nm
					PR.2.3.4 Product service systems (sharing and leasing) are offered	pm			PR.2.5.3 Sharing and leasing are an integral part of CE	nm
			PR.2.2.2 Voluntary take-back systems for certain wastes (e.g. pharmaceuticals, batteries) exist	pm	PR.2.3.5 Introduction of take-back or deposit systems for certain wastes (e.g. beverage packaging)	nm	PR.2.4.3 Deposit obligation to all single-use beverage packaging and change of deposit contribution	nm	PR.2.5.4 Innovative take-back and collection systems enable reuse and high-quality recycling	nm
							PR.2.4.4 Introduction of deposits on material relevant products (e.g. tablets, smartphones)	nm
PR.3	PR.3.1.1 Companies neglect EoL issues of their products	pm	PR.3.2.1 Pioneer companies are considering EoL issues of their products	na	PR.3.3.1 Through Eco-design several manufacturers are producing in a more environmental friendly way	nm	PR.3.4.1 Increased use of homogenous easy separable, harmfree and secondary materials; less use of disruptive substances	nm	PR.3.5.1 High use of secondary, recyclable or biobased materials for product manufacture	na	PR.3.1.1 + PR.3.1.2 + PR.3.1.3 + PR4.1.1 + PR.4.2.1 --> pm: The link between companies and other institutions are still very limited and often the case very confidential. The CE concept in their products and not observely seen in a wider contexts and product promotion. However, the trend of environmental friendly and responsiblity often shown through their cooperate social responsibility activiti…
	PR.3.1.2 Innovative composite materials are causing disposal problems due to the negligence of EoL in the product design phase	pm					PR.3.4.2 Recyclability, durability and upgradability is generally considered in product design phase	nm	PR.3.5.2 EoL concepts for innovative products prior to market introduction are elaborated to minimize problems at the EoL phase	na
	PR.3.1.3 Companies neglect recyclability, material saving and substitution of hazardous substances during product design phase	pm	PR.3.2.2 Some companies consider recyclability, material savings and substitution of hazardous substances in product design phase	nm					PR.3.5.3 Product recyclability is one basic condition for product marketing	na
							PR.3.4.3 Increasing life cycle assessment of products	na	PR.3.5.4 Almost all companies consider all life cycle phases	na
					PR.3.3.2 Pioneer companies set voluntarly a minimum use rates for secondary resources in their products	na	PR.3.4.4 Legal minimum use rates for recyclates in plastic products: between ≥ 30 % and < 60 %	na	PR.3.5.5 Legal minimum use rates or recyclates in plastic products: ≥ 60 %	na
PR.4	PR.4.1.1 Neglection of issues for proper waste disposal and waste avoidance in companies	pm	PR.4.2.1 Pioneer companies consider issues as improving their waste disposal and prevent waste	pm	PR.4.3.1 Evaluation of production processes	na	PR.4.4.1 Inreased investigation of resource efficiency potentials	na	PR.4.5.1 Waste avoidance and closing loops practice in companies	na
					PR.4.3.2 Substitution of some hazardous materials with non or less hazardous materials	na	PR.4.4.2 Several companies are substituting hazardous with non-hazardous substances	na	PR.4.5.2 Use of pollutants in CE, if controlled circulation considering thresholds is ensured	na
PR.5	PR.5.1.1 WG: ≥ 2 kg/cap + d	na	PR.5.2.1 WG: ≥ 1,5 < 2 kg/cap + d	na	PR.5.3.1 WG: ≥ 1 < 1,5 kg/cap + d	na	PR.5.4.1 WG: ≥ 0,5 < 1 kg/cap + d	m	PR.5.5.1 WG: < 0,5 kg/cap + d	na	PR.5.4.1 --> m: Vientiane generate approx. 0.68 kg/cap/day [3]
PR.6	PR.6.1.1 ZWI: ≤ 0,05	m	PR.6.2.1 ZWI: > 0,05 ≤ 0,15	na	PR.6.3.1 ZWI: > 0,15 ≤ 0,4	na	PR.6.4.1 ZWI: > 0,4 ≤ 0,9	na	PR.6.5.1 ZWI: ≥ 0,9	na	PR.6.1.1 --> m; Laos vategorized in very low Zero Waste indicator < 0.05
m	fully met
pm	partially met
nm	not met
na	not available

## Sheet: References
Ref. No	Description
1	World Bank (2022). Get clean and green - Solid and plastic waste management in Lao PDR
2	JICA (2021). Data collection on Waste Management Sector in Lao PDR.
3	GGGI (2018). Solid Waste Management in Vientiane. Lao PDR
4	Green Vientiane (2023). Batteries collection - dropoff point. Available online: https://www.facebook.com/GreenVientianenetwork
5	MakerBox (2021). E-waste collection initiative. Available online: https://www.facebook.com/profile/100068719531532/search/?q=e-waste
6	Yangchongthuochuaya, k.; Chaiyat, N. (2023). A hybrid waste–solar power generation and waste disposal system in Luang Prabang, Lao People's Democratic Republic (Lao PDR), Case Studies in Chemical and Environmental Engineering, Volume 7, 2023, 100332, ISSN 2666-0164, https://doi.org/10.1016/j.cscee.2023.100332.
7	KOICA & VCOMS & GGGI & EPF (2020). Sustainable Solid Waste Management Strategy and Action plan for Vientiane 2020-2030
8	Plastic Free Laos (2023). About us. Available online: https://plasticfreelaos.com/about/
9	ASEAN (2021). ASEAN adopts framework for Circular Economy.
10	Zaman, A., Swapan, M. Performance evaluation and benchmarking of global waste management systems, Resources, Conservation and Recycling, Volume 114, 2016, Pages 32-41, ISSN 0921-3449, https://doi.org/10.1016/j.resconrec.2016.06.020.
